# Supplementary material for: Association between neighbourhood deprivation, fetal growth, small-for-gestational age and preterm birth: a population-based prospective cohort study
Source: PubMed Central journal article supplement — BMJ Open. 2021 Nov 16;11(11):e049075. doi: 10.1136/bmjopen-2021-049075 (PMC8596053; doi:10.1136/bmjopen-2021-049075), 2021-11-16
Supplement: bmjopen-2021-049075.draft_revisions.pdf [file bmjopen-2021-049075.draft_revisions.pdf]

# BMJ Open

BMJ Open is committed to open peer review. As part of this commitment we make the peer review history of every article we publish publicly available.

When an article is published we post the peer reviewers' comments and the authors' responses online. We also post the versions of the paper that were used during peer review. These are the versions that the peer review comments apply to.

The versions of the paper that follow are the versions that were submitted during the peer review process. They are not the versions of record or the final published versions. They should not be cited or distributed as the published version of this manuscript.

BMJ Open is an open access journal and the full, final, typeset and author-corrected version of record of the manuscript is available on our site with no access controls, subscription charges or pay-per-view fees (<http://bmjopen.bmj.com>).

If you have any questions on BMJ Open's open peer review process please email [info.bmjopen@bmj.com](mailto:info.bmjopen@bmj.com)

# BMJ Open

## Neighbourhood deprivation, fetal growth and adverse pregnancy outcomes: the Generation R Study.

|                               |                                                                                                                                                                                                                                                                                                                                                                                                                                                                                                                                                                                       |
|-------------------------------|---------------------------------------------------------------------------------------------------------------------------------------------------------------------------------------------------------------------------------------------------------------------------------------------------------------------------------------------------------------------------------------------------------------------------------------------------------------------------------------------------------------------------------------------------------------------------------------|
| Journal:                      | <i>BMJ Open</i>                                                                                                                                                                                                                                                                                                                                                                                                                                                                                                                                                                       |
| Manuscript ID                 | bmjopen-2021-049075                                                                                                                                                                                                                                                                                                                                                                                                                                                                                                                                                                   |
| Article Type:                 | Original research                                                                                                                                                                                                                                                                                                                                                                                                                                                                                                                                                                     |
| Date Submitted by the Author: | 14-Jan-2021                                                                                                                                                                                                                                                                                                                                                                                                                                                                                                                                                                           |
| Complete List of Authors:     | Gootjes, Dionne; Erasmus MC, Department of Obstetrics and Gynaecology, Division of Obstetrics and Prenatal Medicine; Erasmus MC, Generation R Study Group<br>Posthumus, Anke G; Erasmus MC, Department of Obstetrics and Gynaecology, Division of Obstetrics and Prenatal Medicine; Erasmus MC, Generation R Study Group<br>Jaddoe, Vincent; Erasmus MC, Department of Paediatrics; Erasmus MC, Generation R Study Group<br>Stegers, E.A.P.; Erasmus MC, Department of Obstetrics and Gynaecology, Division of Obstetrics and Prenatal Medicine; Erasmus MC, Generation R Study Group |
| Keywords:                     | SOCIAL MEDICINE, PUBLIC HEALTH, PREVENTIVE MEDICINE, Ultrasonography < OBSTETRICS, Prenatal diagnosis < OBSTETRICS, Risk management < HEALTH SERVICES ADMINISTRATION & MANAGEMENT                                                                                                                                                                                                                                                                                                                                                                                                     |
|                               |                                                                                                                                                                                                                                                                                                                                                                                                                                                                                                                                                                                       |

SCHOLARONE™  
Manuscripts

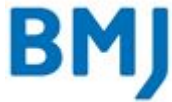

I, the Submitting Author has the right to grant and does grant on behalf of all authors of the Work (as defined in the below author licence), an exclusive licence and/or a non-exclusive licence for contributions from authors who are: i) UK Crown employees; ii) where BMJ has agreed a CC-BY licence shall apply, and/or iii) in accordance with the terms applicable for US Federal Government officers or employees acting as part of their official duties; on a worldwide, perpetual, irrevocable, royalty-free basis to BMJ Publishing Group Ltd ("BMJ") its licensees and where the relevant Journal is co-owned by BMJ to the co-owners of the Journal, to publish the Work in this journal and any other BMJ products and to exploit all rights, as set out in our [licence](#).

The Submitting Author accepts and understands that any supply made under these terms is made by BMJ to the Submitting Author unless you are acting as an employee on behalf of your employer or a postgraduate student of an affiliated institution which is paying any applicable article publishing charge ("APC") for Open Access articles. Where the Submitting Author wishes to make the Work available on an Open Access basis (and intends to pay the relevant APC), the terms of reuse of such Open Access shall be governed by a Creative Commons licence – details of these licences and which [Creative Commons](#) licence will apply to this Work are set out in our licence referred to above.

Other than as permitted in any relevant BMJ Author's Self Archiving Policies, I confirm this Work has not been accepted for publication elsewhere, is not being considered for publication elsewhere and does not duplicate material already published. I confirm all authors consent to publication of this Work and authorise the granting of this licence.

1  
2  
3 1 **Neighbourhood deprivation, fetal growth and adverse pregnancy outcomes:**  
4  
5 2 **the Generation R Study.**

6  
7 3 D.V. Gootjes<sup>1,3</sup>, A.G. Posthumus<sup>1,3</sup>, V.W.V Jaddoe<sup>2,3</sup>, E.A.P. Steegers<sup>1,3</sup>

8  
9 4 <sup>1</sup>Department of Obstetrics and Gynaecology, Division of Obstetrics and Prenatal Medicine,

10  
11 5 <sup>2</sup>Department of Paediatrics, <sup>3</sup>Generation R Study Group, all: Erasmus University Medical Centre,  
12  
13 6 Rotterdam, The Netherlands.

14 7  
15 8  
16 9 **The authors declare no conflict of interest.**

17  
18  
19  
20  
21 10  
22 11 **Corresponding author**

23 12 Correspondence to Dionne V. Gootjes

24 13 Wyttemaweg 80, 3015 CN Rotterdam

25 14 [d.gootjes@erasmusmc.nl](mailto:d.gootjes@erasmusmc.nl)

26 15 Telephone: +3110 703 04 52 | +316 307 252 47

27  
28  
29 16  
30 17  
31 18 **Key words:** fetal, neighborhood/place, deprivation, pregnancy, socio-economic

32  
33  
34  
35 19 **Word count:** 3661

1  
2  
3 20 **Abstract**  
4

5 21 **Objectives:** To study the associations between neighbourhood deprivation and fetal growth, including  
6  
7 22 growth in the first trimester, and adverse pregnancy outcomes.  
8  
9

10 23 **Design:** Prospective cohort study.  
11  
12

13 24 **Setting:** The Netherlands, Rotterdam.  
14  
15

16 25 **Participants:** 8617 live singleton births from the Generation R cohort study.  
17  
18

19 26 **Interventions:** Living in a deprived neighbourhood.  
20  
21

22 27 **Outcome measures:** Fetal growth, including growth in the first trimester, and adverse pregnancy  
23  
24 28 outcomes (small-for-gestational age (SGA) and preterm birth (PTB)).  
25  
26

27 29 **Results:** Neighbourhood deprivation was not associated with first trimester growth. However, a higher  
28  
29 30 neighbourhood status score (less deprivation), was associated with increased fetal growth in the  
30  
31 31 second and third trimester (e.g. estimated fetal weight (adjusted regression coefficient 0.04 (95% CI  
32  
33 32 0.02 ; 0.06). Less deprivation was also associated with a decreased risk of SGA (aOR 0.91 (95% CI  
34  
35 33 0.86 ; 0.97)) and PTB (aOR 0.89 (95% CI 0.82 ; 0.96)).  
36  
37

38 34 **Conclusions:** We found an association between neighbourhood deprivation and fetal growth in the  
39  
40 35 second and third trimester pregnancy, but not with first trimester growth. Neighbourhood deprivation  
41  
42 36 is associated with adverse pregnancy outcomes. The associations remained after adjustment for  
43  
44 37 individual level risk factors. This supports the hypothesis that living in a deprived neighbourhood acts  
45  
46 38 as an independent risk factor for fetal growth and adverse pregnancy outcomes, above and beyond  
47  
48 39 individual risk factors.  
49  
50  
51  
52  
53  
54  
55  
56  
57  
58  
59  
60

1  
2  
3 40 **Article Summary**  
4  
5

6 41 **Strengths and limitations of this study**  
7  
8

- 9 42 • This study investigated the association between neighbourhood deprivation and fetal growth  
10  
11 43 and adverse pregnancy outcomes.  
12  
13  
14 44 • This study is performed within in a large, multi-ethnic cohort.  
15  
16  
17 45 • The Generation R study population is not completely representative of the Dutch population.  
18  
19  
20 46 • Associations were adjusted for a wide range of relevant individual level risk factors, which  
21  
22 47 allows the isolation of a neighbourhood specific effect best as possible.  
23  
24  
25  
26  
27  
28  
29  
30  
31  
32  
33  
34  
35  
36  
37  
38  
39  
40  
41  
42  
43  
44  
45  
46  
47  
48  
49  
50  
51  
52  
53  
54  
55  
56  
57  
58  
59  
60

## 48 Introduction

49 A low individual socioeconomic status (SES) is associated with adverse health outcomes.(1)  
50 Additionally, there is accumulating evidence that the socioeconomic status of the neighbourhood in  
51 which a person lives is also associated with health outcomes.(2) This is also the case for pregnancy:  
52 both individual SES and living in a deprived neighbourhood are acknowledged risk factors for adverse  
53 pregnancy outcomes.(3-5)

54 Recent evidence shows that other factors, such as maternal nutrition and lifestyle, already  
55 affect pregnancy from the first trimester of pregnancy onwards.(6) Gaining a better understanding of  
56 modifiable factors that influence pregnancy from the earliest phase onwards is important. First, since  
57 impaired development during the first trimester of pregnancy is associated with adverse pregnancy  
58 outcomes.(6) Second, in line with the DOHaD-paradigm (Developmental Origin of Health and  
59 Disease), impaired development in pregnancy and adverse pregnancy outcomes are associated with an  
60 increased risk of non-communicable diseases in adult life like cardiovascular disease.(7) If impaired  
61 early fetal development could be prevented or recognized, this would enable the prevention of both  
62 short-term and long-term adverse outcomes.

63 Living in a deprived neighbourhood is known to be a risk factor for adverse pregnancy  
64 outcomes. It is however unknown whether this potentially modifiable factor is also associated with  
65 early fetal development. Therefore, the aim of this study was to investigate the associations between  
66 neighbourhood deprivation, fetal growth including growth in the first trimester, and adverse pregnancy  
67 outcomes.

68

## 69 Methods

### 70 Design

71 This study was embedded in the Generation R Study, a population-based prospective cohort  
72 study.(8) Pregnant women living in the area of Rotterdam, the Netherlands, with an expected delivery  
73 date between April 2002 and January 2006, were invited to participate in this study. We excluded the

1  
2  
3 74 following pregnancies: twin pregnancies, terminated pregnancies, intra-uterine deaths and pregnancies  
4  
5 75 without information on area of residence or ultrasound data (**Figure 1**). The study protocol was  
6  
7 76 approved by the Medical Ethical Committee of Erasmus Medical Centre, Rotterdam (MEC 198.782/  
8  
9 77 2001/31). Written informed consent was obtained from all participants.  
10  
11

### 12 78 **Patient and public involvement statement**

13 79 This research was done without patient involvement. Patients were not invited to comment on  
14  
15 80 the study design and were not consulted to develop patient relevant outcomes or interpret the results.  
16  
17 81 Patients were not invited to contribute to the writing or editing of this document for readability or  
18  
19 82 accuracy.  
20  
21  
22

### 23 83 **Neighbourhood deprivation**

24 84 We used area-based status scores as a proxy for neighbourhood deprivation, which were made  
25  
26 85 available by the Netherlands Institute for Social Research.(9) The scores are matched on four-digit  
27  
28 86 postcodes and are based on mean household income, proportion of population with low income,  
29  
30 87 proportion of population with low educational level, and proportion of population without paid work.  
31  
32 88 The scores are determined every 4 years, and a more negative score represents a lower socioeconomic  
33  
34 89 status. The status scores used in this study were calculated in 2002 and 2006. The correlations between  
35  
36 90 the status scores in 2002 and 2006 were very high:  $r = 0.97$ . To assign the status scores in the best  
37  
38 91 possible way, pregnancies in 2002 and 2003 were allocated with the status score of 2002. For  
39  
40 92 pregnancies in 2005 and 2006, the status score of 2006 was assigned. For pregnancies in 2004, the  
41  
42 93 average score of 2002 and 2006 was assigned.  
43  
44  
45

### 46 94 **Pregnancy dating**

47 95 Gestational age is the most important determinant of fetal growth, so precise dating of the  
48  
49 96 pregnancy is important. It has long been assumed that embryonic growth in the first trimester of  
50  
51 97 pregnancy is universal. This is the rationale behind the current practice of pregnancy dating using the  
52  
53 98 CRL, if the gestational age is less than 12 weeks and 5 days and the CRL measurement is smaller than  
54  
55 99 65 mm.(10) However, study findings suggest that first trimester growth is not uniform.(11) Therefore,  
56  
57  
58 100 in our analyses with CRL measurements as the outcome of interest, pregnancy dating was not based  
59  
60 101 on the CRL, but on the known and reliable last menstrual period (LMP) in case of a regular menstrual



1  
2  
3 102 cycle ( $28 \pm 4$  days).(6) All other cases were excluded for that particular analyses of CRL. The LMP  
4  
5 103 was obtained from the referral letter and confirmed at enrolment. Additional information on regularity  
6  
7 104 and cycle duration was obtained through questionnaires. When the gestational age was more than 12  
8  
9 105 weeks and 5 days, or the biparietal diameter (BPD) was larger than 23 mm, pregnancy dating was  
10  
11 106 performed using the BPD.

### 107 **Growth parameters**

108       Ultrasound assessments were carried out during visits to one of the research centres, and took  
109 place in early- (median 13.2 weeks of gestation), mid- (median 20.5 weeks of gestation) and late  
110 (median 30.3 weeks of gestation) pregnancy. Growth parameters included the crown-rump length  
111 (CRL), head circumference (HC), femur length (FL), abdominal circumference (AC), estimated fetal  
112 weight (EFW) and birthweight. EFW was calculated using the Hadlock formula with parameters AC,  
113 HC and FL (in cm):  $EFW = 10^{(1.326 - 0.00326*AC*FL + 0.0107*HC + 0.0438*AC + 0.158*FL)}$   
114 (**Supplemental 2. First trimester and fetal growth, measurement guidelines**).(12) Gestational age  
115 adjusted standard deviation scores (SDS) were constructed for all growth measurements.(13) The SDS  
116 for birthweight were constructed using growth standards from Niklasson et al., which were adjusted  
117 for gestational age at the time of birth and sex of the neonate.(14) Measurements were performed  
118 using uniform ultrasound procedures and were executed with the Aloka® model SSD-1700 (Tokyo,  
119 Japan) or the ATL-Philips Model HDI 5000 (Seattle, WA, USA).

### 120 **Adverse pregnancy outcomes**

121       Preterm birth (PTB) was defined as a gestational age of <37 weeks at delivery. Small size for  
122 gestational age (SGA) at birth was defined as a sex and gestational age adjusted birth weight below the  
123 10<sup>th</sup> percentile (<-1.40 SDS) in the study cohort.

### 124 **Covariates**

125       Information on maternal age, education level, ethnicity, and maternal folic acid supplement  
126 use was obtained at enrolment.(8) Ethnicity of participating mothers was defined according to the  
127 classification of Statistics Netherlands, and was categorized into Dutch and other Western (European,  
128 American, and Oceanian); Turkish and Moroccan; African (Cape Verdean, other African, Surinamese-

1  
2  
3 129 Creole, and Dutch Antillean); and Asian (Indonesian, other Asian, and Surinamese-Hindu) according  
4  
5 130 to the largest ethnic groups in our study population and similarities in skin colour and cultural  
6  
7 131 background. In sensitivity analyses, the following classification was used: Dutch, European, Turkish,  
8  
9 132 Moroccan, African, Dutch Antillean, Cape Verdean, Indonesian, Surinamese-Creole, Surinamese-  
10  
11 133 Hindu, Surinamese-unspecified, American Western, American non Western, Asia Western, Asia non  
12  
13 134 Western and Oceanian.(8) Information about smoking, alcohol consumption, and caffeine intake was  
14  
15 135 assessed by questionnaires in each trimester. Maternal pre-pregnancy body mass index was calculated  
16  
17 136 from the reported height (cm) and weight (kg) in the questionnaires. Information about pregnancy  
18  
19 137 complications, mode of delivery and childhood sex, gestational age, and weight and length at birth was  
20  
21 138 obtained from medical records.(13, 14) Complications in a previous pregnancy were defined as:  
22  
23 139 gestational diabetes, pre-eclampsia, thrombosis in arm or leg, pulmonary embolism, solutio placentae,  
24  
25 140 premature rupture of membranes, contractions before 37 weeks of pregnancy or pregnancy induced  
26  
27 141 hypertension. We selected potential confounding variables based on their associations with the  
28  
29 142 outcomes of interest, in order to isolate a neighbourhood specific effect.  
30  
31  
32  
33  
34  
35

### 144 **Statistical analysis**

145 First, we examined differences between quartiles of neighbourhood deprivation for maternal  
146 characteristics, first trimester growth and fetal growth and adverse pregnancy outcomes. Second, we  
147 examined the associations of neighbourhood deprivation with fetal growth patterns using unbalanced  
148 repeated measurement regression models.(15) We included neighbourhood deprivation in these  
149 models as intercept and as interaction term with gestational age to estimate fetal growth rates over  
150 time.(15) Third, we assessed the associations of neighbourhood deprivation with the risks of adverse  
151 pregnancy outcomes using multiple logistic regression models. In the basic model, the crude  
152 association between neighbourhood deprivation and the outcomes of interest were investigated. The  
153 adjusted model was adjusted for maternal age, maternal educational level, smoking, alcohol use, folic  
154 acid supplement use, ethnicity, parity, pre-pregnancy BMI and fetal sex. We tested interaction between  
155 neighbourhood deprivation and complications in previous pregnancy in the regression models. Fourth,  
60

1  
2  
3 156 we examined the associations of neighbourhood deprivation with fetal growth in gestational-age-  
4  
5 157 adjusted SDS in each pregnancy period using linear regression models with the same adjustment  
6  
7 158 models.

9 159 We performed several sensitivity analyses: in the first, we performed multilevel regression  
10  
11 160 analysis in order to adjust for potential clustering between the different neighbourhoods. In the second,  
12  
13 161 we repeated the analyses with all 1614 available CRL measurements, compared to the analyses with  
14  
15 162 only CRL measurements below the 12 weeks of gestational age (GA).<sup>(6, 16)</sup> A third sensitivity  
16  
17 163 analysis was performed to determine to which extent the inclusion of pregnancies with an impaired  
18  
19 164 fetal development due to placental dysfunction influenced our results. Therefore we performed  
20  
21 165 analyses excluding SGA born babies. Fourth, analyses were additionally adjusted for the household  
22  
23 166 income and complications in a previous pregnancy. Fifth, we repeated the analyses with the different  
24  
25 167 classification of ethnicity, described in the ‘Covariates’ section. Lastly, we explored the associations in  
26  
27 168 the dataset only including the first born (i.e. excluding siblings). We used multiple imputation for  
28  
29 169 missing values of covariates according to Markov Chain Monte Carlo method (details given in  
30  
31 170 **Supplemental 1**).<sup>(17)</sup> The percentage of missing data was <10%, except for smoking (12.7%),  
32  
33 171 alcohol use (13.8%) and folic acid supplement use (25.9%). Five imputed datasets were created and  
34  
35 172 pooled for analyses. A sensitivity analysis was performed to observe differences in observed and  
36  
37 173 expected values of confounders before and after imputation. Tests for trend were based on regression  
38  
39 174 models with neighbourhood deprivation as a continuous variable. We checked whether the regression  
40  
41 175 models were linear using scatterplots of the dependent variable plotted against the independent  
42  
43 176 variable.<sup>(18)</sup> Residuals were normally distributed as assessed by visual inspection of a normal  
44  
45 177 probability plot. We tested for multicollinearity using the tolerance statistic. As tolerance was >0.20  
46  
47 178 for all variables in our models, there were no problems of multicollinearity. The repeated measurement  
48  
49 179 analysis was performed using the Statistical Analysis System version 9.3 (SAS, Institute Inc., Cary,  
50  
51 180 NC, USA), including the Proc Mixed module for unbalanced repeated measurements. All other  
52  
53 181 analyses were performed using the Statistical Package of Social Sciences version 21.0 for Windows  
54  
55 182 (IBM Corp., Armonk, NY, USA).

## 183 Results

184 A total of 8976 pregnancies were included in the Generation R study. In total, we included  
185 8617 pregnancies for analyses (**Figure 1**). **Table 1** depicts the baseline characteristics of both the total  
186 study population and the population stratified according to the quartiles of neighbourhood deprivation.  
187 Women in the total study population were on average 29.6 years old with a median BMI of 22.8  
188 kg/m<sup>2</sup>. Stratification of the population in deprivation quartiles revealed that 2170 women (25.2%)  
189 lived in a neighbourhood with the most deprivation, i.e. lowest status score, and 2149 (24.9%) lived in  
190 the least deprived neighbourhoods, i.e. the highest status score. When comparing women in the most  
191 deprived neighbourhoods to those in the least deprived neighbourhoods, less women were highly  
192 educated (23.7% vs. 62.8% (p<0.001)), more women continued smoking in pregnancy (22.3% vs.  
193 11.9% (p<0.001)) and less women used any folic acid supplements (20.0% vs. 49.7% respectively  
194 (p<0.001)) (**Table 1**). In **Supplemental Table 1** the fetal growth parameters and adverse pregnancy  
195 outcomes stratified by quartile of neighbourhood deprivation are presented. Overall, growth  
196 parameters are smaller in the most deprived neighbourhoods compared to the least deprived  
197 neighbourhoods (e.g. -0.07 SD vs. 0.15 SD, EFW in the third trimester of pregnancy, respectively).

### 198 Neighbourhood deprivation and fetal growth

199 **Figure 2** gives the results of the longitudinal analyses on the association between quartiles of  
200 neighbourhood deprivation and fetal head circumference, length, and weight growth patterns from  
201 mid-pregnancy onwards. It shows that compared to the least deprived neighbourhoods, in the more  
202 deprived neighbourhoods fetal head circumferences, length and weight are smaller (for all measures,  
203 the gestational age dependent effect of neighbourhood deprivation on fetal growth was significant  
204 value<0.05). Regression coefficients for gestational age-independent and gestational age-dependent  
205 effects are given in **Supplemental Table 2**.

206 The associations of neighbourhood deprivation with first trimester and second and third  
207 trimester fetal growth based on regular linear regression models are given in **Supplemental Figure 1**.  
208 In both the basic and adjusted analyses, a positive association between neighbourhood deprivation and  
209 AC was present (difference in AC in the adjusted model, 0.03 SDS [95% CI 0.01, 0.05, P-value 0.002]  
210 per 1 unit increase in neighbourhood status score). In the third trimester of pregnancy a positive

1  
2  
3 211 association was found for the HC, AC and EFW (adjusted model difference of 0.04 SDS [95% CI  
4  
5 212 0.02, 0.05, P-value <0.001], 0.04 SDS [95% CI 0.03, 0.06, P-value <0.001] and 0.04 SDS [95% CI  
6  
7 213 0.03, 0.06, P-value <0.001] per 1 unit increase in neighbourhood status score, respectively). Overall,  
8  
9 214 there is a dose-response like association between neighbourhood deprivation and fetal growth, with  
10  
11 215 stronger associations in the most deprived neighbourhoods compared to the least deprived  
12  
13  
14 216 neighbourhoods.

15  
16 217 Effect modification analyses showed significant interaction between neighbourhood  
17  
18 218 deprivation and complications in previous pregnancies for PTB (**Supplemental Table 3**). The  
19  
20 219 associations between neighbourhood deprivation and fetal growth and adverse pregnancy outcomes  
21  
22 220 were non-significant in the group with a complication in a previous pregnancy (e.g. HC in late  
23  
24 221 pregnancy attenuates from 0.06 SDS [95%CI 0.05 , 0.08, P-value <0.001] to 0.03 SDS [95%CI -0.05 ,  
25  
26 222 0.11, P-value 0.50] per 1 unit increase in neighbourhood status score) (**Supplemental Table 4**).

### 27 28 223 **Neighbourhood deprivation and adverse pregnancy outcomes**

29  
30 224 Results of the regression analysis between neighbourhood deprivation and adverse pregnancy  
31  
32 225 outcomes are presented in **Table 2**. Living in a more affluent neighbourhood was inversely associated  
33  
34 226 with the risk of delivering a SGA neonate (adjusted model, OR 0.91 [95% CI 0.86, 0.97, P-value  
35  
36 227 0.01], independent of maternal sociodemographic or lifestyle factors. Moreover, it was inversely and  
37  
38 228 independently associated with the risk of PTB (adjusted model, OR 0.89 [95% CI 0.82, 0.96, P-value  
39  
40 229 0.01]. The adverse pregnancy outcomes were most prevalent in the neighbourhood with the lowest  
41  
42 230 deprivation status compared to the neighbourhood with the highest social status (SGA: 12.2% vs.  
43  
44 231 7.1%, PTB: 5.9% vs. 3.8%) (**Supplemental Table 1**).

### 45 46 47 232 **Sensitivity analyses**

48  
49 233 The first sensitivity analyses revealed largely similar associations after performing multilevel  
50  
51 234 analyses (**Supplemental Table 5**). Second, the results of the associations between neighbourhood  
52  
53 235 deprivation and CRL did not change after including all CRL measurements, in comparison to only the  
54  
55 236 CRL measurements below 12 weeks GA (**Supplemental Table 5**). The third sensitivity analyses  
56  
57 237 excluding SGA pregnancies did attenuate the results (**Supplemental Table 6**). Results also did not  
58  
59 238 materially change after all other sensitivity analyses (data not shown). No major differences were

1  
2  
3 239 observed in confounders before and after multiple imputation (**Supplemental Table 7**) and there were  
4  
5 240 similar results when confounders were not imputed (data not shown).  
6  
7  
8

## 9 241 **Discussion**

### 11 242 **Main findings**

13 243 We observed that living in a more deprived neighbourhood is associated with decreased fetal  
14  
15 244 growth in the second and third trimester of pregnancy, and with higher odds of small for gestational  
16  
17 245 age birth and preterm birth. Several pathways may explain the disadvantageous effects of living in a  
18  
19 246 deprived neighbourhood on pregnancy.(19) First, it is proposed to be due to the accumulation of risk  
20  
21 247 factors at the individual level.(5) Examples are smoking and inadequate nutrition and lifestyle  
22  
23 248 behaviours.(20) Neighbourhood deprivation then acts as a proxy for the increased prevalence of risk  
24  
25 249 factors within the deprived neighbourhoods. Our findings are substantiated by earlier studies within  
26  
27 250 the Generation R birth cohort, that demonstrate that living in a deprived neighbourhood is  
28  
29 251 accompanied by the accumulation of individual level risk factors. These in turn were associated with  
30  
31 252 adverse pregnancy outcomes.(5) However, we observe that even after correction for the individual  
32  
33 253 level risk factors, the association between neighbourhood deprivation and impaired development and  
34  
35 254 adverse pregnancy outcomes remained, emphasizing an isolated role for neighbourhood deprivation as  
36  
37 255 a risk factor for pregnancy. The associations between neighbourhood deprivation and fetal growth and  
38  
39 256 adverse pregnancy outcomes attenuated to non-significance in the population affected by a  
40  
41 257 complication in a previous pregnancy. These complications, and the maternal constitution for the  
42  
43 258 development of it, may thus outweigh the contribution of neighbourhood deprivation in the  
44  
45 259 associations with fetal growth and adverse pregnancy outcomes. This may be due to the fact that past  
46  
47 260 complications in pregnancy are strongly associated with both neighbourhood deprivation and fetal  
48  
49 261 growth and adverse pregnancy outcomes.(21). A second pathway which may explain the  
50  
51 262 disadvantageous effects of living in a deprived neighbourhood on adverse pregnancy outcomes is  
52  
53 263 attributed to the lack of or suboptimal access to facilities such as the possibility to purchase healthy  
54  
55 264 food nearby.(22) Third, living in a deprived neighbourhood is acknowledged as a source of chronic  
56  
57 265 stress, and thereby acts as an independent risk factor for adverse health outcomes.(19, 23) Stress is  
58  
59  
60

1  
2  
3 266 associated with increased cortisol levels, and both prolonged or repeated cortisol exposure increases  
4  
5 267 the risk for impaired physical health.(24) Also with regard to pregnancy, stress is demonstrated to be  
6  
7 268 harmful. M since maternal stress during pregnancy is associated with preterm birth, lower birthweight  
8  
9 269 and the onset of preeclampsia and gestational diabetes.(25, 26)

10  
11 270 Our data demonstrates that the associations between neighbourhood deprivation and fetal  
12  
13 271 growth become stronger over the course of pregnancy. This may be due to the fact that there are  
14  
15 272 different mechanisms by which external factors -such as environmental, nutritional and lifestyle  
16  
17 273 factors- affect the developing fetus over the different trimesters of pregnancy. In the first trimester of  
18  
19 274 pregnancy the embryo depends on the uterine glands and yolk sac for the provision of nutrients, while  
20  
21 275 in the subsequent periods of pregnancy there is an exchange of nutrients between the maternal and  
22  
23 276 fetal circulations across the placenta.(27) The more isolated source of nutrition in the first trimester  
24  
25 277 compared to the second and third trimester of pregnancy may decrease the sensitivity of first trimester  
26  
27 278 embryonic growth to external influences.

28  
29  
30 279 A previous study of our group, observed a negative association between neighbourhood  
31  
32 280 deprivation and first trimester growth. The larger embryos in deprived neighbourhoods were  
33  
34 281 hypothesized to be explained by strong unmeasured intrinsic and extrinsic factors, such as mental  
35  
36 282 stressors.(28) The difference in direction of effects between that study and our current findings, may  
37  
38 283 be due to the different source populations; the first study was conducted in a tertiary-hospital based  
39  
40 284 cohort, while the present study is performed within a population-based cohort.

#### 41 42 43 44 285 **Strengths and limitations**

45 286 Strengths of this study include the large number of participants and the availability of  
46  
47 287 extensive data which allowed us to adjust for a large number of potential confounders. Its population-  
48  
49 288 based design in a multi-ethnic population results in a good representation of the residents of the city of  
50  
51 289 Rotterdam. The presence of both residents from deprived and more affluent neighbourhoods in the  
52  
53 290 study population allowed us to investigate the effect of this exposure extensively. The choice of the  
54  
55 291 neighbourhood deprivation indicator is another strength of this study. To classify the degree of  
56  
57 292 neighbourhood deprivation often composite indexes are used, which take factors into account such as  
58  
59 293 the percentage of educated or employed residents, and income of residents within a specific

1  
2  
3 294 neighbourhood.(29) We selected the status scores of the Netherlands Institute for Social Research,  
4  
5 295 because this index is comparable with international indices such as the Index of Multiple Deprivation  
6  
7 296 and the Jarman score.(30, 31) The status scores are a continuous measure, which allows more accurate  
8  
9 297 analyses compared to a dichotomous measure. Another strength of the study was that missing data of  
10  
11 298 covariates was handled by applying multiple imputations. In comparison with complete-case analyses  
12  
13 299 (which was conducted as a sensitivity analysis), this technique maintains the statistical power of the  
14  
15 300 analyses. Lastly, we chose not to adjust for nutritional factors other than alcohol intake and folic acid  
16  
17 301 supplement use, since alcohol intake and folic acid supplement use are strongly correlated with other  
18  
19 302 lifestyle and nutritional habits.(32, 33)

20  
21  
22 303 Some limitations of this study also merit discussion. First, we adjusted the analyses for  
23  
24 304 individual factors, to isolate a neighbourhood specific effect. However, we cannot rule out the  
25  
26 305 presence of residual confounding caused by other individual factors that are strongly associated with  
27  
28 306 fetal growth. Next, possible misclassification of neighbourhood deprivation may have occurred if  
29  
30 307 women moved during pregnancy to a neighbourhood with a different status score from the one they  
31  
32 308 moved out of. However, social mobility in pregnancy is limited and if women move, they generally  
33  
34 309 tend to move to a neighbourhood with a comparable deprivation status.(34) Third, the power of the  
35  
36 310 analyses on CRL are lower due to the availability of only one CRL measurement, instead of a repeated  
37  
38 311 assessment of the CRL. A last disadvantage is that participants of cohort studies, even those in more  
39  
40 312 deprived neighbourhoods, generally have a higher level of health awareness and are generally more  
41  
42 313 healthy compared to those who do not participate.(8) This may reduce the generalizability of our  
43  
44 314 findings to the general population.

### 315 **Future perspectives**

316 In future studies, a potential power issue due to the small measurement differences in first  
317 trimester growth measurements may be prevented by using larger study sample sizes. Moreover more  
318 accurate measures of early fetal growth with higher quality ultrasound could increase the variability of  
319 the measurements which enables detection of very small differences. Additionally, animal studies may  
320 help unravel the underlying mechanisms through which neighbourhood deprivation affect pregnancy.  
321 For instance, by further investigating how maternal stress affects placental nutrient transport.



1  
2  
3 322 In the Netherlands, in both the prenatal and postnatal setting, screening for non-medical risk  
4  
5 323 factors is starting to become part of daily medical practice.(35, 36) This allows early interventions in  
6  
7 324 order to prevent developmental problems of children in later life. However, we propose a shift of  
8  
9 325 attention towards an earlier window of opportunity: the preconception period and first trimester of  
10  
11 326 pregnancy. This periconception period provides the opportunity to optimize the conditions of  
12  
13 327 pregnancy and thereby decrease the risks of adverse outcomes and all their long-term  
14  
15 328 consequences.(37) For example, based on an early risk assessment, a pregnant woman living in a  
16  
17 329 deprived neighbourhood could be scheduled for extra ultrasounds and check-ups, and be assisted to  
18  
19 330 improve modifiable lifestyle risk factors.

21  
22 331 Additionally, it is important to create more awareness among politicians, policymakers and  
23  
24 332 public health workers. They could help to embed neighbourhood deprivation in the context of health  
25  
26 333 promotion, by developing and promoting targeted preventive intervention programs.(38) These  
27  
28 334 programs could specifically focus on residents of deprived neighbourhoods. It is important to stimulate  
29  
30 335 these residents to diminish risk factors on the individual level, for instance to quit smoking and abstain  
31  
32 336 from alcohol. This could also help to narrow health inequalities between neighbourhoods and between  
33  
34 337 groups of different socioeconomic status.

35  
36  
37 338 In conclusion, our obtained insights on the association between neighbourhood deprivation  
38  
39 339 and fetal growth and prematurity emphasize the need for a comprehensive research, care and policy  
40  
41 340 approach from the preconception phase onwards, to mitigate the risk of adverse pregnancy outcomes  
42  
43 341 due to deprivation.

44  
45 342  
46  
47  
48  
49  
50  
51  
52  
53  
54  
55  
56  
57  
58  
59  
60

1  
2  
3 343 **Twitter** Dionne Gootjes @dvgootjes  
4  
5 344

6 345 **Acknowledgements** The Generation R Study is conducted by the Erasmus Medical Centre in close  
7  
8 346 collaboration with the School of Law and the Faculty of Social Sciences at the Erasmus University,  
9  
10 347 Rotterdam, the Municipal Health Service, Rotterdam area and the Stichting Trombosedienst and  
11 348 Artsenlaboratorium Rijnmond (Star-MDC), Rotterdam. We gratefully acknowledge the contribution of  
12 349 children and their parents, general practitioners, hospitals, midwives and pharmacies in Rotterdam.  
13  
14 350

15 351 **Author Contributions** All authors made a substantive contribution to the manuscript. DG analyzed  
16 352 the data and wrote the article. AP, VJ, and ES contributed to the design of the paper, interpretation of  
17 353 the data, revisions and gave input at all stages of the study. All authors have approved the final version  
18 354 of the manuscript.  
19  
20  
21  
22

23 355 **Funding:** The Generation R Study was made possible by financial support from Erasmus MC,  
24 356 University Medical Centre Rotterdam, the Netherlands; the Netherlands Organization for Health  
25 357 Research and Development; the Netherlands Organization for Scientific Research; the Ministry of  
26 358 Health, Welfare and Sport; and the Ministry of Youth and Families. Prof. Dr. Vincent Jaddoe received  
27 359 additional grants from the Netherlands Organization for Health Research and Development (grants  
28 360 90700303 and 916.10159, and VIDI 016.136.361) and a Consolidator Grant from the European  
29 361 Research Council (ERC-2014-CoG-64916).  
30  
31  
32  
33

34 362 **Competing interests:** None declared.  
35

36 363 **Patient and public involvement:** Patients and/or the public were involved in the design, or conduct,  
37 364 or reporting, or dissemination plans of this research. Refer to the Methods section for further details.  
38  
39

40 365 **Patient consent for publication:** Not required.  
41  
42

43 366 **Ethics approval** The study has been approved by the Medical Ethical Committee of the Erasmus  
44 367 Medical Centre in Rotterdam on December 17th 2001 (MEC 198.782/2001/31). Written consent was  
45 368 obtained from all participants.  
46  
47

48 369 **Data availability statement** Data requests can be made to the secretariat of Generation R.  
49  
50

51 370 **ORCID iDs**

52  
53 371 Dionne Gootjes <https://orcid.org/0000-0002-9382-9031>

54  
55 372 Anke Posthumus <https://orcid.org/0000-0002-4882-3474>

56  
57 373 Vincent Jaddoe <https://orcid.org/0000-0003-2939-0041>  
58  
59  
60

1  
2  
3  
4  
5  
6  
7  
8  
9  
10  
11  
12  
13  
14  
15  
16  
17  
18  
19  
20  
21  
22  
23  
24  
25  
26  
27  
28  
29  
30  
31  
32  
33  
34  
35  
36  
37  
38  
39  
40  
41  
42  
43  
44  
45  
46  
47  
48  
49  
50  
51  
52  
53  
54  
55  
56  
57  
58  
59  
60

374 Eric Steegers <https://orcid.org/0000-0001-6658-9274>

For peer review only

## 375 **Tables and figures**

376 **Figure 1. Flowchart of the study population.**

377 **Figure 2. Associations of neighbourhood deprivation with fetal growth.**

378 **Table 1. Baseline characteristics of the study population, stratified for quartiles of the**  
379 **neighbourhood status score.**

380 **Table 2. Associations between the neighbourhood status score and adverse pregnancy outcomes.**

## 381 **Supplemental material**

382 **Supplemental Table 1. Fetal growth and adverse pregnancy outcomes in the study population,**  
383 **stratified for quartiles of the neighbourhood status score.**

384 **Supplemental Table 2. Regression coefficients of longitudinal associations between quartiles of**  
385 **neighbourhood deprivation with fetal growth patterns.**

386 **Supplemental Table 3. P-value of interaction terms (neighbourhood deprivation \* parity and**  
387 **neighbourhood status score \* complications in a previous pregnancy).**

388 **Supplemental Table 4. Associations between the neighbourhood SES and fetal growth and**  
389 **adverse pregnancy outcomes, split for nulliparous women, multiparous women without a**  
390 **complications in a previous pregnancy or multiparous women with a complications in a previous**  
391 **pregnancy.**

392 **Supplemental Table 5. Sensitivity analysis with all available CRL measurements in the study**  
393 **population.**

394 **Supplemental Table 6. Associations between the neighbourhood SES and fetal growth in a**  
395 **selected cohort of non-SGA pregnancies.**

396 **Supplemental Table 7. Observed and expected values of covariates.**

- 1  
2  
3 397 **Supplemental Figure 1. Associations between the neighbourhood deprivation and fetal growth**  
4  
5 398 **parameters.**  
6  
7  
8 399 **Supplemental Figure 2. Multilevel regression analysis of associations between neighbourhood**  
9  
10 400 **deprivation and first trimester and fetal growth measurements.**  
11  
12 401 **Supplemental 1. Multiple imputations for missing data of covariates**  
13  
14  
15 402 **Supplemental 2. First trimester and fetal growth, measurement guidelines.**  
16  
17  
18  
19  
20  
21  
22  
23  
24  
25  
26  
27  
28  
29  
30  
31  
32  
33  
34  
35  
36  
37  
38  
39  
40  
41  
42  
43  
44  
45  
46  
47  
48  
49  
50  
51  
52  
53  
54  
55  
56  
57  
58  
59  
60

For peer review only

403 **Figure 1.** Flowchart of the study population.

404

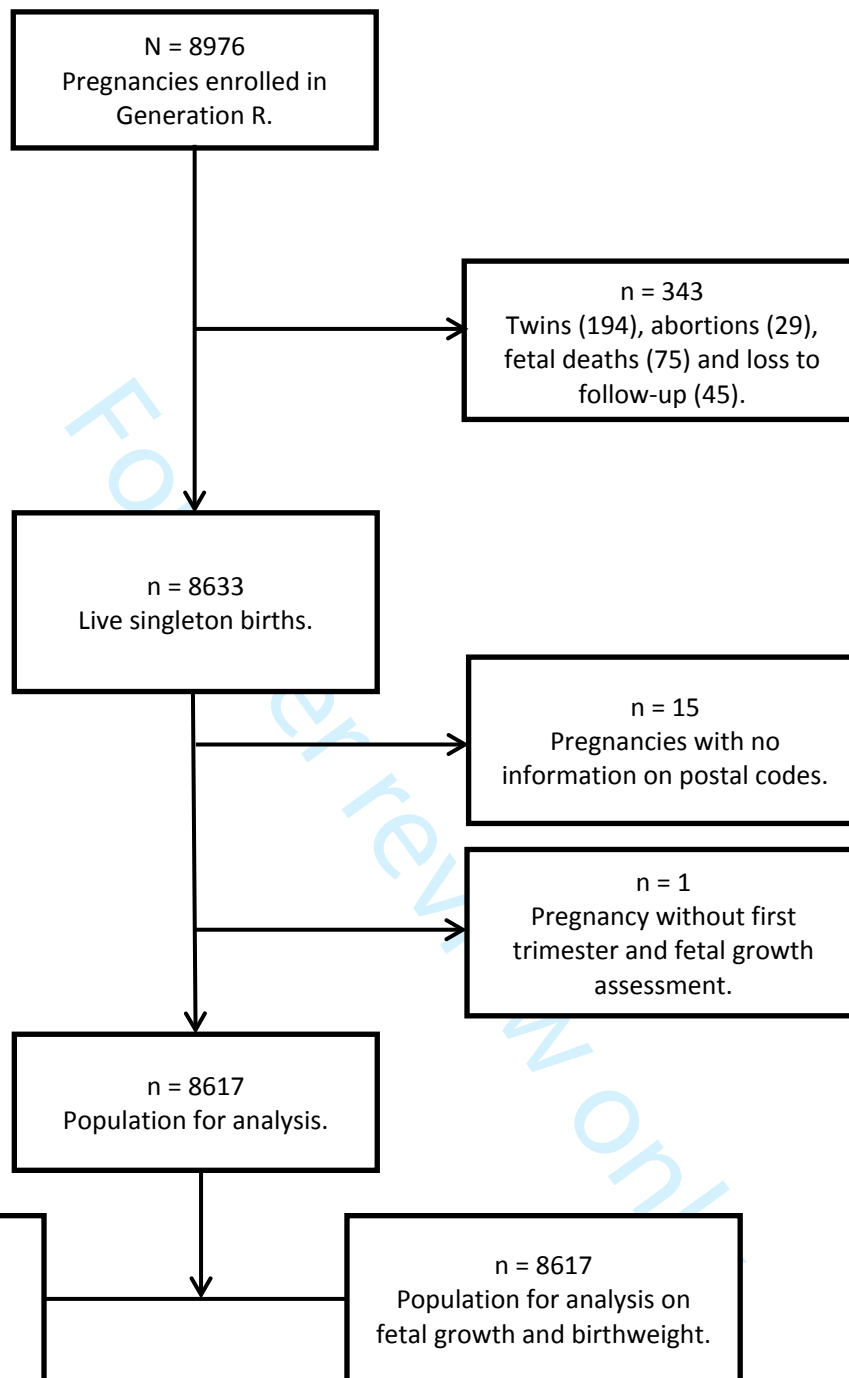

405 **Table 1.** Baseline characteristics of the study population, stratified for quartiles of neighbourhood deprivation.

| Maternal characteristics                           | Total study population<br>n = 8617 | Lowest deprivation quartile<br>n = 2170 | Second deprivation quartile<br>n = 2208 | Third deprivation quartile<br>n = 2090 | Highest deprivation quartile<br>n = 2149 | p-value |
|----------------------------------------------------|------------------------------------|-----------------------------------------|-----------------------------------------|----------------------------------------|------------------------------------------|---------|
| Neighbourhood status score                         | -1.13 (1.39)                       | -2.96 (0.51)                            | -1.62 (0.31)                            | -0.51 (0.37)                           | 0.61 (0.49)                              | <0.001  |
| Age at intake (years)                              | 29.6 (5.3)                         | 28.1 (5.5)                              | 28.7 (5.7)                              | 30.2 (4.9)                             | 31.6 (4.1)                               | <0.001  |
| Pre-pregnancy body mass index (kg/m <sup>2</sup> ) | 22.8 (18.4 – 32.2)                 | 23.5 (18.0 – 33.6)                      | 23.0 (18.1 – 32.5)                      | 22.9 (18.2 – 32.0)                     | 22.3 (18.5– 30.1)                        | <0.001  |
| Parity (nulliparous)                               | 4796 (55.7)                        | 1090 (50.2)                             | 1273 (57.7)                             | 1227 (58.7)                            | 1205 (56.1)                              | <0.001  |
| Educational level                                  |                                    |                                         |                                         |                                        |                                          | <0.001  |
| Lower/no                                           | 1101 (12.8%)                       | 503 (23.2)                              | 366 (16.5)                              | 179 (8.5)                              | 52 (2.4)                                 |         |
| Middle                                             | 4060 (47.1)                        | 1153 (53.1)                             | 1152 (52.2)                             | 1007 (48.2)                            | 747 (34.8)                               |         |
| High                                               | 3456 (40.1)                        | 514 (23.7)                              | 690 (31.3)                              | 904 (43.3)                             | 1349 (62.8)                              |         |
| Ethnicity                                          |                                    |                                         |                                         |                                        |                                          | <0.001  |
| Dutch and Western                                  | 4967 (57.6%)                       | 636 (29.3)                              | 1084 (49.1)                             | 1426 (68.2)                            | 1821 (84.7)                              |         |
| Turkish and Moroccan                               | 1464 (17.0%)                       | 714 (32.9)                              | 471 (21.3)                              | 222 (10.6)                             | 57 (2.7)                                 |         |
| African                                            | 1178 (13.7%)                       | 519 (23.9)                              | 370 (16.8)                              | 211 (10.1)                             | 78 (3.6)                                 |         |
| Asian                                              | 1008 (11.7%)                       | 301 (13.9)                              | 283 (12.8)                              | 231 (11.1)                             | 193 (9.0)                                |         |
| Smoking                                            |                                    |                                         |                                         |                                        |                                          | <0.001  |
| Never smoked during pregnancy                      | 6256 (72.6%)                       | 1515 (69.8)                             | 1523 (69.0)                             | 1518 (72.6)                            | 1700 (79.1)                              |         |
| Smoked until pregnancy was known                   | 735 (8.5%)                         | 171 (7.9)                               | 183 (8.3)                               | 188 (9.0)                              | 193 (9.0)                                |         |
| Continued smoking in pregnancy                     | 1626 (18.9%)                       | 484 (22.3)                              | 502 (22.7)                              | 384 (18.4)                             | 256 (11.9)                               |         |
| Alcohol                                            |                                    |                                         |                                         |                                        |                                          | <0.001  |
| Never alcohol consumption in pregnancy             | 4351 (50.5%)                       | 1436 (66.2)                             | 1200 (54.4)                             | 990 (47.4)                             | 726 (33.8)                               |         |
| Alcohol consumption until pregnancy was known      | 1149 (13.3%)                       | 220 (10.1)                              | 239 (10.8)                              | 335 (16.0)                             | 354 (16.5)                               |         |

|  |                                            |              |             |             |             |             |                  |
|--|--------------------------------------------|--------------|-------------|-------------|-------------|-------------|------------------|
|  | Continued alcohol consumption in pregnancy | 3117 (36.2%) | 514 (23.7)  | 769 (34.8)) | 765 (36.6)  | 1069 (49.7) |                  |
|  | Folic acid supplement intake               |              |             |             |             |             | <b>&lt;0.001</b> |
|  | None                                       | 2751 (31.9%) | 1141 (52.6) | 843 (38.2)  | 534 (25.6)  | 233 (10.8)  |                  |
|  | Start in first 10 weeks of pregnancy       | 2661 (30.9%) | 594 (27.4)  | 703 (31.8)  | 650 (31.1)  | 714 (33.2)  |                  |
|  | Start preconceptionally                    | 3205 (37.2%) | 435 (20.0)  | 662 (30.0)  | 906 (43.3)  | 1202 (55.9) |                  |
|  | Fetal sex (male)                           | 4347 (50.4)  | 1063 (49.0) | 1147 (51.9) | 1066 (51.0) | 1071 (49.8) | 0.22             |

406 Data are represented as n (%), mean (SD) or median with the 90% range. Differences in baseline characteristics were tested using ANOVA, Kruskal-Wallis  
 407 tests and chi-square tests. Confounders are imputed. Non imputed percentages are valid percentages.



408 **Figure 2. Associations of neighbourhood deprivation with fetal growth.**

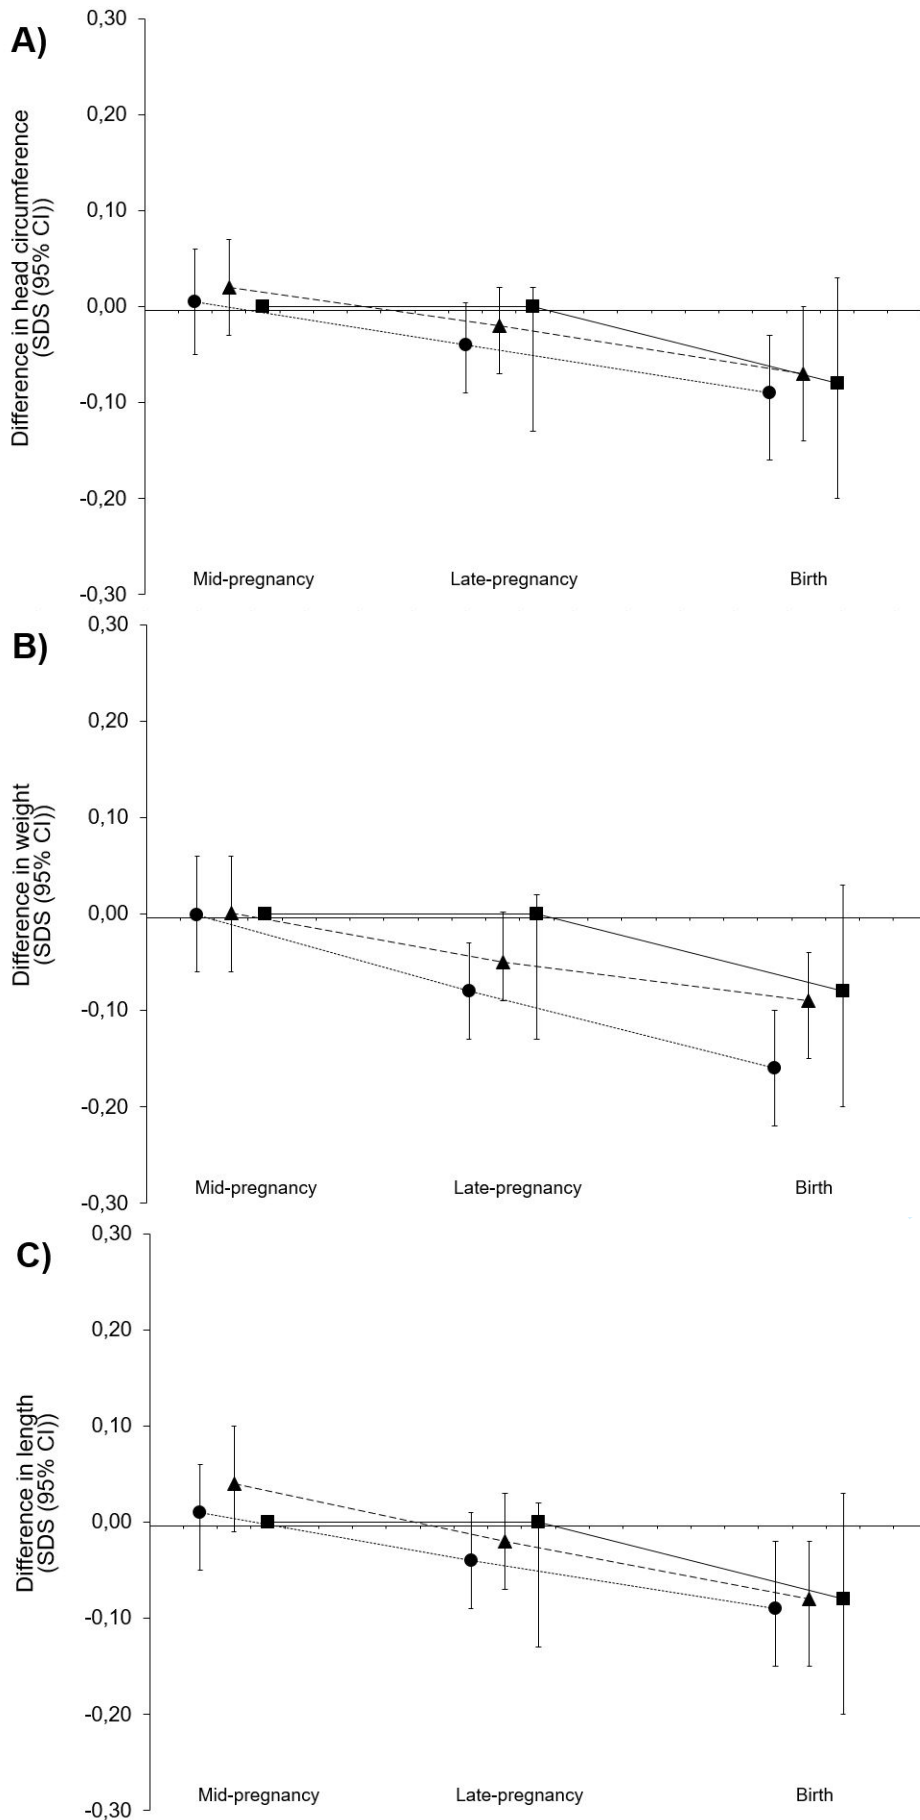

1  
2  
3 411 Differences in fetal growth rates for the lower three neighbourhood status score quartiles as compared  
4 412 to the highest neighbourhood status score. Squares represent the lowest quartile of the neighbourhood  
5 413 status score; circles represent the second quartile; and triangles the third quartile. Results are based on  
6 414 repeated measurement regression models and reflect the differences in gestational-age-adjusted SDS  
7 415 scores of (a) fetal head circumference, (b) weight, and (c) length growth for the three lower  
8 416 neighbourhood status score compared to the highest neighbourhood status score (reference group  
9 417 represented as zero line). The models were adjusted for maternal age, educational level, smoking,  
10 418 alcohol use, folic acid supplement use, ethnicity, parity, pre-pregnancy body mass index and fetal sex.  
11  
12  
13  
14  
15  
16  
17  
18  
19  
20  
21  
22  
23  
24  
25  
26  
27  
28  
29  
30  
31  
32  
33  
34  
35  
36  
37  
38  
39  
40  
41  
42  
43  
44  
45  
46  
47  
48  
49  
50  
51  
52  
53  
54  
55  
56  
57  
58  
59  
60

419

For peer review only

420 **Table 2.** Associations between the neighbourhood status score and adverse pregnancy outcomes.

| Study population                 | Model    | Lowest deprivation<br>quartile<br>n = 2277 | Second deprivation<br>quartile<br>n = 2123 | Third deprivation<br>quartile<br>n = 2084 | Highest deprivation<br>quartile<br>n = 2133 | Trend                     | p-value for trend |
|----------------------------------|----------|--------------------------------------------|--------------------------------------------|-------------------------------------------|---------------------------------------------|---------------------------|-------------------|
|                                  |          | $\beta$ / OR (95% CI)                      | $\beta$ / OR (95% CI)                      | $\beta$ / OR (95% CI)                     |                                             | $\beta$ / OR (95% CI)     |                   |
| <b>Small for gestational age</b> | Basic    | <b>1.80 (1.46 ; 2.22)</b>                  | <b>1.46 (1.17 ; 1.81)</b>                  | <b>1.31 (1.05 ; 1.64)</b>                 | <i>Reference</i>                            | <b>0.86 (0.81 ; 0.90)</b> | <b>&lt;0.001</b>  |
|                                  | Adjusted | <b>1.39 (1.09 ; 1.77)</b>                  | 1.14 (0.90 ; 1.44)                         | 1.13 (0.90 ; 1.42)                        | <i>Reference</i>                            | <b>0.91 (0.86 ; 0.97)</b> | <b>0.003</b>      |
| <b>Preterm birth</b>             | Basic    | <b>1.60 (1.21 ; 2.13)</b>                  | <b>1.76 (1.33 ; 2.32)</b>                  | <b>1.41 (1.05 ; 1.89)</b>                 | <i>Reference</i>                            | <b>0.88 (0.83 ; 0.95)</b> | <b>&lt;0.001</b>  |
|                                  | Adjusted | <b>1.52 (1.11 ; 2.09)</b>                  | <b>1.65 (1.23 ; 2.22)</b>                  | 1.32 (0.97 ; 1.77)                        | <i>Reference</i>                            | <b>0.89 (0.82 ; 0.96)</b> | <b>0.004</b>      |

421 Abbreviations:  $\beta$ : beta; OR: odds ratio. Values are odds ratios with the 95% CI of the data in SD-score and are based on logistic regression models. Basic  
 422 model: by the use of SD scores it is automatically adjusted for gestational age. Adjusted model: basic model and additionally adjusted for maternal age,  
 423 educational level, smoking, alcohol use, folic acid supplement use, ethnicity, parity, pre-pregnancy body mass index and fetal sex. p-for trend analysis with the  
 424 neighbourhood deprivation as a continuous measure. Small size for gestational age (SGA) at birth was defined as a sex and gestational age adjusted  
 425 birthweight below the 10th percentile (<-1.40 SD-score) in the study cohort. Preterm birth (PTB) was defined as a gestational age of <37 weeks at delivery.

426 **References**

- 427 1. Mackenbach JP, Cavelaars AE, Kunst AE, Groenhouf F. Socioeconomic inequalities in  
428 cardiovascular disease mortality; an international study. *Eur Heart J*. 2000;21(14):1141-51.
- 429 2. Pickett KE, Pearl M. Multilevel analyses of neighbourhood socioeconomic context and health  
430 outcomes: a critical review. *J Epidemiol Community Health*. 2001;55(2):111-22.
- 431 3. Vos AA, Posthumus AG, Bonsel GJ, Steegers EA, Denktas S. Deprived neighborhoods and  
432 adverse perinatal outcome: a systematic review and meta-analysis. *Acta Obstet Gynecol Scand*.  
433 2014;93(8):727-40.
- 434 4. de Graaf JP, Ravelli AC, de Haan MA, Steegers EA, Bonsel GJ. Living in deprived urban districts  
435 increases perinatal health inequalities. *J Matern Fetal Neonatal Med*. 2013;26(5):473-81.
- 436 5. Timmermans S, Bonsel GJ, Steegers-Theunissen RP, Mackenbach JP, Steyerberg EW, Raat H,  
437 et al. Individual accumulation of heterogeneous risks explains perinatal inequalities within deprived  
438 neighbourhoods. *Eur J Epidemiol*. 2011;26(2):165-80.
- 439 6. Mook-Kanamori DO, Steegers EA, Eilers PH, Raat H, Hofman A, Jaddoe VW. Risk factors and  
440 outcomes associated with first-trimester fetal growth restriction. *JAMA*. 2010;303(6):527-34.
- 441 7. Barker DJ. Fetal origins of coronary heart disease. *BMJ*. 1995;311(6998):171-4.
- 442 8. Kooijman MN, Kruithof CJ, van Duijn CM, Duijts L, Franco OH, van IMH, et al. The Generation  
443 R Study: design and cohort update 2017. *Eur J Epidemiol*. 2016;31(12):1243-64.
- 444 9. National Institute for Public Health and the Environment. Sociaaleconomische status 2017  
445 [Available from: [https://www.volksgezondheidenzorg.info/onderwerp/sociaaleconomische-  
446 status/regionaal-internationaal/regionaal#node-sociaaleconomische-status](https://www.volksgezondheidenzorg.info/onderwerp/sociaaleconomische-status/regionaal-internationaal/regionaal#node-sociaaleconomische-status). .
- 447 10. Blaas HG, Eik-Nes SH, Bremnes JB. The growth of the human embryo. A longitudinal  
448 biometric assessment from 7 to 12 weeks of gestation. *Ultrasound Obstet Gynecol*. 1998;12(5):346-  
449 54.
- 450 11. van Uitert EM, Exalto N, Burton GJ, Willemsen SP, Koning AH, Eilers PH, et al. Human  
451 embryonic growth trajectories and associations with fetal growth and birthweight. *Hum Reprod*.  
452 2013;28(7):1753-61.
- 453 12. Hadlock FP, Harrist RB, Sharman RS, Deter RL, Park SK. Estimation of fetal weight with the use  
454 of head, body, and femur measurements--a prospective study. *Am J Obstet Gynecol*.  
455 1985;151(3):333-7.
- 456 13. Verburg BO, Steegers EA, De Ridder M, Snijders RJ, Smith E, Hofman A, et al. New charts for  
457 ultrasound dating of pregnancy and assessment of fetal growth: longitudinal data from a population-  
458 based cohort study. *Ultrasound Obstet Gynecol*. 2008;31(4):388-96.
- 459 14. Niklasson A, Ericson A, Fryer JG, Karlberg J, Lawrence C, Karlberg P. An update of the Swedish  
460 reference standards for weight, length and head circumference at birth for given gestational age  
461 (1977-1981). *Acta Paediatr Scand*. 1991;80(8-9):756-62.
- 462 15. Twisk JWR. *Applied Longitudinal Data Analysis for Epidemiology: A Practical Guide*. 2 ed.  
463 Cambridge: Cambridge University Press; 2013.
- 464 16. Verburg BO, Mulder PG, Hofman A, Jaddoe VW, Witteman JC, Steegers EA. Intra- and  
465 interobserver reproducibility study of early fetal growth parameters. *Prenat Diagn*. 2008;28(4):323-  
466 31.
- 467 17. Sterne JA, White IR, Carlin JB, Spratt M, Royston P, Kenward MG, et al. Multiple imputation  
468 for missing data in epidemiological and clinical research: potential and pitfalls. *BMJ*. 2009;338:b2393.
- 469 18. DG Altman. *Practical statistics for medical research*. . London, UK: Chapman & Hall; 1999.
- 470 19. de Graaf JP, Steegers EA, Bonsel GJ. Inequalities in perinatal and maternal health. *Curr Opin  
471 Obstet Gynecol*. 2013;25(2):98-108.
- 472 20. Van Dijk MR, Borggreven NV, Willemsen SP, Koning AHJ, Steegers-Theunissen RPM, Koster  
473 MPH. Maternal Lifestyle Impairs Embryonic Growth: The Rotterdam Periconception Cohort. *Reprod  
474 Sci*. 2018;25(6):916-22.

- 1  
2  
3 475 21. Posthumus AG, Birnie E, van Veen MJ, Steegers EA, Bonsel GJ. An antenatal prediction model  
4 476 for adverse birth outcomes in an urban population: The contribution of medical and non-medical  
5 477 risks. *Midwifery*. 2016;38:78-86.
- 6 478 22. Agyemang C, Vrijkotte TG, Droomers M, van der Wal MF, Bonsel GJ, Stronks K. The effect of  
7 479 neighbourhood income and deprivation on pregnancy outcomes in Amsterdam, The Netherlands. *J*  
8 480 *Epidemiol Community Health*. 2009;63(9):755-60.
- 9 481 23. Jokela M. Does neighbourhood deprivation cause poor health? Within-individual analysis of  
10 482 movers in a prospective cohort study. *J Epidemiol Community Health*. 2015;69(9):899-904.
- 11 483 24. Cohen S, Janicki-Deverts D, Miller GE. Psychological stress and disease. *JAMA*.  
12 484 2007;298(14):1685-7.
- 13 485 25. Vehmeijer FOL, Guxens M, Duijts L, El Marroun H. Maternal psychological distress during  
14 486 pregnancy and childhood health outcomes: a narrative review. *J Dev Orig Health Dis*. 2019;10(3):274-  
15 487 85.
- 16 488 26. Henrichs J, Schenk JJ, Roza SJ, van den Berg MP, Schmidt HG, Steegers EA, et al. Maternal  
17 489 psychological distress and fetal growth trajectories: the Generation R Study. *Psychol Med*.  
18 490 2010;40(4):633-43.
- 19 491 27. Burton GJ, Hempstock J, Jauniaux E. Nutrition of the human fetus during the first trimester--a  
20 492 review. *Placenta*. 2001;22 Suppl A:S70-7.
- 21 493 28. Gootjes DV, Koster MPH, Willemsen SP, Koning AHJ, Steegers EAP, Steegers-Theunissen RPM.  
22 494 The Impact of Neighbourhood Deprivation on Embryonic Growth Trajectories: Rotterdam  
23 495 Periconception Cohort. *J Clin Med*. 2019;8(11).
- 24 496 29. Rajaratnam JK, Burke JG, O'Campo P. Maternal and child health and neighborhood context:  
25 497 the selection and construction of area-level variables. *Health Place*. 2006;12(4):547-56.
- 26 498 30. Noble M, Wright G, Smith G, Dibben C. Measuring Multiple Deprivation at the Small-Area  
27 499 Level. *Environment and Planning A: Economy and Space*. 2006;38(1):169-85.
- 28 500 31. Jarman B. Underprivileged areas: validation and distribution of scores. *Br Med J (Clin Res Ed)*.  
29 501 1984;289(6458):1587-92.
- 30 502 32. Kang H-G, Joo HH, Choi KD, Lee D, Moon J. Complementarity in dietary supplements and  
31 503 foods: are supplement users vegetable eaters? *Food Nutr Res*. 2017;61(1):1361769-.
- 32 504 33. Kirk SF, Cade JE, Barrett JH, Conner M. Diet and lifestyle characteristics associated with  
33 505 dietary supplement use in women. *Public Health Nutr*. 1999;2(1):69-73.
- 34 506 34. Reitsma JB, Kardaun JW, Gevers E, de Bruin A, van der Wal J, Bonsel GJ. [Possibilities for  
35 507 anonymous follow-up studies of patients in Dutch national medical registrations using the Municipal  
36 508 Population Register: a pilot study]
- 37 509 Mogelijkheden voor anoniem follow-uponderzoek van patienten in landelijke medische registraties  
38 510 met behulp van de Gemeentelijke Basisadministratie: een pilotonderzoek. *Ned Tijdschr Geneeskd*.  
39 511 2003;147(46):2286-90.
- 40 512 35. Waelput AJM, Sijpkens MK, Lagendijk J, van Minde MRC, Raat H, Ernst-Smelt HE, et al.  
41 513 Geographical differences in perinatal health and child welfare in the Netherlands: rationale for the  
42 514 healthy pregnancy 4 all-2 program. *BMC Pregnancy Childbirth*. 2017;17(1):254.
- 43 515 36. Lagendijk J, Vos AA, Bertens LCM, Denktas S, Bonsel GJ, Steyerberg EW, et al. Antenatal non-  
44 516 medical risk assessment and care pathways to improve pregnancy outcomes: a cluster randomised  
45 517 controlled trial. *Eur J Epidemiol*. 2018;33(6):579-89.
- 46 518 37. Steegers EAP, Barker ME, Steegers-Theunissen RPM, Williams MA. Societal Valorisation of  
47 519 New Knowledge to Improve Perinatal Health: Time to Act. *Paediatric and perinatal epidemiology*.  
48 520 2016;30(2):201-4.
- 49 521 38. van Voorst SF, Vos AA, de Jong-Potjer LC, Waelput AJM, Steegers EAP, Denktas S.  
50 522 Effectiveness of general preconception care accompanied by a recruitment approach: protocol of a  
51 523 community-based cohort study (the Healthy Pregnancy 4 All study). *BMJ open*. 2015;5(3):e006284-e.  
52 524

1 **Supplemental data**2 **Supplemental Table 1.** Fetal growth and adverse pregnancy outcomes in the study population, stratified for quartiles of neighbourhood deprivation.

|                        | n    | Study population<br>n = 8617 | n    | Lowest deprivation<br>quartile<br>n = 2170 | n    | Second deprivation<br>quartile<br>n = 2208 | n    | Third deprivation<br>quartile<br>n = 2090 | n    | Highest deprivation<br>quartile<br>n = 2149 | p-value <sup>1</sup> | p-value <sup>2</sup> |
|------------------------|------|------------------------------|------|--------------------------------------------|------|--------------------------------------------|------|-------------------------------------------|------|---------------------------------------------|----------------------|----------------------|
| <b>Early pregnancy</b> |      |                              |      |                                            |      |                                            |      |                                           |      |                                             |                      |                      |
| CRL                    | 1614 | -0.05 (1.06)                 | 287  | 0.03 (1.05)                                | 362  | -0.01 (1.07)                               | 418  | -0.01 (0.95)                              | 547  | 0.07 (0.87)                                 | 0.81                 | 0.63                 |
| HC                     | 5646 | -0.27 (1.39)                 | 1359 | -0.04 (0.99)                               | 1440 | -0.04 (1.04)                               | 1361 | -0.04 (1.10)                              | 1486 | -0.09 (1.06)                                | 0.36                 | 0.20                 |
| FL                     | 4682 | 0.61 (0.88)                  | 1162 | -0.08 (0.99)                               | 1233 | -0.18 (1.00)                               | 1107 | -0.04 (0.98)                              | 1180 | -0.10 (1.00)                                | 0.18                 | 0.74                 |
| <b>Mid pregnancy</b>   |      |                              |      |                                            |      |                                            |      |                                           |      |                                             |                      |                      |
| HC                     | 8035 | -0.02 (1.02)                 | 1972 | -0.06 (1.03)                               | 2049 | -0.04 (1.05)                               | 1973 | -0.01 (1.02)                              | 2041 | 0.03 (0.98)                                 | <b>0.047</b>         | <b>0.01</b>          |
| FL                     | 8058 | 0.03 (1.03)                  | 1985 | 0.06 (1.07)                                | 2046 | 0.06 (1.08)                                | 1970 | 0.04 (1.02)                               | 2057 | -0.01 (0.97)                                | 0.12                 | <b>0.03</b>          |
| AC                     | 8052 | 0.01 (1.01)                  | 1977 | -0.04 (1.02)                               | 2050 | -0.04 (1.02)                               | 1971 | 0.02 (1.00)                               | 2054 | 0.11 (0.98)                                 | <b>&lt;0.001</b>     | <b>&lt;0.001</b>     |
| EFW                    | 8016 | -0.10 (1.01)                 | 1975 | -0.12 (1.02)                               | 2035 | -0.12 (1.04)                               | 1957 | -0.09 (1.00)                              | 2049 | -0.06 (0.97)                                | 0.22                 | 0.08                 |
| <b>Late pregnancy</b>  |      |                              |      |                                            |      |                                            |      |                                           |      |                                             |                      |                      |
| HC                     | 8163 | 0.01 (1.00)                  | 2029 | -0.08 (1.00)                               | 2067 | -0.09 (1.02)                               | 1984 | 0.06 (1.00)                               | 2083 | 0.17 (0.96)                                 | <b>&lt;0.001</b>     | <b>&lt;0.001</b>     |
| FL                     | 8234 | -0.01 (1.00)                 | 2049 | -0.04 (1.00)                               | 2083 | -0.01 (1.05)                               | 2005 | 0.004 (1.00)                              | 2097 | 0.02 (0.97)                                 | 0.28                 | 0.06                 |
| AC                     | 8212 | 0.01 (1.01)                  | 2042 | -0.10 (1.01)                               | 2076 | -0.07 (1.04)                               | 1995 | 0.04 (1.01)                               | 2099 | 0.14 (0.97)                                 | <b>&lt;0.001</b>     | <b>&lt;0.001</b>     |
| EFW                    | 8201 | 0.03 (1.02)                  | 2042 | -0.06 (1.01)                               | 2073 | -0.02 (1.04)                               | 1993 | 0.07 (1.00)                               | 2093 | 0.15 (1.00)                                 | <b>&lt;0.001</b>     | <b>&lt;0.001</b>     |

**Birth**

|                           |     |            |     |             |     |             |     |            |     |            |                  |                  |
|---------------------------|-----|------------|-----|-------------|-----|-------------|-----|------------|-----|------------|------------------|------------------|
| Small for gestational age | 824 | 854 (9.9%) | 261 | 261 (12.2%) | 220 | 225 (10.1%) | 190 | 190 (9.2%) | 153 | 153 (7.1%) | <b>&lt;0.001</b> | <b>&lt;0.001</b> |
| Preterm birth             | 460 | 460 (5.3%) | 128 | 128 (5.9%)  | 142 | 142 (6.4%)  | 109 | 109 (5.2%) | 81  | 81 (3.8%)  | <b>0.001</b>     | <b>0.001</b>     |

3 Abbreviations: SD: standard deviation. HC: head circumference. FL: femur length. AC: abdominal circumference. EFW: estimated fetal weight. Values  
4 represent data in SD-score, mean (SD) or n (%).<sup>1</sup> Differences between groups were evaluated using one-way-ANOVA-tests for continuous variables and Chi-  
5 square tests for proportions. <sup>2</sup>Differences in growth parameters between the lowest and highest neighbourhood status score groups were tested were evaluated  
6 using Student’s t-tests. Percentages are valid percentages.

8 **Supplemental Table 2. Regression coefficients of longitudinal associations between quartiles of neighbourhood deprivation with fetal growth**  
 9 **patterns.**

|                                  | Intercept                   | Slope                          | Intercept                   | Slope                          | Intercept                    | Slope                          |
|----------------------------------|-----------------------------|--------------------------------|-----------------------------|--------------------------------|------------------------------|--------------------------------|
|                                  | Head circumference          | Head circumference             | Length                      | Length                         | Weight                       | Weight                         |
|                                  | (SDS)                       | (SDS)                          | (SDS)                       | (SDS)                          | (SDS)                        | (SDS)                          |
| <b>Neighbourhood deprivation</b> |                             |                                |                             |                                |                              |                                |
| <b>Quartile 1</b>                | <b>0.225 (0.122; 0.328)</b> | <b>-0.010 (-0.013; -0.006)</b> | <b>0.270 (0.167; 0.373)</b> | <b>-0.012 (-0.016; -0.010)</b> | <b>0.229 (0.115; 0.3441)</b> | <b>-0.011 (-0.015; -0.008)</b> |
| <b>Quartile 2</b>                | <b>0.104 (0.004; 0.204)</b> | <b>-0.005 (-0.008; -0.001)</b> | <b>0.103 (0.003; 0.203)</b> | <b>-0.005 (-0.008; -0.001)</b> | <b>0.155 (0.043; 0.268)</b>  | <b>-0.008 (-0.011; -0.005)</b> |
| <b>Quartile 3</b>                | <b>0.109 (0.009; 0.208)</b> | <b>-0.004 (-0.008; -0.001)</b> | <b>0.170 (0.071; 0.270)</b> | <b>-0.006 (-0.010; -0.003)</b> | <b>0.095 (-0.018; 0.208)</b> | <b>-0.005 (-0.008; -0.001)</b> |
| <b>Quartile 4</b>                | Ref.                        | Ref.                           | Ref.                        | Ref.                           | Ref.                         | Ref.                           |

10 Values are regression coefficients obtained from linear repeated measurement models and reflect the (gestational) age independent differences (intercepts) and  
 11 the gestational age dependent differences (slopes: change in growth characteristics SDS per week per quartile of the neighbourhood deprivation score,  
 12 compared with the highest quartile of the neighbourhood deprivation score as the reference group, adjusted for maternal age, educational level, smoking,  
 13 alcohol use, folic acid supplement use, ethnicity, parity, pre-pregnancy body mass index and fetal sex.)



14 **Supplemental Figure 1.** Associations between neighbourhood deprivation with first trimester and  
15 fetal growth measurements.

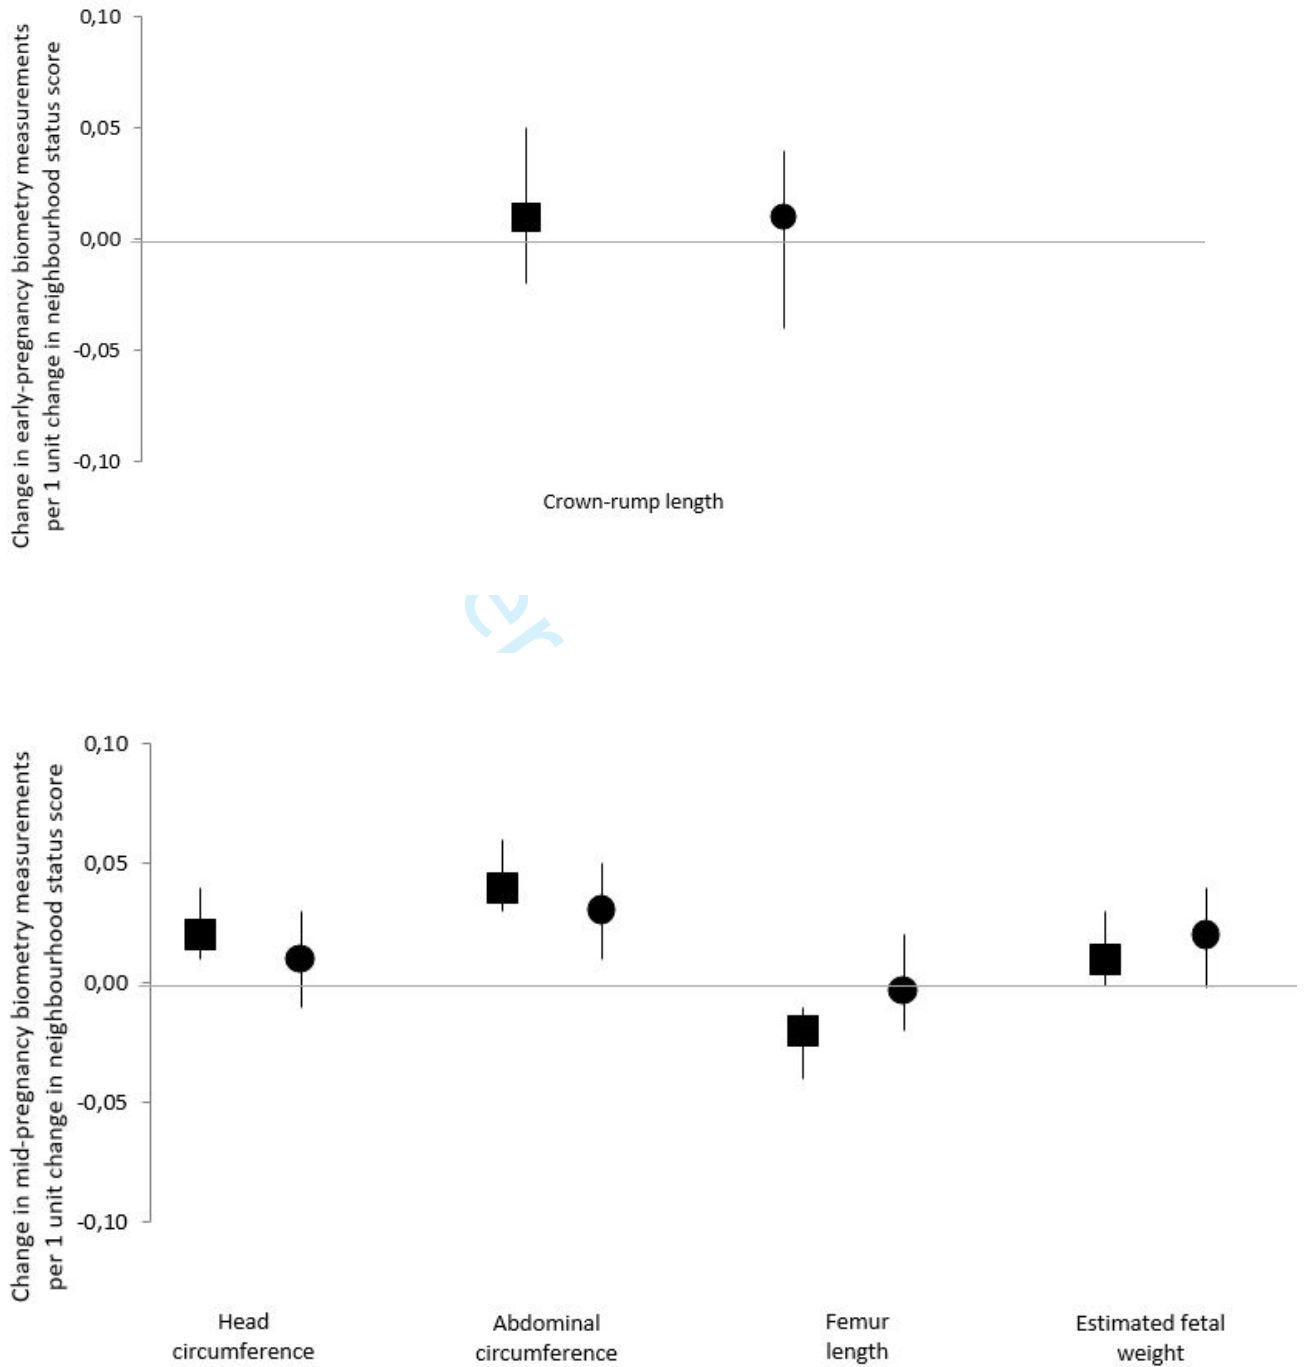

16

17

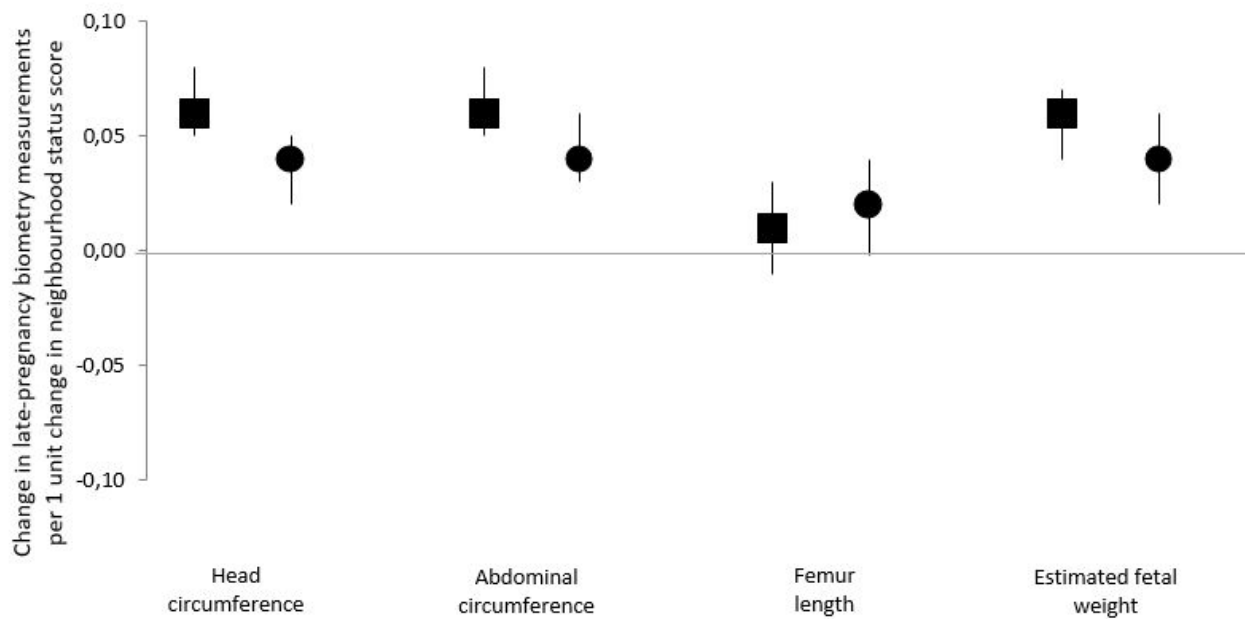

18

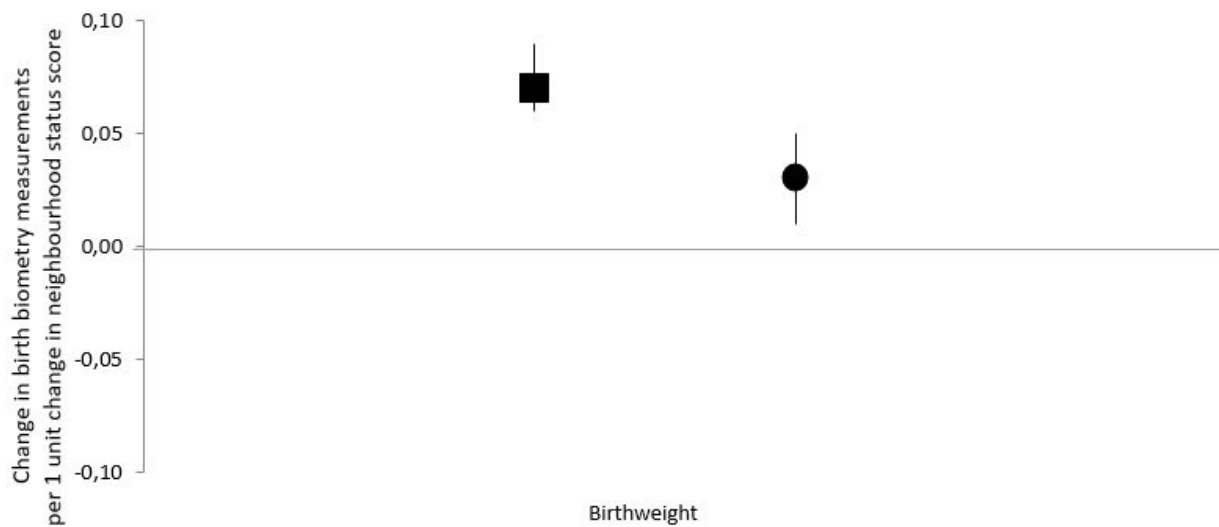

19 Data are SDS values (95% CI) from linear regression models that reflect the differences in growth  
 20 characteristics in SDS's in early pregnancy, mid-pregnancy late pregnancy and birth, per 1 unit change  
 21 in neighbourhood status score. Analyses with crown-rump length were based on subgroup analyses (n  
 22 = 1614). Estimates are from multiple imputed data. Squares show basic model; circles show the  
 23 adjusted model: basic model and additionally adjusted for maternal age, educational level, smoking,  
 24 alcohol use, folic acid supplement use, ethnicity, parity, pre-pregnancy body mass index and fetal sex.

25 **Supplemental Table 3.** P-value of interaction terms (neighbourhood deprivation \* parity and  
 26 neighbourhood deprivation \* complications in a previous pregnancy).

| <b>Study population</b> |                          |                                              |
|-------------------------|--------------------------|----------------------------------------------|
| <b>n = 8617</b>         |                          |                                              |
|                         | <b>Parity</b>            | <b>Complications in a previous pregnancy</b> |
|                         | <b>p-value for trend</b> | <b>p-value for trend</b>                     |
| <b>Early pregnancy</b>  |                          |                                              |
| CRL                     | 0.44                     | 0.36                                         |
| HC                      | 0.25                     | 0.24                                         |
| FL                      | 0.52                     | 0.91                                         |
| <b>Mid pregnancy</b>    |                          |                                              |
| HC                      | 0.15                     | 0.20                                         |
| FL                      | 0.13                     | 0.20                                         |
| AC                      | 0.73                     | 0.81                                         |
| EFW                     | 0.27                     | 0.34                                         |
| <b>Late pregnancy</b>   |                          |                                              |
| HC                      | 0.64                     | 0.62                                         |
| FL                      | 0.58                     | 0.51                                         |
| AC                      | 0.66                     | 0.88                                         |
| EFW                     | 0.82                     | 0.99                                         |
| <b>Birth</b>            |                          |                                              |
| SGA                     | 0.95                     | 0.85                                         |
| PTB                     | 0.17                     | <b>0.03</b>                                  |

27 Abbreviations:  $\beta$ : beta; CRL: crown-rump length; HC: head circumference; FL: femur length; AC:  
 28 abdominal circumference; EFW: estimated fetal weight. Values are based on the adjusted linear and  
 29 logistic regression models.

30 **Supplemental Table 4.** Associations between the neighbourhood status score and fetal growth and adverse pregnancy outcomes, split for nulliparous women,  
 31 multiparous women without a complications in a previous pregnancy or multiparous women with a complications in a previous pregnancy.

| Study population       | Nulliparous<br>n = 8617    |                   | Multiparous, no complications previous pregnancy<br>N = 3166 |                   | Multiparous, complications previous pregnancy<br>N = 606 |                   |
|------------------------|----------------------------|-------------------|--------------------------------------------------------------|-------------------|----------------------------------------------------------|-------------------|
|                        | Trend                      |                   | Trend                                                        |                   | Trend                                                    |                   |
|                        | $\beta$ /OR (95% CI)       | p-value for trend | $\beta$ /OR (95% CI)                                         | p-value for trend | $\beta$ /OR (95% CI)                                     | p-value for trend |
| <b>Early pregnancy</b> |                            |                   |                                                              |                   |                                                          |                   |
| CRL                    | 0.02 (-0.04 ; 0.08)        | 0.42              | -0.01 (-0.10 ; 0.07)                                         | 0.74              | 0.02 (-0.19 ; 0.22)                                      | 0.88              |
| HC                     | 0.004 (-0.03 ; 0.04)       | 0.84              | -0.01 (-0.05 ; 0.04)                                         | 0.73              | -0.04 (-0.15 ; 0.07)                                     | 0.45              |
| FL                     | 0.03 (-0.01 ; 0.07)        | 0.09              | 0.04 (-0.01 ; 0.09)                                          | 0.09              | -0.04 (-0.15 ; 0.07)                                     | 0.50              |
| <b>Mid pregnancy</b>   |                            |                   |                                                              |                   |                                                          |                   |
| HC                     | 0.02 (-0.02 ; 0.05)        | 0.32              | 0.02 (-0.02 ; 0.06)                                          | 0.30              | <b>-0.11 (-0.19 ; -0.03)</b>                             | <b>0.01</b>       |
| FL                     | 0.01 (-0.02 ; 0.04)        | 0.66              | -0.01 (-0.05 ; 0.03)                                         | 0.59              | -0.06 (-0.15 ; 0.02)                                     | 0.14              |
| AC                     | <b>0.03 (0.002 ; 0.06)</b> | <b>0.03</b>       | <b>0.05 (0.01 ; 0.09)</b>                                    | <b>0.01</b>       | -0.02 (-0.11 ; 0.07)                                     | 0.66              |
| EFW                    | 0.02 (-0.01 ; 0.05)        | 0.12              | 0.03 (-0.01 ; 0.07)                                          | 0.18              | -0.04 (-0.13 ; 0.04)                                     | 0.32              |
| <b>Late pregnancy</b>  |                            |                   |                                                              |                   |                                                          |                   |
| HC                     | <b>0.04 (0.01 ; 0.07)</b>  | <b>0.004</b>      | 0.03 (-0.003 ; 0.07)                                         | 0.07              | 0.03 (-0.05 ; 0.11)                                      | 0.50              |
| FL                     | 0.02 (-0.01 ; 0.05)        | 0.10              | -0.003 (-0.04 ; 0.03)                                        | 0.89              | 0.03 (-0.05 ; 0.11)                                      | 0.45              |

|              |                            |             |                            |              |                     |      |
|--------------|----------------------------|-------------|----------------------------|--------------|---------------------|------|
| AC           | <b>0.03 (0.002 ; 0.06)</b> | <b>0.04</b> | <b>0.04 (0.01 ; 0.08)</b>  | <b>0.03</b>  | 0.07 (-0.01 ; 0.16) | 0.10 |
| EFW          | <b>0.03 (0.01 ; 0.06)</b>  | <b>0.02</b> | <b>0.04 (0.001 ; 0.08)</b> | <b>0.048</b> | 0.07 (-0.02 ; 0.16) | 0.11 |
| <b>Birth</b> |                            |             |                            |              |                     |      |
| SGA          | <b>0.90 (0.82 ; 0.99)</b>  | <b>0.03</b> | 0.96 (0.82 ; 1.12)         | 0.60         | 0.88 (0.63 ; 1.23)  | 0.46 |
| PTB          | 0.91 (0.81 ; 1.03)         | 0.15        | <b>0.73 (0.58 ; 0.93)</b>  | <b>0.01</b>  | 0.89 (0.66 ; 1.21)  | 0.46 |

32 Abbreviations:  $\beta$ : beta; CRL: crown-rump length; HC: head circumference; FL: femur length; AC: abdominal circumference; EFW: estimated fetal weight.  
 33 Values are regression coefficients with the 95% CI of the data in SD-score and are based on adjusted linear and logistic regression models. Adjusted model:  
 34 adjusted for maternal age, educational level, smoking, alcohol use, folic acid supplement use, ethnicity, parity, pre-pregnancy body mass index and fetal sex.  
 35 p-for trend analysis with the neighbourhood deprivation as a continuous measure.

36 **Supplemental Figure 2.** Multilevel regression analysis of associations between the neighbourhood  
 37 deprivation and first trimester and fetal growth measurements.

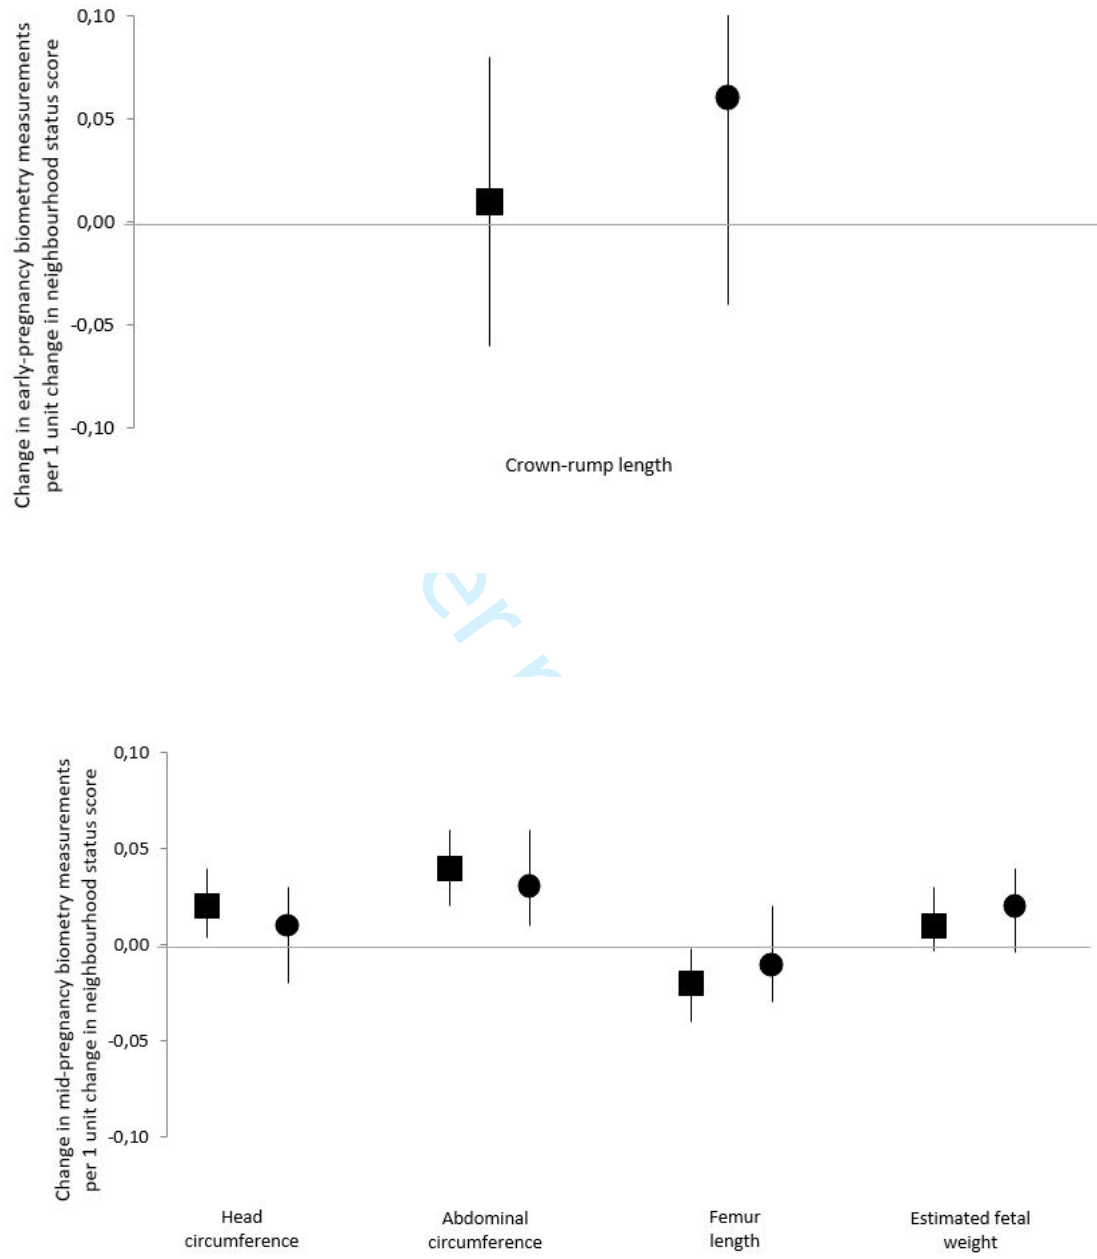

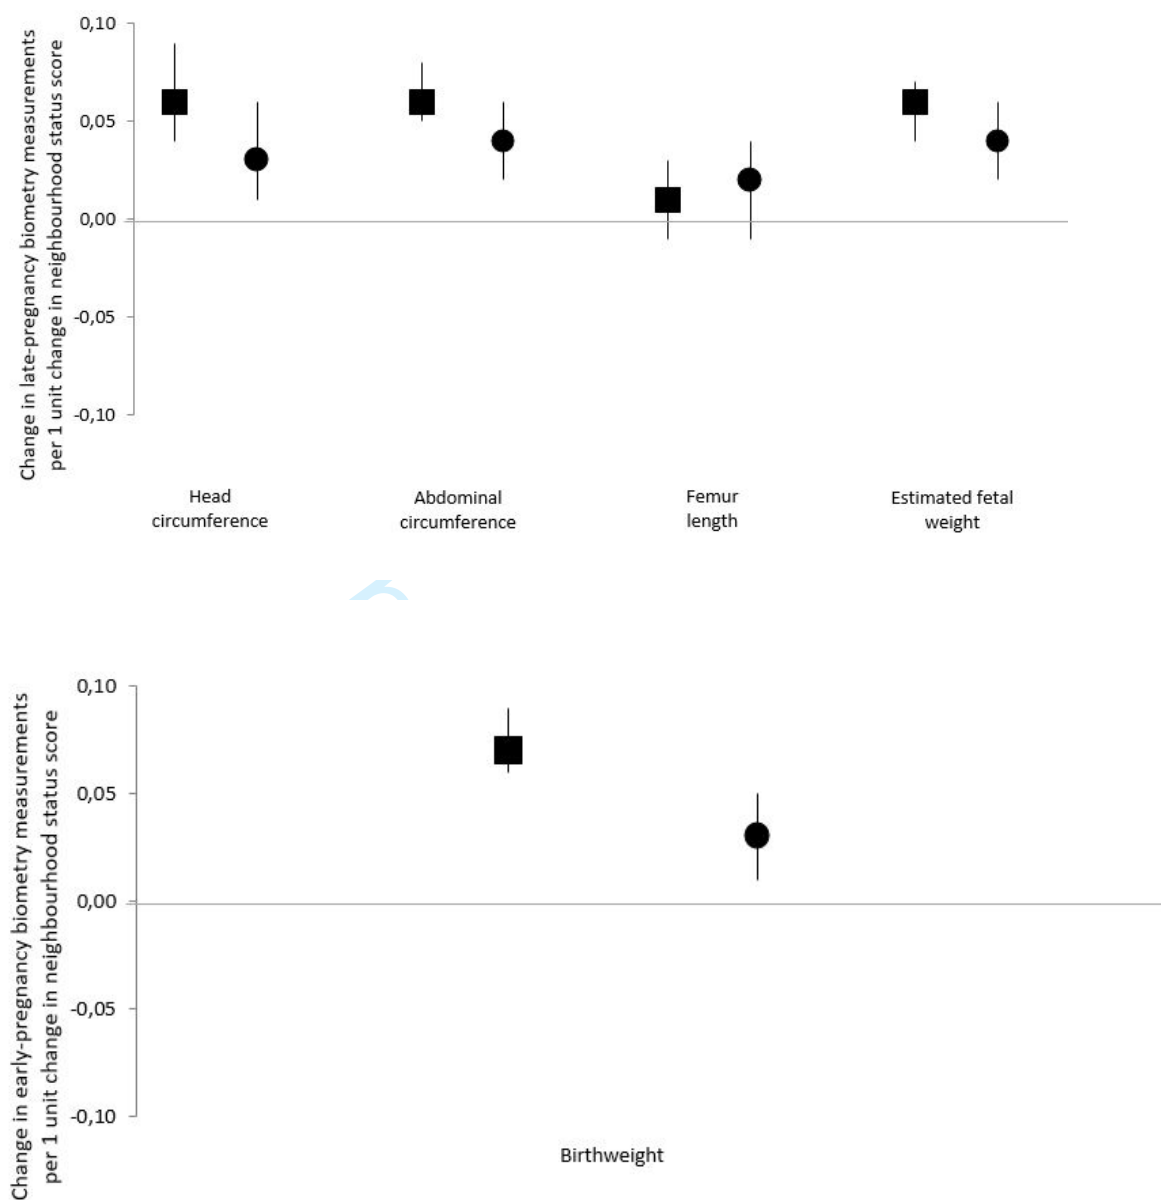

65 Data are SDS values (95% CI) from multilevel analyses and reflect the differences in growth  
 66 characteristics in SDS's in early pregnancy, mid-pregnancy late pregnancy and birth, per 1 unit change  
 67 in neighbourhood status score. Analyses with crown-rump length were based on subgroup analyses (n  
 68 = 1614). Estimates are from multiple imputed data. Squares show basic model. Circles show adjusted  
 69 model: basic model and additionally adjusted for maternal age, educational level, smoking, alcohol  
 70 use, folic acid supplement use, ethnicity, parity, pre-pregnancy body mass index and fetal sex.

71 **Supplemental Table 5.** Sensitivity analysis with all available CRL measurements in the study population.

72 **a. All CRL measurement in the study population, stratified for quartiles of the neighbourhood status score.**

|     | n    | Study population<br>n = 8617 | n   | Lowest deprivation quartile<br>n = 2277 | n   | Second deprivation quartile<br>n = 2123 | n   | Third deprivation quartile<br>n = 2084 | n   | Highest deprivation quartile<br>n = 2133 | p-value <sup>1</sup> | Mean difference (95% CI) <sup>2</sup> | p-value <sup>2</sup> |
|-----|------|------------------------------|-----|-----------------------------------------|-----|-----------------------------------------|-----|----------------------------------------|-----|------------------------------------------|----------------------|---------------------------------------|----------------------|
| CRL | 1614 |                              | 287 | 0.03 (1.05)                             | 362 | -0.01 (1.07)                            | 418 | -0.01 (0.95)                           | 547 | 0.07 (0.87)                              | 0.56                 | -0.03 (-0.17 ; 0.10)                  | 0.61                 |

73

74

75

76

77 **b. All CRL measurement in the study population and the associations between quartiles of the neighbourhood status score.**

|     | n    | Model    | Lowest deprivation quartile<br>n = 300 | Second deprivation quartile<br>n = 373 | Third deprivation quartile<br>n = 399 | Highest deprivation quartile<br>n = 542 | Trend                | p-value for trend |
|-----|------|----------|----------------------------------------|----------------------------------------|---------------------------------------|-----------------------------------------|----------------------|-------------------|
|     |      |          | $\beta$ (95% CI)                       | $\beta$ (95% CI)                       | $\beta$ (95% CI)                      |                                         | $\beta$ (95% CI)     |                   |
| CRL | 1614 | Basic    | -0.03 (-0.17 ; 0.10)                   | -0.08 (-0.21 ; 0.05)                   | -0.08 (-0.20 ; 0.05)                  | Reference                               | 0.01 (-0.02 ; 0.05)  | 0.48              |
|     |      | Adjusted | 0.02 (-0.15 ; 0.16)                    | -0.04 (-0.17 ; 0.10)                   | -0.06 (-0.19 ; 0.06)                  | Reference                               | 0.004 (-0.04 ; 0.04) | 0.85              |

78

79



80 c. All CRL measurement in the study population and the associations between quartiles of the neighbourhood status score. Complete case analysis.

|     | n    | Model    | Lowest deprivation quartile<br>n = 2268 | Second deprivation quartile<br>n = 2118 | Third deprivation quartile<br>n = 2081 | Highest deprivation quartile<br>n = 2131 | Trend               | p-value for trend |
|-----|------|----------|-----------------------------------------|-----------------------------------------|----------------------------------------|------------------------------------------|---------------------|-------------------|
|     |      |          | $\beta$ (95% CI)                        | $\beta$ (95% CI)                        | $\beta$ (95% CI)                       |                                          | $\beta$ (95% CI)    |                   |
| CRL | 1143 | Adjusted | -0.06 (-0.23 ; 0.12)                    | 0.02 (-0.14 ; 0.17)                     | -0.06 (-0.21 ; 0.09)                   | Reference                                | 0.01 (-0.04 ; 0.05) | 0.80              |

81

82

83 d. The association between the neighbourhood deprivation status score and all CRL measurement in the study population in a selected cohort of non-SGA pregnancies.  
84

|     | n   | Model    | Lowest deprivation quartile<br>n = 2268 | Second deprivation quartile<br>n = 2118 | Third deprivation quartile<br>n = 2081 | Highest deprivation quartile<br>n = 2131 | Trend                | p-value for trend |
|-----|-----|----------|-----------------------------------------|-----------------------------------------|----------------------------------------|------------------------------------------|----------------------|-------------------|
|     |     |          | $\beta$ (95% CI)                        | $\beta$ (95% CI)                        | $\beta$ (95% CI)                       |                                          | $\beta$ (95% CI)     |                   |
| CRL | 434 | Basic    | 0.05 (-0.26 ; 0.35)                     | 0.10 (-0.17 ; 0.37)                     | -0.05 (-0.31 ; 0.21)                   | Reference                                | -0.01 (-0.09 ; 0.06) | 0.73              |
|     |     | Adjusted | 0.07 (-0.30 ; 0.43)                     | 0.09 (-0.19 ; 0.38)                     | -0.06 (-0.33 ; 0.21)                   | Reference                                | -0.02 (-0.11 ; 0.08) | 0.75              |

85 Abbreviations:  $\beta$ : beta; CRL: crown-rump length. Values are regression coefficients with the 95% CI of the data in SD-score and are based on linear  
86 regression models. Basic model: by the use of SD scores it is automatically adjusted for gestational age. Fully adjusted model: basic model and additionally  
87 adjusted for maternal age, educational level, smoking, alcohol use, folic acid supplement use, ethnicity, parity, pre-pregnancy body mass index and fetal sex.  
88 p-for trend analysis with the neighbourhood deprivation as a continuous measure. <sup>1</sup>Differences between groups were evaluated using one-way-ANOVA-tests  
89 for continuous variables. <sup>2</sup>Differences in growth parameters between the lowest and highest neighbourhood status score groups were tested were evaluated  
90 using Student’s t-tests.

91 **Supplemental Table 6.** Associations between the neighbourhood status score and fetal growth in a selected cohort of non-SGA pregnancies.

| Study population<br>n = 7710 | Model    | Lowest deprivation<br>quartile<br>n = 2268 | Second deprivation<br>quartile<br>n = 2118 | Third deprivation<br>quartile<br>n = 2081 | Highest deprivation<br>quartile<br>n = 2131 | Trend                        |                   |
|------------------------------|----------|--------------------------------------------|--------------------------------------------|-------------------------------------------|---------------------------------------------|------------------------------|-------------------|
|                              |          | $\beta$ (95% CI)                           | $\beta$ (95% CI)                           | $\beta$ (95% CI)                          |                                             | $\beta$ (95% CI)             | p-value for trend |
| <b>Early pregnancy</b>       |          |                                            |                                            |                                           |                                             |                              |                   |
| CRL                          | Basic    | 0.05 (-0.26 ; 0.35)                        | 0.10 (-0.17 ; 0.37)                        | -0.05 (-0.31 ; 0.21)                      | <i>Reference</i>                            | -0.01 (-0.09 ; 0.06)         | 0.73              |
|                              | Adjusted | 0.07 (-0.30 ; 0.43)                        | 0.09 (-0.19 ; 0.38)                        | -0.06 (-0.33 ; 0.21)                      | <i>Reference</i>                            | -0.02 (-0.11 ; 0.08)         | 0.75              |
| HC                           | Basic    | <b>-0.38 (-0.71 ; -0.04)</b>               | <b>-0.37 (-0.69 ; -0.06)</b>               | -0.07 (-0.37 ; 0.23)                      | <i>Reference</i>                            | <b>0.12 (0.04 ; 0.21)</b>    | <b>0.004</b>      |
|                              | Adjusted | -0.22 (-0.60 ; 0.17)                       | -0.32 (-0.65 ; 0.01)                       | -0.06 (-0.36 ; 0.25)                      | <i>Reference</i>                            | 0.09 (-0.01 ; 0.19)          | 0.09              |
| FL                           | Basic    | -0.19 (-0.53 ; 0.15)                       | <b>-0.33 (-0.63 ; -0.03)</b>               | -0.11 (-0.40 ; 0.18)                      | <i>Reference</i>                            | 0.08 (-0.002 ; 0.16)         | 0.06              |
|                              | Adjusted | -0.24 (-0.66 ; 0.18)                       | <b>-0.36 (-0.69 ; -0.03)</b>               | -0.13 (-0.44 ; 0.18)                      | <i>Reference</i>                            | 0.10 (-0.01 ; 0.20)          | 0.07              |
| <b>Mid pregnancy</b>         |          |                                            |                                            |                                           |                                             |                              |                   |
| HC                           | Basic    | <b>-0.07 (-0.13 ; -0.001)</b>              | -0.05 (-0.12 ; 0.01)                       | -0.03 (-0.10 ; 0.04)                      | <i>Reference</i>                            | <b>0.02 (0.003 ; 0.04)</b>   | <b>0.02</b>       |
|                              | Adjusted | -0.02 (-0.10 ; 0.05)                       | -0.03 (-0.09 ; 0.04)                       | -0.02 (-0.09 ; 0.05)                      | <i>Reference</i>                            | 0.01 (-0.01 ; 0.03)          | 0.40              |
| FL                           | Basic    | <b>0.10 (0.045 ; 0.17)</b>                 | <b>0.10 (0.03 ; 0.16)</b>                  | <b>0.08 (0.01 ; 0.15)</b>                 | <i>Reference</i>                            | <b>-0.02 (-0.05 ; -0.01)</b> | <b>0.001</b>      |
|                              | Adjusted | 0.02 (-0.05 ; 0.10)                        | 0.05 (-0.03 ; 0.11)                        | 0.04 (-0.03 ; 0.11)                       | <i>Reference</i>                            | -0.01 (-0.03 ; 0.01)         | 0.42              |
| AC                           | Basic    | <b>-0.12 (-0.18 ; -0.05)</b>               | <b>-0.13 (-0.20 ; -0.07)</b>               | <b>-0.07 (-0.13 ; -0.01)</b>              | <i>Reference</i>                            | <b>0.04 (0.02 ; 0.05)</b>    | <b>&lt;0.001</b>  |

1  
2  
3  
4  
5  
6  
7  
8  
9  
10  
11  
12  
13  
14  
15  
16  
17  
18  
19  
20  
21  
22  
23  
24  
25  
26  
27  
28  
29  
30  
31  
32  
33  
34  
35  
36  
37  
38  
39  
40  
41  
42  
43  
44  
45  
46

|                       |          |                              |                              |                               |                  |                           |                  |
|-----------------------|----------|------------------------------|------------------------------|-------------------------------|------------------|---------------------------|------------------|
|                       | Adjusted | <b>-0.09 (-0.16 ; -0.01)</b> | <b>-0.11 (-0.18 ; -0.04)</b> | -0.06 (-0.12 ; 0.01)          | <i>Reference</i> | <b>0.03 (0.01 ; 0.05)</b> | <b>0.01</b>      |
| EFW                   | Basic    | -0.03 (-0.08 ; 0.05)         | -0.03 (-0.09 ; 0.04)         | 0.001 (-0.07 ; 0.06)          | <i>Reference</i> | 0.01 (-0.01 ; 0.02)       | 0.77             |
|                       | Adjusted | -0.04 (-0.12 ; 0.03)         | -0.04 (-0.11 ; 0.03)         | -0.01 (-0.08 ; 0.05)          | <i>Reference</i> | 0.01 (-0.01 ; 0.03)       | 0.19             |
| <hr/>                 |          |                              |                              |                               |                  |                           |                  |
| <b>Late pregnancy</b> |          |                              |                              |                               |                  |                           |                  |
| HC                    | Basic    | <b>-0.22 (-0.29 ; -0.16)</b> | <b>-0.24 (-0.31 ; -0.18)</b> | <b>-0.09 (-0.16 ; -0.03)</b>  | <i>Reference</i> | <b>0.06 (0.04 ; 0.08)</b> | <b>&lt;0.001</b> |
|                       | Adjusted | <b>-0.13 (-0.20 ; -0.06)</b> | <b>-0.18 (-0.24 ; -0.11)</b> | <b>-0.06 (-0.12 ; -0.001)</b> | <i>Reference</i> | <b>0.03 (0.01 ; 0.05)</b> | <b>&lt;0.001</b> |
| FL                    | Basic    | -0.02 (-0.09 ; 0.04)         | 0.01 (-0.05 ; 0.07)          | 0.01 (-0.05 ; 0.08)           | <i>Reference</i> | 0.001 (-0.02 ; 0.02)      | 0.90             |
|                       | Adjusted | <b>-0.08 (-0.15 ; -0.01)</b> | -0.01 (-0.08 ; 0.05)         | -0.01 (-0.07 ; 0.06)          | <i>Reference</i> | 0.01 (-0.01 ; 0.03)       | 0.20             |
| AC                    | Basic    | <b>-0.20 (-0.27 ; -0.14)</b> | <b>-0.18 (-0.24 ; -0.12)</b> | <b>-0.07 (-0.13 ; -0.01)</b>  | <i>Reference</i> | <b>0.06 (0.04 ; 0.07)</b> | <b>&lt;0.001</b> |
|                       | Adjusted | <b>-0.15 (-0.22 ; -0.08)</b> | <b>-0.13 (-0.19 ; -0.06)</b> | -0.05 (-0.12 ; 0.01)          | <i>Reference</i> | <b>0.04 (0.02 ; 0.06)</b> | <b>0.02</b>      |
| EFW                   | Basic    | <b>-0.18 (-0.20 ; -0.12)</b> | <b>-0.14 (-0.20 ; -0.08)</b> | -0.05 (-0.11 ; 0.01)          | <i>Reference</i> | <b>0.05 (0.03 ; 0.06)</b> | <b>&lt;0.001</b> |
|                       | Adjusted | <b>-0.16 (-0.23 ; -0.08)</b> | <b>-0.11 (-0.17 ; -0.04)</b> | -0.05 (-0.11 ; 0.02)          | <i>Reference</i> | <b>0.04 (0.02 ; 0.06)</b> | <b>&lt;0.001</b> |

Abbreviations: SGA: small for gestational age, HC: head circumference, FL: femur length, AC: abdominal circumference, EFW: estimated fetal weight. Values are regression coefficients with the 95% CI of the data in SD-score and are based on linear regression models. Basic model: by the use of SD scores it is automatically adjusted for gestational age. Fully adjusted model: basic model and additionally adjusted for maternal age, educational level, smoking, alcohol use, folic acid supplement use, ethnicity, parity, pre-pregnancy body mass index and fetal sex. p-for trend analysis with the neighbourhood deprivation as a continuous measure.

97 **Supplemental Table 7.** Observed and expected values of covariates.

| <b>Maternal characteristics</b>                   |                    |                    |
|---------------------------------------------------|--------------------|--------------------|
|                                                   | <b>Observed</b>    | <b>Expected</b>    |
| Age at intake (years)                             | 29.6 (5.3)         | 29.6 (5.3)         |
| Prepregnancy body mass index (kg/m <sup>2</sup> ) | 22.8 (18.4 – 32.2) | 22.6 (18.6 – 32.4) |
| Parity (nulliparous)                              | 4796 (55.7)        | 4739 (55.7)        |
| Fetal sex (boy)                                   | 4347 (50.4)        | 4346 (50.4)        |
| Educational level                                 |                    |                    |
| Lower/no education                                | 1101 (12.8)        | 916 (11.7)         |
| Middle                                            | 4060 (47.1)        | 3638 (46.4)        |
| High                                              | 3456 (40.1)        | 3282 (41.9)        |
| Ethnicity                                         |                    |                    |
| Dutch and Western                                 | 4967 (57.6)        | 4793 (58.8)        |
| Turkish and Moroccan                              | 1464 (17.0)        | 1330 (16.3)        |
| African                                           | 1178 (13.7)        | 1076 (13.2)        |
| Asian                                             | 1008 (11.7)        | 946 (11.6)         |
| Smoking                                           |                    |                    |
| Never smoked during pregnancy                     | 6256 (72.6)        | 5472 (72.8)        |
| Smoked until pregnancy was known                  | 735 (8.5)          | 644 (8.6)          |
| Continued smoking in pregnancy                    | 1626 (18.9)        | 1403 (18.7)        |
| Alcohol                                           |                    |                    |
| Never alcohol consumption in pregnancy            | 4351 (50.5)        | 3692 (49.8)        |
| Alcohol consumption until pregnancy was known     | 1149 (13.3)        | 999 (13.5)         |
| Continued alcohol consumption in pregnancy        | 3117 (36.2)        | 2728 (36.8)        |
| Folic acid supplement use                         |                    |                    |
| None                                              | 2751 (31.9)        | 1877 (29.4)        |
| Start in first 10 weeks of pregnancy              | 2661 (30.9)        | 1981 (31.1)        |
| Start preconceptional                             | 3205 (37.2)        | 2518 (39.5)        |

98 Data are represented as n (%), mean (SD) or median with the 90% range. Percentages ‘expected’  
 99 displayed as valid percentages.

100

1  
2  
3 101 **Supplemental 1.** Multiple imputations for missing data of covariates.  
4

5 102 We imputed missing data of the covariates using multiple imputations (17). The percentages of  
6  
7 103 missing values for the confounders within the population for analysis were lower than 20%. For the  
8  
9 104 multiple imputation, we the Markov chain Monte Carlo approach. In the imputation model, we  
10 105 included all confounders, plus maternal age, ethnicity, parity and prepregnancy BMI. Furthermore, we  
11 106 additionally added the studied determinants and outcomes in the imputation model as prediction  
12  
13 107 variables only; they were not imputed themselves. Five imputed datasets were created and analyzed  
14  
15 108 together.

---

16  
17 109  
18  
19  
20  
21  
22  
23  
24  
25  
26  
27  
28  
29  
30  
31  
32  
33  
34  
35  
36  
37  
38  
39  
40  
41  
42  
43  
44  
45  
46  
47  
48  
49  
50  
51  
52  
53  
54  
55  
56  
57  
58  
59  
60

For peer review only

1  
2  
3 **Supplemental 2.** First trimester and fetal growth, measurement guidelines.

4 111

5 112 **CRL: crown-rump length (39)**

6  
7 113 CRL is measured as the largest dimension of embryo, excluding the yolk sac and extremities. A  
8 114 midline sagittal section of the whole embryo or fetus should be obtained, ideally with the embryo or  
9 115 fetus oriented horizontally on the screen. An image should be magnified sufficiently to fill most of the  
10 116 width of the ultrasound screen, so that the measurement line between crown and rump is at about 90°  
11 117 to the ultrasound beam.

12  
13  
14 118 Caliper placement: measure the fetus in a neutral position (i.e. neither flexed nor hyperextended). The  
15 119 end points of crown and rump should be defined clearly.

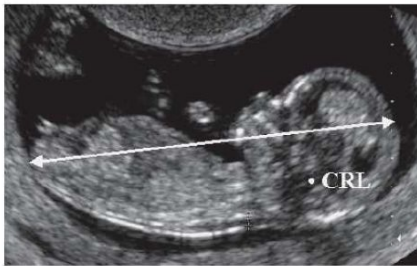

26 120

27 121

28 122

29  
30 123 **HC: Head circumference (40)**

31 124 As described for the BPD, ensuring that the circumference placement markers correspond to the  
32 125 technique described on the reference chart.

33  
34  
35 126 Caliper placement: If the ultrasound equipment has ellipse measurement capacity, then the HC can be  
36 127 measured directly by placing the ellipse around the outside of the skull bone echoes.

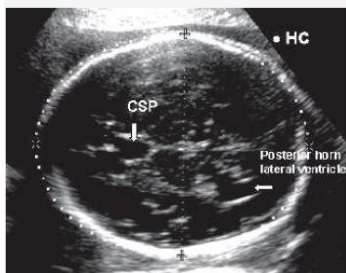

46 128

47

48

49

50

51

52

53

54

55

56

57

58

59

60

1  
2  
3 **129 AC: abdominal circumference (40)**

4 130 - Transverse section of the fetal abdomen (as circular as possible);

5 131 - umbilical vein at the level of the portal sinus;

6 132 - stomach bubble visualized;

7 133 - kidneys should not be visible.

8 134 Caliper placement: The AC is measured at the outer surface of the skin line, either directly with ellipse  
9 135 calipers or calculated from linear measurements made perpendicular to each other, usually the  
10 136 anteroposterior abdominal diameter and transverse abdominal diameter.

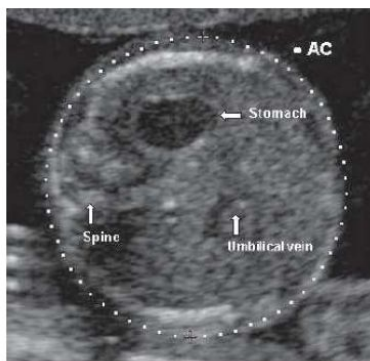

27 137

28 138

29  
30 **139 FL: femur length (40)**

31 140 The FL is imaged optimally with both ends of the ossified metaphysis clearly visible. The longest  
32 141 axis of the ossified diaphysis is measured. The same technique as that used to establish the reference  
33 142 chart should be used with regard to the angle between the femur and the insonating ultrasound beams.  
34 143 An angle of insonation between 45° and 90° is typical.

35 144 Caliper placement: Each caliper is placed at the ends of the ossified diaphysis without including the  
36 145 distal femoral epiphysis if it is visible

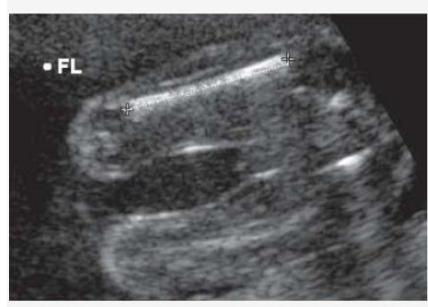

50 146

51 147

# Reporting checklist for cohort study.

Based on the STROBE cohort guidelines.

## Instructions to authors

Complete this checklist by entering the page numbers from your manuscript where readers will find each of the items listed below.

Your article may not currently address all the items on the checklist. Please modify your text to include the missing information. If you are certain that an item does not apply, please write "n/a" and provide a short explanation.

Upload your completed checklist as an extra file when you submit to a journal.

In your methods section, say that you used the STROBE cohort reporting guidelines, and cite them as:

von Elm E, Altman DG, Egger M, Pocock SJ, Gøtzsche PC, Vandenbroucke JP. The Strengthening of Reporting of Observational Studies in Epidemiology (STROBE) Statement: guidelines for reporting observational studies.

|                           |                                                                                                        | Page   |
|---------------------------|--------------------------------------------------------------------------------------------------------|--------|
|                           | Reporting Item                                                                                         | Number |
| <b>Title and abstract</b> |                                                                                                        |        |
| Title                     | <a href="#">#1a</a> Indicate the study's design with a commonly used term in the title or the abstract | 1      |



|    |                      |                     |                                                                 |         |
|----|----------------------|---------------------|-----------------------------------------------------------------|---------|
| 1  | Abstract             | <a href="#">#1b</a> | Provide in the abstract an informative and balanced summary     | 2       |
| 2  |                      |                     |                                                                 |         |
| 3  |                      |                     |                                                                 |         |
| 4  |                      |                     | of what was done and what was found                             |         |
| 5  |                      |                     |                                                                 |         |
| 6  | <b>Introduction</b>  |                     |                                                                 |         |
| 7  |                      |                     |                                                                 |         |
| 8  |                      |                     |                                                                 |         |
| 9  |                      |                     |                                                                 |         |
| 10 | Background /         | <a href="#">#2</a>  | Explain the scientific background and rationale for the         | 4       |
| 11 | rationale            |                     | investigation being reported                                    |         |
| 12 |                      |                     |                                                                 |         |
| 13 |                      |                     |                                                                 |         |
| 14 |                      |                     |                                                                 |         |
| 15 | Objectives           | <a href="#">#3</a>  | State specific objectives, including any prespecified           | 4       |
| 16 |                      |                     | hypotheses                                                      |         |
| 17 |                      |                     |                                                                 |         |
| 18 |                      |                     |                                                                 |         |
| 19 |                      |                     |                                                                 |         |
| 20 | <b>Methods</b>       |                     |                                                                 |         |
| 21 |                      |                     |                                                                 |         |
| 22 |                      |                     |                                                                 |         |
| 23 | Study design         | <a href="#">#4</a>  | Present key elements of study design early in the paper         | 4, 5    |
| 24 |                      |                     |                                                                 |         |
| 25 |                      |                     |                                                                 |         |
| 26 | Setting              | <a href="#">#5</a>  | Describe the setting, locations, and relevant dates, including  | 4, 5    |
| 27 |                      |                     | periods of recruitment, exposure, follow-up, and data           |         |
| 28 |                      |                     | collection                                                      |         |
| 29 |                      |                     |                                                                 |         |
| 30 |                      |                     |                                                                 |         |
| 31 |                      |                     |                                                                 |         |
| 32 |                      |                     |                                                                 |         |
| 33 |                      |                     |                                                                 |         |
| 34 | Eligibility criteria | <a href="#">#6a</a> | Give the eligibility criteria, and the sources and methods of   | 4, 5    |
| 35 |                      |                     | selection of participants. Describe methods of follow-up.       |         |
| 36 |                      |                     |                                                                 |         |
| 37 |                      |                     |                                                                 |         |
| 38 |                      |                     |                                                                 |         |
| 39 | Eligibility criteria | <a href="#">#6b</a> | For matched studies, give matching criteria and number of       | 4, 5    |
| 40 |                      |                     | exposed and unexposed                                           |         |
| 41 |                      |                     |                                                                 |         |
| 42 |                      |                     |                                                                 |         |
| 43 |                      |                     |                                                                 |         |
| 44 |                      |                     |                                                                 |         |
| 45 | Variables            | <a href="#">#7</a>  | Clearly define all outcomes, exposures, predictors, potential   | 5, 6    |
| 46 |                      |                     | confounders, and effect modifiers. Give diagnostic criteria, if |         |
| 47 |                      |                     | applicable                                                      |         |
| 48 |                      |                     |                                                                 |         |
| 49 |                      |                     |                                                                 |         |
| 50 |                      |                     |                                                                 |         |
| 51 |                      |                     |                                                                 |         |
| 52 |                      |                     |                                                                 |         |
| 53 | Data sources /       | <a href="#">#8</a>  | For each variable of interest give sources of data and details  | 4, 5, 6 |
| 54 | measurement          |                     | of methods of assessment (measurement). Describe                |         |
| 55 |                      |                     | comparability of assessment methods if there is more than       |         |
| 56 |                      |                     |                                                                 |         |
| 57 |                      |                     |                                                                 |         |
| 58 |                      |                     |                                                                 |         |
| 59 |                      |                     |                                                                 |         |
| 60 |                      |                     |                                                                 |         |

one group. Give information separately for for exposed and unexposed groups if applicable.

|    |                |                      |                                                                   |
|----|----------------|----------------------|-------------------------------------------------------------------|
| 1  |                |                      |                                                                   |
| 2  |                |                      |                                                                   |
| 3  |                |                      |                                                                   |
| 4  |                |                      |                                                                   |
| 5  |                |                      |                                                                   |
| 6  | Bias           | <a href="#">#9</a>   | Describe any efforts to address potential sources of bias 5, 6, 8 |
| 7  |                |                      |                                                                   |
| 8  |                |                      |                                                                   |
| 9  | Study size     | <a href="#">#10</a>  | Explain how the study size was arrived at 4, 5                    |
| 10 |                |                      |                                                                   |
| 11 |                |                      |                                                                   |
| 12 | Quantitative   | <a href="#">#11</a>  | Explain how quantitative variables were handled in the 7, 8       |
| 13 |                |                      |                                                                   |
| 14 | variables      |                      | analyses. If applicable, describe which groupings were            |
| 15 |                |                      | chosen, and why                                                   |
| 16 |                |                      |                                                                   |
| 17 |                |                      |                                                                   |
| 18 |                |                      |                                                                   |
| 19 | Statistical    | <a href="#">#12a</a> | Describe all statistical methods, including those used to         |
| 20 |                |                      | control for confounding                                           |
| 21 | methods        |                      |                                                                   |
| 22 |                |                      |                                                                   |
| 23 |                |                      |                                                                   |
| 24 |                |                      |                                                                   |
| 25 | 6, 8           |                      |                                                                   |
| 26 |                |                      |                                                                   |
| 27 |                |                      |                                                                   |
| 28 | Statistical    | <a href="#">#12b</a> | Describe any methods used to examine subgroups and 7, 8           |
| 29 |                |                      |                                                                   |
| 30 | methods        |                      | interactions                                                      |
| 31 |                |                      |                                                                   |
| 32 |                |                      |                                                                   |
| 33 | Statistical    | <a href="#">#12c</a> | Explain how missing data were addressed 7, 8                      |
| 34 |                |                      |                                                                   |
| 35 | methods        |                      |                                                                   |
| 36 |                |                      |                                                                   |
| 37 |                |                      |                                                                   |
| 38 |                |                      |                                                                   |
| 39 | Statistical    | <a href="#">#12d</a> | If applicable, explain how loss to follow-up was addressed 7, 8   |
| 40 |                |                      |                                                                   |
| 41 | methods        |                      |                                                                   |
| 42 |                |                      |                                                                   |
| 43 |                |                      |                                                                   |
| 44 | Statistical    | <a href="#">#12e</a> | Describe any sensitivity analyses                                 |
| 45 |                |                      |                                                                   |
| 46 | methods        |                      |                                                                   |
| 47 |                |                      |                                                                   |
| 48 |                |                      |                                                                   |
| 49 | 7, 8           |                      |                                                                   |
| 50 |                |                      |                                                                   |
| 51 |                |                      |                                                                   |
| 52 |                |                      |                                                                   |
| 53 | <b>Results</b> |                      |                                                                   |
| 54 |                |                      |                                                                   |
| 55 |                |                      |                                                                   |
| 56 | Participants   | <a href="#">#13a</a> | Report numbers of individuals at each stage of study—eg 9         |
| 57 |                |                      |                                                                   |
| 58 |                |                      | numbers potentially eligible, examined for eligibility,           |
| 59 |                |                      |                                                                   |
| 60 |                |                      |                                                                   |

confirmed eligible, included in the study, completing follow-up, and analysed. Give information separately for for exposed and unexposed groups if applicable.

|    |                  |                      |                                                                                                                                                                                                                   |       |
|----|------------------|----------------------|-------------------------------------------------------------------------------------------------------------------------------------------------------------------------------------------------------------------|-------|
| 1  |                  |                      |                                                                                                                                                                                                                   |       |
| 2  |                  |                      |                                                                                                                                                                                                                   |       |
| 3  |                  |                      |                                                                                                                                                                                                                   |       |
| 4  |                  |                      |                                                                                                                                                                                                                   |       |
| 5  |                  |                      |                                                                                                                                                                                                                   |       |
| 6  |                  |                      |                                                                                                                                                                                                                   |       |
| 7  |                  |                      |                                                                                                                                                                                                                   |       |
| 8  | Participants     | <a href="#">#13b</a> | Give reasons for non-participation at each stage                                                                                                                                                                  | 9     |
| 9  |                  |                      |                                                                                                                                                                                                                   |       |
| 10 |                  |                      |                                                                                                                                                                                                                   |       |
| 11 | Participants     | <a href="#">#13c</a> | Consider use of a flow diagram                                                                                                                                                                                    |       |
| 12 |                  |                      |                                                                                                                                                                                                                   |       |
| 13 |                  |                      |                                                                                                                                                                                                                   |       |
| 14 | 9                |                      |                                                                                                                                                                                                                   |       |
| 15 |                  |                      |                                                                                                                                                                                                                   |       |
| 16 |                  |                      |                                                                                                                                                                                                                   |       |
| 17 | Descriptive data | <a href="#">#14a</a> | Give characteristics of study participants (eg demographic, clinical, social) and information on exposures and potential confounders. Give information separately for exposed and unexposed groups if applicable. | 9     |
| 18 |                  |                      |                                                                                                                                                                                                                   |       |
| 19 |                  |                      |                                                                                                                                                                                                                   |       |
| 20 |                  |                      |                                                                                                                                                                                                                   |       |
| 21 |                  |                      |                                                                                                                                                                                                                   |       |
| 22 |                  |                      |                                                                                                                                                                                                                   |       |
| 23 |                  |                      |                                                                                                                                                                                                                   |       |
| 24 |                  |                      |                                                                                                                                                                                                                   |       |
| 25 |                  |                      |                                                                                                                                                                                                                   |       |
| 26 |                  |                      |                                                                                                                                                                                                                   |       |
| 27 | Descriptive data | <a href="#">#14b</a> | Indicate number of participants with missing data for each variable of interest                                                                                                                                   |       |
| 28 |                  |                      |                                                                                                                                                                                                                   |       |
| 29 |                  |                      |                                                                                                                                                                                                                   |       |
| 30 |                  |                      |                                                                                                                                                                                                                   |       |
| 31 |                  |                      |                                                                                                                                                                                                                   |       |
| 32 | 9                |                      |                                                                                                                                                                                                                   |       |
| 33 |                  |                      |                                                                                                                                                                                                                   |       |
| 34 |                  |                      |                                                                                                                                                                                                                   |       |
| 35 |                  |                      |                                                                                                                                                                                                                   |       |
| 36 | Descriptive data | <a href="#">#14c</a> | Summarise follow-up time (eg, average and total amount)                                                                                                                                                           |       |
| 37 |                  |                      |                                                                                                                                                                                                                   |       |
| 38 |                  |                      |                                                                                                                                                                                                                   |       |
| 39 | 9                |                      |                                                                                                                                                                                                                   |       |
| 40 |                  |                      |                                                                                                                                                                                                                   |       |
| 41 |                  |                      |                                                                                                                                                                                                                   |       |
| 42 | Outcome data     | <a href="#">#15</a>  | Report numbers of outcome events or summary measures over time. Give information separately for exposed and unexposed groups if applicable.                                                                       |       |
| 43 |                  |                      |                                                                                                                                                                                                                   |       |
| 44 |                  |                      |                                                                                                                                                                                                                   |       |
| 45 |                  |                      |                                                                                                                                                                                                                   |       |
| 46 |                  |                      |                                                                                                                                                                                                                   |       |
| 47 |                  |                      |                                                                                                                                                                                                                   |       |
| 48 |                  |                      |                                                                                                                                                                                                                   |       |
| 49 | 9, 10            |                      |                                                                                                                                                                                                                   |       |
| 50 |                  |                      |                                                                                                                                                                                                                   |       |
| 51 |                  |                      |                                                                                                                                                                                                                   |       |
| 52 | Main results     | <a href="#">#16a</a> | Give unadjusted estimates and, if applicable, confounder-adjusted estimates and their precision (eg, 95% confidence                                                                                               | 9, 10 |
| 53 |                  |                      |                                                                                                                                                                                                                   |       |
| 54 |                  |                      |                                                                                                                                                                                                                   |       |
| 55 |                  |                      |                                                                                                                                                                                                                   |       |
| 56 |                  |                      |                                                                                                                                                                                                                   |       |
| 57 |                  |                      |                                                                                                                                                                                                                   |       |
| 58 |                  |                      |                                                                                                                                                                                                                   |       |
| 59 |                  |                      |                                                                                                                                                                                                                   |       |
| 60 |                  |                      |                                                                                                                                                                                                                   |       |

interval). Make clear which confounders were adjusted for  
and why they were included

1  
2  
3  
4  
5  
6 Main results [#16b](#) Report category boundaries when continuous variables were 9, 10  
7  
8 categorized  
9

10  
11 Main results [#16c](#) If relevant, consider translating estimates of relative risk into  
12 absolute risk for a meaningful time period  
13  
14

15  
16 9, 10  
17  
18

19 Other analyses [#17](#) Report other analyses done—eg analyses of subgroups and 10, 11  
20 interactions, and sensitivity analyses  
21  
22  
23

## 24 Discussion

25  
26  
27  
28 Key results [#18](#) Summarise key results with reference to study objectives 11  
29

30  
31 Limitations [#19](#) Discuss limitations of the study, taking into account sources 12, 13  
32 of potential bias or imprecision. Discuss both direction and  
33 magnitude of any potential bias.  
34  
35  
36  
37

38  
39 Interpretation [#20](#) Give a cautious overall interpretation considering objectives, 13, 14  
40 limitations, multiplicity of analyses, results from similar  
41 studies, and other relevant evidence.  
42  
43  
44

45  
46 Generalisability [#21](#) Discuss the generalisability (external validity) of the study 13  
47 results  
48  
49

## 50 Other Information

51  
52  
53  
54  
55  
56  
57  
58  
59  
60

1 Funding [#22](#) Give the source of funding and the role of the funders for the 15  
2  
3 present study and, if applicable, for the original study on  
4  
5 which the present article is based  
6  
7

8  
9 The STROBE checklist is distributed under the terms of the Creative Commons Attribution License  
10  
11 CC-BY. This checklist was completed on 14. January 2021 using <https://www.goodreports.org/>, a tool  
12  
13 made by the [EQUATOR Network](#) in collaboration with [Penelope.ai](#)  
14  
15

16  
17  
18  
19  
20  
21  
22  
23  
24  
25  
26  
27  
28  
29  
30  
31  
32  
33  
34  
35  
36  
37  
38  
39  
40  
41  
42  
43  
44  
45  
46  
47  
48  
49  
50  
51  
52  
53  
54  
55  
56  
57  
58  
59  
60

For peer review only

# BMJ Open

## The association between neighbourhood deprivation, fetal growth, small-for-gestational age and preterm birth: a population-based prospective cohort study.

|                                 |                                                                                                                                                                                                                                                                                                                                                                                                                                                                                                                                                                                       |
|---------------------------------|---------------------------------------------------------------------------------------------------------------------------------------------------------------------------------------------------------------------------------------------------------------------------------------------------------------------------------------------------------------------------------------------------------------------------------------------------------------------------------------------------------------------------------------------------------------------------------------|
| Journal:                        | <i>BMJ Open</i>                                                                                                                                                                                                                                                                                                                                                                                                                                                                                                                                                                       |
| Manuscript ID                   | bmjopen-2021-049075.R1                                                                                                                                                                                                                                                                                                                                                                                                                                                                                                                                                                |
| Article Type:                   | Original research                                                                                                                                                                                                                                                                                                                                                                                                                                                                                                                                                                     |
| Date Submitted by the Author:   | 25-Sep-2021                                                                                                                                                                                                                                                                                                                                                                                                                                                                                                                                                                           |
| Complete List of Authors:       | Gootjes, Dionne; Erasmus MC, Department of Obstetrics and Gynaecology, Division of Obstetrics and Prenatal Medicine; Erasmus MC, Generation R Study Group<br>Posthumus, Anke G; Erasmus MC, Department of Obstetrics and Gynaecology, Division of Obstetrics and Prenatal Medicine; Erasmus MC, Generation R Study Group<br>Jaddoe, Vincent; Erasmus MC, Department of Paediatrics; Erasmus MC, Generation R Study Group<br>Stegers, E.A.P.; Erasmus MC, Department of Obstetrics and Gynaecology, Division of Obstetrics and Prenatal Medicine; Erasmus MC, Generation R Study Group |
| <b>Primary Subject Heading</b>: | Obstetrics and gynaecology                                                                                                                                                                                                                                                                                                                                                                                                                                                                                                                                                            |
| Secondary Subject Heading:      | Epidemiology, Obstetrics and gynaecology, Public health                                                                                                                                                                                                                                                                                                                                                                                                                                                                                                                               |
| Keywords:                       | SOCIAL MEDICINE, PUBLIC HEALTH, PREVENTIVE MEDICINE, Ultrasonography < OBSTETRICS, Prenatal diagnosis < OBSTETRICS, Risk management < HEALTH SERVICES ADMINISTRATION & MANAGEMENT                                                                                                                                                                                                                                                                                                                                                                                                     |
|                                 |                                                                                                                                                                                                                                                                                                                                                                                                                                                                                                                                                                                       |

SCHOLARONE™  
Manuscripts



I, the Submitting Author has the right to grant and does grant on behalf of all authors of the Work (as defined in the below author licence), an exclusive licence and/or a non-exclusive licence for contributions from authors who are: i) UK Crown employees; ii) where BMJ has agreed a CC-BY licence shall apply, and/or iii) in accordance with the terms applicable for US Federal Government officers or employees acting as part of their official duties; on a worldwide, perpetual, irrevocable, royalty-free basis to BMJ Publishing Group Ltd ("BMJ") its licensees and where the relevant Journal is co-owned by BMJ to the co-owners of the Journal, to publish the Work in this journal and any other BMJ products and to exploit all rights, as set out in our [licence](#).

The Submitting Author accepts and understands that any supply made under these terms is made by BMJ to the Submitting Author unless you are acting as an employee on behalf of your employer or a postgraduate student of an affiliated institution which is paying any applicable article publishing charge ("APC") for Open Access articles. Where the Submitting Author wishes to make the Work available on an Open Access basis (and intends to pay the relevant APC), the terms of reuse of such Open Access shall be governed by a Creative Commons licence – details of these licences and which [Creative Commons](#) licence will apply to this Work are set out in our licence referred to above.

Other than as permitted in any relevant BMJ Author's Self Archiving Policies, I confirm this Work has not been accepted for publication elsewhere, is not being considered for publication elsewhere and does not duplicate material already published. I confirm all authors consent to publication of this Work and authorise the granting of this licence.

1  
2  
3 1 **The association between neighbourhood deprivation, fetal growth, small-for-**  
4 **gestational age and preterm birth: a population-based prospective cohort**  
5 2 **study.**  
6  
7 3  
8

9 4 D.V. Gootjes<sup>1,3</sup>, A.G. Posthumus<sup>1,3</sup>, V.W.V Jaddoe<sup>2,3</sup>, E.A.P. Steegers<sup>1,3</sup>

10  
11 5 <sup>1</sup>Department of Obstetrics and Gynaecology, Division of Obstetrics and Prenatal Medicine,

12  
13 6 <sup>2</sup>Department of Paediatrics, <sup>3</sup>Generation R Study Group, all: Erasmus University Medical Centre,  
14 7 Rotterdam, The Netherlands.  
15 8

16 9  
17  
18  
19 10 **The authors declare no conflict of interest.**  
20  
21 11

22  
23 12 **Corresponding author**

24 13 Correspondence to Dionne V. Gootjes

25 14 Wyttemaweg 80, 3015 CN Rotterdam

26 15 [d.gootjes@erasmusmc.nl](mailto:d.gootjes@erasmusmc.nl)

27 16 Telephone: +3110 703 04 52 | +316 307 252 47  
28  
29 17  
30 18  
31 19

32  
33  
34 19 **Key words:** fetal, neighborhood/place, deprivation, pregnancy, socio-economic  
35  
36

37 20 **Word count:** 4362  
38  
39  
40  
41  
42  
43  
44  
45  
46  
47  
48  
49  
50  
51  
52  
53  
54  
55  
56  
57  
58  
59  
60



1  
2  
3 21 **Abstract**  
4

5 22 **Objectives:** To study the associations between neighbourhood deprivation and fetal growth, including  
6  
7 23 growth in the first trimester, and adverse pregnancy outcomes.  
8  
9

10 24 **Design:** Prospective cohort study.  
11  
12

13 25 **Setting:** The Netherlands, Rotterdam.  
14  
15

16 26 **Participants:** 8617 live singleton births from the Generation R cohort study.  
17  
18

19 27 **Exposition:** Living in a deprived neighbourhood.  
20  
21

22 28 **Main outcome measures:** Fetal growth trajectories of head circumference, weight and length.  
23  
24

25 29 **Secondary outcomes measures:** Small-for-gestational age (SGA) and preterm birth (PTB)).  
26  
27

28 30 **Results:** Neighbourhood deprivation was not associated with first trimester growth. However, a higher  
29  
30 31 neighbourhood status score (less deprivation), was associated with increased fetal growth in the  
31  
32 32 second and third trimester (e.g. estimated fetal weight (adjusted regression coefficient 0.04 (95% CI  
33  
34 33 0.02 ; 0.06). Less deprivation was also associated with a decreased odd of SGA (aOR 0.91 (95% CI  
35  
36 34 0.86 ; 0.97, p-value 0.01)) and PTB (aOR 0.89 (95% CI 0.82 ; 0.96, p-value 0.01)).  
37  
38

39 35 **Conclusions:** We found an association between neighbourhood deprivation and fetal growth in the  
40  
41 36 second and third trimester pregnancy, but not with first trimester growth. Less neighbourhood  
42  
43 37 deprivation is associated with lower odds of adverse pregnancy outcomes. The associations remained  
44  
45 38 after adjustment for individual level risk factors. This supports the hypothesis that living in a deprived  
46  
47 39 neighbourhood acts as an independent risk factor for fetal growth and adverse pregnancy outcomes,  
48  
49 40 above and beyond individual risk factors.  
50  
51  
52  
53  
54  
55  
56  
57  
58  
59  
60

1  
2  
3 41 **Article Summary**  
4  
5

6 42 **Strengths and limitations of this study**  
7  
8

- 9 43 • This study is performed within in a large, multi-ethnic cohort.  
10  
11  
12 44 • The Generation R study population is not completely representative of the Dutch population.  
13  
14  
15 45 • Associations were adjusted for a wide range of relevant individual level risk factors, which  
16  
17 46 allows the isolation of a neighbourhood specific effect best as possible.  
18  
19  
20  
21  
22  
23  
24  
25  
26  
27  
28  
29  
30  
31  
32  
33  
34  
35  
36  
37  
38  
39  
40  
41  
42  
43  
44  
45  
46  
47  
48  
49  
50  
51  
52  
53  
54  
55  
56  
57  
58  
59  
60

For peer review only

## 47 Introduction

48 A low individual socioeconomic status (SES) is associated with adverse health outcomes.(1)  
49 Additionally, there is accumulating evidence that the socioeconomic status of the neighbourhood in  
50 which a person lives is also associated with health outcomes.(2) This is also the case for pregnancy:  
51 both individual SES and living in a deprived neighbourhood are acknowledged risk factors for adverse  
52 pregnancy outcomes.(3-5)

53 Recent evidence shows that other factors, such as maternal nutrition and lifestyle, already  
54 affect pregnancy from the first trimester of pregnancy onwards.(6-9) Gaining a better understanding of  
55 modifiable factors that influence pregnancy from the earliest phase onwards is important. First, since  
56 impaired development during the first trimester of pregnancy is associated with adverse pregnancy  
57 outcomes.(6) Second, in line with the DOHaD-paradigm (Developmental Origin of Health and  
58 Disease), impaired development in pregnancy and adverse pregnancy outcomes are associated with an  
59 increased risk of non-communicable diseases in adult life like cardiovascular disease.(10) If impaired  
60 early fetal development could be prevented or recognized, this would enable the prevention of both  
61 short-term and long-term adverse outcomes.

62 Living in a deprived neighbourhood is known to be a risk factor for adverse health outcomes,  
63 above and beyond the association with individual risk factors such as inadequate nutrition and lifestyle  
64 behaviors. Living in a deprived neighbourhood may lead to exposure to a suboptimal environment,  
65 with higher rates of air pollution, less access to facilities such as a green environment to walk in, less  
66 health care facilities close, and little possibility to purchase healthy food nearby. Lastly, living in a  
67 deprived neighbourhood is acknowledged as a source of chronic stress, which is associated with  
68 increased cortisol levels, and thereby acts as an independent risk factor for adverse health  
69 outcomes.(11, 12) It is however unknown whether living in a deprived neighbourhood is also  
70 associated with adverse pregnancy outcomes and (early) fetal development. Therefore, the aim of this  
71 study was to investigate the associations between neighbourhood deprivation, fetal growth including  
72 growth in the first trimester, and adverse pregnancy outcomes.

## 73 **Methods**

### 74 **Design**

75 This study was embedded in the Generation R (Rotterdam) Study, a population-based  
76 prospective cohort study.<sup>(13)</sup> Pregnant women living in the area of Rotterdam, the Netherlands, with  
77 an expected delivery date between April 2002 and January 2006, were invited to participate in this  
78 study. The 9778 mothers enrolled in the study gave birth to 9749 live born children. Of these mothers,  
79 91% (n=8879) were prenatally enrolled in the study, giving birth to 8976 children. Our aim was to  
80 investigate growth trajectories and outcomes of ongoing singleton pregnancies. We excluded the  
81 following pregnancies: twin pregnancies, terminated pregnancies, intra-uterine deaths and pregnancies  
82 without information on area of residence or ultrasound data (**Figure 1**). The study protocol was  
83 approved by the Medical Ethical Committee of Erasmus Medical Centre, Rotterdam (MEC 198.782/  
84 2001/31). Written informed consent was obtained from all participants.

### 85 **Patient and public involvement statement**

86 This research was done without patient involvement. Patients were not invited to comment on  
87 the study design and were not consulted to develop patient relevant outcomes or interpret the results.  
88 Patients were not invited to contribute to the writing or editing of this document for readability or  
89 accuracy.

## 90 **Materials**

### 91 **Neighbourhood deprivation**

92 We used area-based status scores as a proxy for neighbourhood deprivation, which were made  
93 available by the Netherlands Institute for Social Research.<sup>(14)</sup> The scores are matched on four-digit  
94 postcodes and are based on mean household income, proportion of population with low income,  
95 proportion of population with low educational level, and proportion of population without paid work.  
96 The scores are determined every 4 years, and a more negative score represents a lower socioeconomic  
97 status. The status scores used in this study were calculated in 2002 and 2006. The correlations between  
98 the status scores in 2002 and 2006 were very high:  $r = 0.97$ . To assign the status scores in the best  
99 possible way, pregnancies in 2002 and 2003 were allocated with the status score of 2002. For

1  
2  
3 100 pregnancies in 2005 and 2006, the status score of 2006 was assigned. For pregnancies in 2004, the  
4  
5 101 average score of 2002 and 2006 was assigned.  
6  
7

### 8 102 **Pregnancy dating**

9 103 Gestational age is the most important determinant of fetal growth, so precise dating of the  
10  
11 104 pregnancy is important. It has long been assumed that embryonic growth in the first trimester of  
12  
13 105 pregnancy is universal. This is the rationale behind the current practice of pregnancy dating using the  
14  
15 106 crown-rump length (CRL), if the gestational age is less than 12 weeks and 5 days and the CRL  
16  
17 107 measurement is smaller than 65 mm.(15) However, study findings suggest that first trimester growth is  
18  
19 108 not uniform.(16) Therefore, in our analyses with CRL measurements as the outcome of interest,  
20  
21 109 pregnancy dating was not based on the CRL, but on the known and reliable last menstrual period  
22  
23 110 (LMP) in case of a regular menstrual cycle ( $28 \pm 4$  days).(6) All other cases were excluded for that  
24  
25 111 particular analyses of CRL. The LMP was obtained from the referral letter and confirmed at  
26  
27 112 enrolment. Additional information on regularity and cycle duration was obtained through  
28  
29 113 questionnaires. When the gestational age was more than 12 weeks and 5 days, or the biparietal  
30  
31 114 diameter (BPD) was larger than 23 mm, pregnancy dating was performed using the BPD.  
32  
33  
34

### 35 115 **Growth parameters and adverse pregnancy outcomes**

36 116 The aim of the study was to focus on fetal outcomes, in terms of growth and development. The  
37  
38 117 selected outcomes were carefully chosen from the 'Big 4 conditions', which are specifically defined  
39  
40 118 conditions that precede perinatal mortality in 85 % of all cases, namely: small for gestational age  
41  
42 119 (birth weight < 10th percentile for gestational age), preterm birth (birth < 37 weeks of gestation),  
43  
44 120 congenital disorders, and/or low Apgar score (<7 after 5 min).(17, 18) Due to the low numbers of  
45  
46 121 cases with congenital disorders within the Generation R population, and susceptibility for Apgar score  
47  
48 122 to be affected by the course of delivery which may confound the effect of neighbourhood deprivation  
49  
50 123 during pregnancy, we selected the other 2 major morbidity factors as outcome for this study.  
51  
52

53 124 Ultrasound assessments were carried out during visits to one of the research centres, and took  
54  
55 125 place in early- (median 13.2 weeks of gestation), mid- (median 20.5 weeks of gestation) and late  
56  
57 126 (median 30.3 weeks of gestation) pregnancy. Growth parameters included the CRL, head  
58  
59 127 circumference (HC), femur length (FL), abdominal circumference (AC), estimated fetal weight (EFW)  
60

1  
2  
3 128 and birthweight. EFW was calculated using the Hadlock formula with parameters AC, HC and FL (in  
4  
5 129 cm):  $EFW = 10^{(1.326 - 0.00326*AC*FL + 0.0107*HC + 0.0438*AC + 0.158*FL)}$  (**Supplemental**  
6  
7 130 **1. First trimester and fetal growth, measurement guidelines**).(19) Gestational age adjusted  
8  
9 131 standard deviation scores (SDS) were constructed for all growth measurements.(20) The SDS for  
10  
11 132 birthweight were constructed using growth standards from Niklasson et al., which were adjusted for  
12  
13 133 gestational age at the time of birth and sex of the neonate.(21) Measurements were performed using  
14  
15 134 uniform ultrasound procedures and were executed with the Aloka® model SSD-1700 (Tokyo, Japan)  
16  
17 135 or the ATL-Philips Model HDI 5000 (Seattle, WA, USA). Reproducibility of these measurements was  
18  
19 136 assessed and described previously.(22, 23)

20  
21  
22 137 Small size for gestational age (SGA) at birth was defined as a sex and gestational age adjusted  
23  
24 138 birth weight below the 10<sup>th</sup> percentile (<-1.40 SDS) in the study cohort. Preterm birth (PTB) was  
25  
26 139 defined as a gestational age of <37 weeks at delivery.

## 29 140 **Covariates**

30 141 Information on maternal age, education level, ethnicity, and maternal folic acid supplement  
31  
32 142 use was obtained at enrolment.(13) All study materials such as questionnaires, newsletters, website,  
33  
34 143 and information folders are available in three languages (Dutch, English, and Turkish). Furthermore,  
35  
36 144 staff from different ethnic backgrounds was available and verbally translated these materials into  
37  
38 145 Arabic, French and Portuguese. As such, the study staff was able to communicate with all participants.

39  
40  
41 146 Ethnicity of participating mothers was defined according to the classification of Statistics  
42  
43 147 Netherlands, and was categorized into Dutch and other Western (European, American, and Oceanian);  
44  
45 148 Turkish and Moroccan; African (Cape Verdean, other African, Surinamese-Creole, and Dutch  
46  
47 149 Antillean); and Asian (Indonesian, other Asian, and Surinamese-Hindu) according to the largest ethnic  
48  
49 150 groups in our study population and similarities in skin colour and cultural background. In sensitivity  
50  
51 151 analyses, the following classification was used: Dutch, European, Turkish, Moroccan, African, Dutch  
52  
53 152 Antillean, Cape Verdean, Indonesian, Surinamese-Creole, Surinamese-Hindu, Surinamese-  
54  
55 153 unspecified, American Western, American non Western, Asia Western, Asia non Western and  
56  
57 154 Oceanian.(13) Information about smoking, alcohol consumption, and caffeine intake was assessed by  
58  
59  
60

1  
2  
3 155 questionnaires in each trimester. Maternal pre-pregnancy body mass index was calculated from the  
4  
5 156 reported height (cm) and weight (kg) in the questionnaires. Information about pregnancy  
6  
7 157 complications, mode of delivery and childhood sex, gestational age, and weight and length at birth was  
8  
9 158 obtained from medical records.(20, 21) Complications in a previous pregnancy were defined as:  
10  
11 159 gestational diabetes, pre-eclampsia, thrombosis in arm or leg, pulmonary embolism, solutio placentae,  
12  
13 160 premature rupture of membranes, contractions before 37 weeks of pregnancy or pregnancy induced  
14  
15 161 hypertension. We selected potential confounding variables based on their associations with the  
16  
17 162 outcomes of interest, in order to isolate a neighbourhood specific effect.  
18  
19  
20

### 21 163 **Statistical analysis**

22 164 First, we examined differences between quartiles of neighbourhood deprivation for maternal  
23  
24 165 characteristics, first trimester growth and fetal growth and adverse pregnancy outcomes. Second, we  
25  
26 166 examined the associations of neighbourhood deprivation with fetal growth patterns using unbalanced  
27  
28 167 repeated measurement regression models.(24) We included neighbourhood deprivation in these  
29  
30 168 models as intercept and as interaction term with gestational age to estimate fetal growth rates over  
31  
32 169 time.(24) Third, we assessed the associations of neighbourhood deprivation with the risks of adverse  
33  
34 170 pregnancy outcomes using multiple logistic regression models. In the basic model, the crude  
35  
36 171 association between neighbourhood deprivation and the outcomes of interest were investigated. The  
37  
38 172 adjusted model was adjusted for maternal age, maternal educational level, smoking, alcohol use, folic  
39  
40 173 acid supplement use, ethnicity, parity, pre-pregnancy BMI and fetal sex. We tested interaction between  
41  
42 174 neighbourhood deprivation and complications in previous pregnancy in the regression models. Fourth,  
43  
44 175 we examined the associations of neighbourhood deprivation with fetal growth in gestational-age-  
45  
46 176 adjusted SDS in each pregnancy period using linear regression models with the same adjustment  
47  
48 177 models. We performed several sensitivity analyses: in the first, we performed multilevel regression  
49  
50 178 analysis in order to adjust for potential clustering between the different neighbourhoods. In the second,  
51  
52 179 we repeated the analyses with all 1614 available CRL measurements, compared to the analyses with  
53  
54 180 only CRL measurements below the 12 weeks of gestational age (GA).(6, 22) A third sensitivity  
55  
56 181 analysis was performed to determine to which extent the inclusion of pregnancies with an impaired  
57  
58 182 fetal development due to placental dysfunction influenced our results. Therefore we performed  
59  
60

1  
2  
3 183 analyses excluding SGA born babies. Fourth, analyses were additionally adjusted for the household  
4  
5 184 income. Also, we repeated the analyses with the different classification of ethnicity, described in the  
6  
7 185 ‘Covariates’ section. Lastly, we checked whether the presence of maternal hypertensive disorders  
8  
9 186 affected the analyses on SGA.

11 187 Our main outcome was the fetal growth, in terms of head circumference, length and weight.  
12  
13 188 Post-hoc power for 0.1 SD difference in fetal growth with an alpha of 0.05 for a study group of 8000  
14  
15 189 (this study population 8617) participants is 99.4%. We used multiple imputation for missing values of  
16  
17 190 covariates according to Markov Chain Monte Carlo method (details given in **Supplemental 2**).<sup>(25)</sup>  
18  
19 191 The percentage of missing data was <10%, except for smoking (12.7%), alcohol use (13.8%) and folic  
20  
21 192 acid supplement use (25.9%). Five imputed datasets were created and pooled for analyses. A  
22  
23 193 sensitivity analysis was performed to observe differences in observed and expected values of  
24  
25 194 confounders before and after imputation. Tests for trend were based on regression models with  
26  
27 195 neighbourhood deprivation as a continuous variable. We checked whether the regression models were  
28  
29 196 linear using scatterplots of the dependent variable plotted against the independent variable.<sup>(26)</sup>  
30  
31 197 Residuals were normally distributed as assessed by visual inspection of a normal probability plot. We  
32  
33 198 tested for multicollinearity using the tolerance statistic. As tolerance was >0.20 for all variables in our  
34  
35 199 models, there were no problems of multicollinearity. The repeated measurement analysis was  
36  
37 200 performed using the Statistical Analysis System version 9.3 (SAS, Institute Inc., Cary, NC, USA),  
38  
39 201 including the Proc Mixed module for unbalanced repeated measurements. All other analyses were  
40  
41 202 performed using the Statistical Package of Social Sciences version 21.0 for Windows (IBM Corp.,  
42  
43 203 Armonk, NY, USA).

## 204 Results

51 205 A total of 8976 pregnancies were included in the Generation R study. In total, we included  
52  
53 206 8617 pregnancies for analyses (**Figure 1**). **Table 1** depicts the baseline characteristics of both the total  
54  
55 207 study population and the population stratified according to the quartiles of neighbourhood deprivation.  
56  
57 208 Women in the total study population were on average 29.6 years old with a median BMI of 22.8  
58  
59 209 kg/m<sup>2</sup>. Stratification of the population in deprivation quartiles revealed that 2170 women (25.2%)



1  
2  
3 210 lived in a neighbourhood with the most deprivation, i.e. lowest status score, and 2149 (24.9%) lived in  
4  
5 211 the least deprived neighbourhoods, i.e. the highest status score. When comparing women in the most  
6  
7 212 deprived neighbourhoods to those in the least deprived neighbourhoods, less women were highly  
8  
9 213 educated (23.7% vs. 62.8% ( $p<0.001$ )), more women continued smoking in pregnancy (22.3% vs.  
10  
11 214 11.9% ( $p<0.001$ )) and less women used any folic acid supplements (20.0% vs. 49.7% respectively  
12  
13 215 ( $p<0.001$ )) (**Table 1**). In **Supplemental Table 1** the fetal growth parameters and adverse pregnancy  
14  
15 216 outcomes stratified by quartile of neighbourhood deprivation are presented. Overall, growth  
16  
17 217 parameters are smaller in the most deprived neighbourhoods compared to the least deprived  
18  
19 218 neighbourhoods (e.g. -0.07 SD vs. 0.15 SD, EFW in the third trimester of pregnancy, respectively).

### 219 **Neighbourhood deprivation and fetal growth**

220 **Figure 2** gives the results of the longitudinal analyses on the association between quartiles of  
221 neighbourhood deprivation and fetal head circumference, length, and weight growth patterns from  
222 mid-pregnancy onwards. It shows that compared to the least deprived neighbourhoods, in the more  
223 deprived neighbourhoods fetal head circumferences, length and weight are smaller (for all measures,  
224 the gestational age dependent effect of neighbourhood deprivation on fetal growth was significant  
225 value $<0.05$ ). Regression coefficients for gestational age-independent and gestational age-dependent  
226 effects are given in **Supplemental Table 2**.

227 The associations of neighbourhood deprivation with first trimester and second and third  
228 trimester fetal growth based on regular linear regression models are given in **Supplemental Figure 1**.  
229 In both the basic and adjusted analyses, a positive association between neighbourhood deprivation and  
230 AC was present (difference in AC in the adjusted model, 0.03 SDS [95% CI 0.01, 0.05, P-value 0.002]  
231 per 1 unit increase in neighbourhood status score). In the third trimester of pregnancy a positive  
232 association was found for the HC, AC and EFW (adjusted model difference of 0.04 SDS [95% CI  
233 0.02, 0.05, P-value  $<0.001$ ], 0.04 SDS [95% CI 0.03, 0.06, P-value  $<0.001$ ] and 0.04 SDS [95% CI  
234 0.03, 0.06, P-value  $<0.001$ ] per 1 unit increase in neighbourhood status score, respectively). Overall,  
235 there is a dose-response like association between neighbourhood deprivation and fetal growth, with  
236 stronger associations in the most deprived neighbourhoods compared to the least deprived  
237 neighbourhoods.

1  
2  
3 238 Effect modification analyses showed significant interaction between neighbourhood  
4  
5 239 deprivation and complications in previous pregnancies for PTB (**Supplemental Table 3**). The  
6  
7 240 associations between neighbourhood deprivation and fetal growth and adverse pregnancy outcomes  
8  
9 241 were non-significant in the group with a complication in a previous pregnancy (e.g. HC in late  
10  
11 242 pregnancy attenuates from 0.06 SDS [95%CI 0.05 , 0.08, P-value <0.001] to 0.03 SDS [95%CI -0.05 ,  
12  
13 243 0.11, P-value 0.50] per 1 unit increase in neighbourhood status score) (**Supplemental Table 4**).

#### 15 244 **Neighbourhood deprivation and adverse pregnancy outcomes**

17  
18 245 Results of the regression analysis between neighbourhood deprivation and adverse pregnancy  
19  
20 246 outcomes are presented in **Table 2**. Living in a more affluent neighbourhood was inversely associated  
21  
22 247 with the odds of delivering a SGA neonate (adjusted model, OR 0.91 [95% CI 0.86, 0.97, P-value  
23  
24 248 0.01], independent of maternal sociodemographic or lifestyle factors. Moreover, it was inversely and  
25  
26 249 independently associated with the odds of PTB (adjusted model, OR 0.89 [95% CI 0.82, 0.96, P-value  
27  
28 250 0.01]. The adverse pregnancy outcomes were most prevalent in the neighbourhood with the lowest  
29  
30 251 deprivation status compared to the neighbourhood with the highest social status (SGA: 12.2% vs.  
31  
32 252 7.1%, PTB: 5.9% vs. 3.8%) (**Supplemental Table 1**).

#### 34 253 **Sensitivity analyses**

35  
36 254 The first sensitivity analyses revealed largely similar associations after performing multilevel  
37  
38 255 analyses (**Supplemental Figure 2**). Second, the results of the associations between neighbourhood  
39  
40 256 deprivation and CRL did not change after including all CRL measurements, in comparison to only the  
41  
42 257 CRL measurements below 12 weeks GA (**Supplemental Table 5**). The third sensitivity analyses  
43  
44 258 excluding SGA pregnancies did attenuate the results (**Supplemental Table 6**). Results also did not  
45  
46 259 materially change after other sensitivity analyses in which we additionally adjusted for the household  
47  
48 260 income or adjusted with a different classification of ethnicity (**Supplemental Table 7 and 8**). Results  
49  
50 261 did not materially change for SGA analyses, when adjusting for maternal hypertension in pregnancy  
51  
52 262 (**Supplemental Table 9**). No major differences were observed in confounders before and after  
53  
54 263 multiple imputation (**Supplemental Table 10**).

55  
56 264  
57  
58  
59  
60

## 265 Discussion

### 266 Main findings

267 We observed that living in a more deprived neighbourhood is associated with decreased fetal  
268 growth in the second and third trimester of pregnancy, and with higher odds of small for gestational  
269 age birth and preterm birth.

### 270 Strengths and limitations

271 Strengths of this study include the large number of participants and the availability of  
272 extensive data which allowed us to adjust for a large number of potential confounders. Its population-  
273 based design in a multi-ethnic population results in a good representation of the residents of the city of  
274 Rotterdam. The presence of both residents from deprived and more affluent neighbourhoods in the  
275 study population allowed us to investigate the effect of this exposure extensively. The choice of the  
276 neighbourhood deprivation indicator is another strength of this study. To classify the degree of  
277 neighbourhood deprivation, often composite indexes are used which take factors into account such as  
278 the percentage of educated or employed residents, and income of residents within a specific  
279 neighbourhood.<sup>(27)</sup> We selected the status scores of the Netherlands Institute for Social Research,  
280 because this index is comparable with international indices such as the Index of Multiple Deprivation  
281 and the Jarman score.<sup>(28, 29)</sup> The status scores are a continuous measure, which allows more accurate  
282 analyses compared to a dichotomous measure. Another strength of the study was that missing data of  
283 covariates was handled by applying multiple imputations. In comparison with complete-case analyses  
284 (which was conducted as a sensitivity analysis), this technique maintains the statistical power of the  
285 analyses.

286 Some limitations of this study also merit discussion. First, this data with regard to residency  
287 and pregnancy are over 15 years old, since the Generation R study is an ongoing birth cohort. The  
288 methods of measuring fetal growth are according to standardized measurement methods, that are being  
289 used still. No doubt, there is the possibility that the status of different neighbourhoods are changed  
290 until now. However, no large differences are to be expected. Additionally, both exposure data  
291 (neighbourhood deprivation) and outcome data (fetal growth and pregnancy outcomes) are determined  
292 in short succession. Second, we did not use nutritional data from semi quantitative self-administrated

1  
2  
3 293 food frequency questionnaires, since this FFQ is only validated pregnant women with Dutch ethnic  
4  
5 294 background, which would have diminished the power and external validity of the study. We chose not  
6  
7 295 to adjust for nutritional factors other than alcohol intake and folic acid supplement use, since alcohol  
8  
9 296 intake and folic acid supplement use are strongly correlated with other lifestyle and nutritional  
10  
11 297 habits.(30, 31) Third, we adjusted the analyses for individual factors, to isolate a neighbourhood  
12  
13 298 specific effect. However, we cannot rule out the presence of residual confounding caused by other  
14  
15 299 individual factors that are strongly associated with fetal growth. Next, possible misclassification of  
16  
17 300 neighbourhood deprivation may have occurred if women moved during pregnancy to a neighbourhood  
18  
19 301 with a different status score from the one they moved out of. However, social mobility in pregnancy is  
20  
21 302 limited and if women move, they generally tend to move to a neighbourhood with a comparable  
22  
23 303 deprivation status.(32) Also, income of undeclared work is not taken into account in the area based  
24  
25 304 classification of neighbourhood status scores, while 13% of Dutch residents do or did any form of  
26  
27 305 undeclared work.(33)

30  
31 306 Sixth, the power of the analyses on CRL are lower due to the availability of only one CRL  
32  
33 307 measurement, instead of a repeated assessment of the CRL. A last disadvantage is that participants of  
34  
35 308 cohort studies, even those in more deprived neighbourhoods, generally have a higher level of health  
36  
37 309 awareness and are generally more healthy compared to those who do not participate.(13) This may  
38  
39 310 reduce the generalizability of our findings to the general population.

40  
41 311 Several pathways may explain the disadvantageous effects of living in a deprived  
42  
43 312 neighbourhood on pregnancy.(34) First, it is proposed to be due to the accumulation of risk factors at  
44  
45 313 the individual level.(5) Examples are smoking and inadequate nutrition and lifestyle behaviours.(9)  
46  
47 314 Neighbourhood deprivation then acts as a proxy for the increased prevalence of risk factors within the  
48  
49 315 deprived neighbourhoods. Our findings are substantiated by earlier studies within the Generation R  
50  
51 316 birth cohort, that demonstrate that living in a deprived neighbourhood is accompanied by the  
52  
53 317 accumulation of individual level risk factors. These in turn were associated with adverse pregnancy  
54  
55 318 outcomes.(5) However, we observe that even after correction for the individual level risk factors, the  
56  
57 319 association between neighbourhood deprivation and impaired development and adverse pregnancy  
58  
59 320 outcomes remained, emphasizing an isolated role for neighbourhood deprivation as a risk factor for

1  
2  
3 321 pregnancy. The associations between neighbourhood deprivation and fetal growth and adverse  
4  
5 322 pregnancy outcomes attenuated to non-significance in the population affected by a complication in a  
6  
7 323 previous pregnancy. These complications, and the maternal constitution for the development of it, may  
8  
9 324 thus outweigh the contribution of neighbourhood deprivation in the associations with fetal growth and  
10  
11 325 adverse pregnancy outcomes. This may be due to the fact that past complications in pregnancy are  
12  
13 326 strongly associated with both neighbourhood deprivation and fetal growth and adverse pregnancy  
14  
15 327 outcomes.(35). A second pathway which may explain the disadvantageous effects of living in a  
16  
17 328 deprived neighbourhood on adverse pregnancy outcomes is attributed to the lack of or suboptimal  
18  
19 329 access to facilities such as the possibility to purchase healthy food nearby.(36) Third, living in a  
20  
21 330 deprived neighbourhood is acknowledged as a source of chronic stress, and thereby acts as an  
22  
23 331 independent risk factor for adverse health outcomes.(34, 37) Stress is associated with increased  
24  
25 332 cortisol levels, and both prolonged or repeated cortisol exposure increases the risk for impaired  
26  
27 333 physical health.(38) Also with regard to pregnancy, stress is demonstrated to be harmful since  
28  
29 334 maternal stress during pregnancy is associated with preterm birth, lower birthweight and the onset of  
30  
31 335 preeclampsia and gestational diabetes.(12, 39)

32  
33  
34 336 Our data demonstrates that the associations between neighbourhood deprivation and fetal  
35  
36 337 growth become stronger over the course of pregnancy. This may be due to the fact that there are  
37  
38 338 different mechanisms by which external factors -such as environmental, nutritional and lifestyle  
39  
40 339 factors- affect the developing fetus over the different trimesters of pregnancy. In the first trimester of  
41  
42 340 pregnancy the embryo depends on the uterine glands and yolk sac for the provision of nutrients, while  
43  
44 341 in the subsequent periods of pregnancy there is an exchange of nutrients between the maternal and  
45  
46 342 fetal circulations across the placenta.(40) The more isolated source of nutrition in the first trimester  
47  
48 343 compared to the second and third trimester of pregnancy may decrease the sensitivity of first trimester  
49  
50 344 embryonic growth to external influences.

51  
52  
53 345 A previous study of our group, observed a negative association between neighbourhood  
54  
55 346 deprivation and first trimester growth. The larger embryos in deprived neighbourhoods were  
56  
57 347 hypothesized to be explained by strong unmeasured intrinsic and extrinsic factors, such as mental  
58  
59 348 stressors.(41) The difference in direction of effects between that study and our current findings, may

1  
2  
3 349 be due to the different source populations; the first study was conducted in a tertiary-hospital based  
4  
5 350 cohort, while the present study is performed within a population-based cohort.  
6  
7

### 8 351 **Future perspectives**

9 352 In future studies, a potential power issue due to the small measurement differences in first  
10  
11 353 trimester growth measurements may be prevented by using larger study sample sizes. Moreover more  
12  
13 354 accurate measures of early fetal growth with higher quality ultrasound could increase the variability of  
14  
15 355 the measurements which enables detection of very small differences. Additionally, animal studies may  
16  
17 356 help unravel the underlying mechanisms through which neighbourhood deprivation affect pregnancy.  
18  
19 357 For instance, by further investigating how maternal stress affects placental nutrient transport.  
20  
21 358 Moreover, additional research on the pathways between neighbourhood deprivation and fetal growth  
22  
23 359 and pregnancy outcomes could be performed.  
24  
25

26 360 Although the magnitude of our findings is somewhat small, the results of this study suggest an  
27  
28 361 isolated risk for living in a deprived neighbourhood. This emphasizes the importance of policies that  
29  
30 362 promote healthier neighbourhoods. This could be achieved by targeted population-level interventions.  
31  
32 363 A review has demonstrated many area-based initiatives that have been implemented in deprived areas  
33  
34 364 across Western-Europe already.(42) Initiatives may consist of interventions that aim to tackle the  
35  
36 365 various problems in deprived areas, with regard to the physical (more walkable neighbourhoods,  
37  
38 366 increasing green environments, reducing air pollution and the reduction of litter.) and social domain  
39  
40 367 (lowering crime rates, vandalism).(43) Small effects of these interventions may be expected in terms  
41  
42 368 of differences in fetal growth and birthweight. Though some very small individual effects may still  
43  
44 369 have clinical and public health relevance, e.g. when they affect a large segment of the population, or  
45  
46 370 when a small effect has long term implications, as is the case with birthweight.  
47  
48

49 371 In the Netherlands, in both the prenatal and postnatal setting, screening for non-medical risk  
50  
51 372 factors is starting to become part of daily medical practice.(44, 45) This allows early interventions in  
52  
53 373 order to prevent developmental problems of children in later life. However, we propose a shift of  
54  
55 374 attention towards an earlier window of opportunity: the preconception period and first trimester of  
56  
57 375 pregnancy. This periconception period provides the opportunity to optimize the conditions of  
58  
59  
60

1  
2  
3 376 pregnancy and thereby decrease the risks of adverse outcomes and all their long-term  
4  
5 377 consequences.(46)

6  
7 378 Additionally, it is important to create more awareness among politicians, policymakers and  
8  
9 379 public health workers. They could help to embed neighbourhood deprivation in the context of health  
10  
11 380 promotion, by developing and promoting targeted preventive intervention programs.(47) These  
12  
13 381 programs could specifically focus on residents of deprived neighbourhoods. It is important to stimulate  
14  
15 382 these residents to diminish risk factors on the individual level, for instance to quit smoking and abstain  
16  
17 383 from alcohol. This could also help to narrow health inequalities between neighbourhoods and between  
18  
19 384 groups of different socioeconomic status.  
20  
21  
22  
23

## 24 385 **Conclusion**

25  
26 386 In conclusion, we observed a negative association between neighbourhood deprivation, fetal  
27  
28 387 growth and prematurity. This emphasizes the need for a comprehensive research, care and policy  
29  
30 388 approach from the preconception phase onwards, to mitigate the risk of adverse pregnancy outcomes  
31  
32 389 due to deprivation.  
33  
34  
35  
36  
37  
38  
39  
40  
41  
42  
43  
44  
45  
46  
47  
48  
49  
50  
51  
52  
53  
54  
55  
56  
57  
58  
59  
60

1  
2  
3 390 **Twitter** Dionne Gootjes @dvvgootjes  
4

5 391

6  
7 392 **Acknowledgements** The Generation R Study is conducted by the Erasmus Medical Centre in close  
8  
9 393 collaboration with the School of Law and the Faculty of Social Sciences at the Erasmus University,  
10  
11 394 Rotterdam, the Municipal Health Service, Rotterdam area and the Stichting Trombosedienst and  
12  
13 395 Artsenlaboratorium Rijnmond (Star-MDC), Rotterdam. We gratefully acknowledge the contribution of  
14  
15 396 children and their parents, general practitioners, hospitals, midwives and pharmacies in Rotterdam.  
16  
17

18 397  
19  
20 398 **Author Contributions** All authors made a substantive contribution to the manuscript. DG analyzed  
21  
22 399 the data and wrote the article. AP, VJ, and ES contributed to the design of the paper, interpretation of  
23  
24 400 the data, revisions and gave input at all stages of the study. All authors have approved the final version  
25  
26 401 of the manuscript.  
27

28  
29 402 **Funding:** The Generation R Study was made possible by financial support from Erasmus MC,  
30  
31 403 University Medical Centre Rotterdam, the Netherlands; the Netherlands Organization for Health  
32  
33 404 Research and Development; the Netherlands Organization for Scientific Research; the Ministry of  
34  
35 405 Health, Welfare and Sport; and the Ministry of Youth and Families. Prof. Dr. Vincent Jaddoe received  
36  
37 406 additional grants from the Netherlands Organization for Health Research and Development (grants  
38  
39 407 90700303 and 916.10159, and VIDI 016.136.361) and a Consolidator Grant from the European  
40  
41 408 Research Council (ERC-2014-CoG-64916).  
42

43  
44 409 **Competing interests:** None declared.  
45

46  
47 410 **Patient and public involvement:** This research was done without patient involvement.  
48

49  
50 411 **Patient consent for publication:** Not required.  
51

52  
53 412 **Ethics approval** The study has been approved by the Medical Ethical Committee of the Erasmus  
54  
55 413 Medical Centre in Rotterdam on December 17th 2001 (MEC 198.782/2001/31). Written consent was  
56  
57 414 obtained from all participants.  
58

59  
60 415 **Data availability statement** Data requests can be made to the secretariat of Generation R.



1  
2  
3 **416 ORCID iDs**  
4

5  
6 417 Dionne Gootjes <https://orcid.org/0000-0002-9382-9031>  
7

8  
9 418 Anke Posthumus <https://orcid.org/0000-0002-4882-3474>  
10

11  
12 419 Vincent Jaddoe <https://orcid.org/0000-0003-2939-0041>  
13

14  
15 420 Eric Steegers <https://orcid.org/0000-0001-6658-9274>  
16  
17  
18  
19  
20  
21  
22  
23  
24  
25  
26  
27  
28  
29  
30  
31  
32  
33  
34  
35  
36  
37  
38  
39  
40  
41  
42  
43  
44  
45  
46  
47  
48  
49  
50  
51  
52  
53  
54  
55  
56  
57  
58  
59  
60

For peer review only

1  
2  
3 421 **Tables and figures**  
4

5  
6 422 **Figure 1. Flowchart of the study population.**  
7

8  
9 423 **Figure 2. Associations of neighbourhood deprivation with fetal growth.**  
10

11  
12 424 **Table 1. Baseline characteristics of the study population, stratified for quartiles of the**  
13  
14 425 **neighbourhood status score.**  
15

16  
17 426 **Table 2. Associations between the neighbourhood status score and adverse pregnancy outcomes.**  
18  
19  
20  
21  
22  
23  
24  
25  
26  
27  
28  
29  
30  
31  
32  
33  
34  
35  
36  
37  
38  
39  
40  
41  
42  
43  
44  
45  
46  
47  
48  
49  
50  
51  
52  
53  
54  
55  
56  
57  
58  
59  
60

For peer review only

1  
2  
3 **427 Supplemental material**  
4

5  
6 **428 Supplemental Table 1. Fetal growth and adverse pregnancy outcomes in the study population,**  
7  
8 **429 stratified for quartiles of the neighbourhood status score.**  
9

10  
11 **430 Supplemental Table 2. Regression coefficients of longitudinal associations between quartiles of**  
12  
13 **431 neighbourhood deprivation with fetal growth patterns.**  
14

15  
16 **432 Supplemental Table 3. P-value of interaction terms (neighbourhood deprivation \* parity and**  
17  
18 **433 neighbourhood status score \* complications in a previous pregnancy).**  
19

20  
21 **434 Supplemental Table 4. Associations between the neighbourhood SES and fetal growth and**  
22  
23 **435 adverse pregnancy outcomes, split for nulliparous women, multiparous women without a**  
24  
25 **436 complications in a previous pregnancy or multiparous women with a complications in a previous**  
26  
27 **437 pregnancy.**  
28

29  
30 **438 Supplemental Table 5. Sensitivity analysis with all available CRL measurements in the study**  
31  
32 **439 population.**  
33

34  
35 **440 Supplemental Table 6. Associations between the neighbourhood SES and fetal growth in a**  
36  
37 **441 selected cohort of non-SGA pregnancies.**  
38

39  
40 **442 Supplemental Table 7. Associations between the neighbourhood status score and fetal growth,**  
41  
42 **443 additionally adjusted for household income.**  
43

44  
45 **444 Supplemental Table 8. Associations between the neighbourhood status score and fetal growth,**  
46  
47 **445 adjusted for different classification of ethnicity.**  
48

49  
50 **446 Supplemental Table 9. Associations between the neighbourhood status score and SGA pregnancies,**  
51  
52 **447 adjusted for maternal hypertension.**  
53

54 **448 Supplemental Table 10. Observed and expected values of covariates.**  
55

---

56  
57 **449 Supplemental Figure 1. Associations between the neighbourhood deprivation and fetal growth**  
58  
59 **450 parameters.**  
60

1  
2  
3 451 **Supplemental Figure 2. Multilevel regression analysis of associations between neighbourhood**  
4 **deprivation and first trimester and fetal growth measurements.**

5  
6  
7 453 **Supplemental 1. First trimester and fetal growth, measurement guidelines.**

8  
9  
10 454 **Supplemental 2. Multiple imputations for missing data of covariates**

11  
12  
13 455

14  
15  
16  
17  
18  
19  
20  
21  
22  
23  
24  
25  
26  
27  
28  
29  
30  
31  
32  
33  
34  
35  
36  
37  
38  
39  
40  
41  
42  
43  
44  
45  
46  
47  
48  
49  
50  
51  
52  
53  
54  
55  
56  
57  
58  
59  
60

For peer review only

**Table 1.** Baseline characteristics of the study population, stratified for quartiles of neighbourhood deprivation.

| Maternal characteristics               | Total study population<br>n = 8617 | Lowest deprivation quartile<br>n = 2170 | Second deprivation quartile<br>n = 2208 | Third deprivation quartile<br>n = 2090 | Highest deprivation quartile<br>n = 2149 | p-value |
|----------------------------------------|------------------------------------|-----------------------------------------|-----------------------------------------|----------------------------------------|------------------------------------------|---------|
| Neighbourhood status score             | -1.13 (1.39)                       | -2.96 (0.51)                            | -1.62 (0.31)                            | -0.51 (0.37)                           | 0.61 (0.49)                              | <0.001  |
| Age at intake                          | 29.6 (5.3)                         | 28.1 (5.5)                              | 28.7 (5.7)                              | 30.2 (4.9)                             | 31.6 (4.1)                               | <0.001  |
| ≤18 years                              | 83 (1.0%)                          | 33 (1.5 %)                              | 35 (1.6%)                               | 12 (0.6%)                              | 3 (0.1%)                                 |         |
| >18 and ≤35 years                      | 7256 (84.2%)                       | 1888 (87.0%)                            | 1867 (84.6%)                            | 1760 (84.2%)                           | 1741 (81.0%)                             |         |
| >35 years                              | 1278 (14.8%)                       | 249 (11.5%)                             | 306 (13.8%)                             | 318 (15.2%)                            | 405 (18.9%)                              |         |
| Pre-pregnancy body mass index          | 22.8 (18.4 – 32.2)                 | 23.5 (18.0 – 33.6)                      | 23.0 (18.1 – 32.5)                      | 22.9 (18.2 – 32.0)                     | 22.3 (18.5– 30.1)                        | <0.001  |
| ≤18.5 kg/m <sup>2</sup>                | 492 (5.7%)                         | 1233 (56.8%)                            | 1343 (60.8%)                            | 118 (5.6%)                             | 112 (5.2%)                               |         |
| >18.5 and ≤25 kg/m <sup>2</sup>        | 5436 (63.0%)                       | 815 (37.6%)                             | 726 (32.9%)                             | 1315 (62.9%)                           | 1546 (71.9%)                             |         |
| >25 kg/m <sup>2</sup>                  | 2689 (31.3%)                       |                                         |                                         | 657 (31.4%)                            | 491 (22.8%)                              |         |
| Parity (nulliparous)                   | 4796 (55.7)                        | 1090 (50.2)                             | 1273 (57.7)                             | 1227 (58.7)                            | 1205 (56.1)                              | <0.001  |
| Educational level                      |                                    |                                         |                                         |                                        |                                          | <0.001  |
| Lower/no                               | 1101 (12.8%)                       | 503 (23.2)                              | 366 (16.5)                              | 179 (8.5)                              | 52 (2.4)                                 |         |
| Middle                                 | 4060 (47.1)                        | 1153 (53.1)                             | 1152 (52.2)                             | 1007 (48.2)                            | 747 (34.8)                               |         |
| High                                   | 3456 (40.1)                        | 514 (23.7)                              | 690 (31.3)                              | 904 (43.3)                             | 1349 (62.8)                              |         |
| Ethnicity                              |                                    |                                         |                                         |                                        |                                          | <0.001  |
| Dutch and Western                      | 4967 (57.6%)                       | 636 (29.3)                              | 1084 (49.1)                             | 1426 (68.2)                            | 1821 (84.7)                              |         |
| Turkish and Moroccan                   | 1464 (17.0%)                       | 714 (32.9)                              | 471 (21.3)                              | 222 (10.6)                             | 57 (2.7)                                 |         |
| African                                | 1178 (13.7%)                       | 519 (23.9)                              | 370 (16.8)                              | 211 (10.1)                             | 78 (3.6)                                 |         |
| Asian                                  | 1008 (11.7%)                       | 301 (13.9)                              | 283 (12.8)                              | 231 (11.1)                             | 193 (9.0)                                |         |
| Smoking                                |                                    |                                         |                                         |                                        |                                          | <0.001  |
| Never smoked during pregnancy          | 6256 (72.6%)                       | 1515 (69.8)                             | 1523 (69.0)                             | 1518 (72.6)                            | 1700 (79.1)                              |         |
| Smoked until pregnancy was known       | 735 (8.5%)                         | 171 (7.9)                               | 183 (8.3)                               | 188 (9.0)                              | 193 (9.0)                                |         |
| Continued smoking in pregnancy         | 1626 (18.9%)                       | 484 (22.3)                              | 502 (22.7)                              | 384 (18.4)                             | 256 (11.9)                               |         |
| Alcohol                                |                                    |                                         |                                         |                                        |                                          | <0.001  |
| Never alcohol consumption in pregnancy |                                    |                                         |                                         |                                        |                                          |         |

|    |                              |              |              |              |             |              |                  |
|----|------------------------------|--------------|--------------|--------------|-------------|--------------|------------------|
| 1  |                              |              |              |              |             |              |                  |
| 2  |                              |              |              |              |             |              |                  |
| 3  | pregnancy                    | 4351 (50.5%) | 1436 (66.2)  | 1200 (54.4)  | 990 (47.4)  | 726 (33.8)   |                  |
| 4  | Alcohol consumption until    | 1149 (13.3%) | 220 (10.1)   | 239 (10.8)   | 335 (16.0)  | 354 (16.5)   |                  |
| 5  | pregnancy was known          | 3117 (36.2%) | 514 (23.7)   | 769 (34.8)   | 765 (36.6)  | 1069 (49.7)  |                  |
| 6  | Continued alcohol            |              |              |              |             |              |                  |
| 7  | consumption in pregnancy     |              |              |              |             |              |                  |
| 8  |                              |              |              |              |             |              |                  |
| 9  | Folic acid supplement intake |              |              |              |             |              | <b>&lt;0.001</b> |
| 10 | None                         | 2751 (31.9%) | 1141 (52.6)  | 843 (38.2)   | 534 (25.6)  | 233 (10.8)   |                  |
| 11 | Start in first 10 weeks of   | 2661 (30.9%) | 594 (27.4)   | 703 (31.8)   | 650 (31.1)  | 714 (33.2)   |                  |
| 12 | pregnancy                    | 3205 (37.2%) | 435 (20.0)   | 662 (30.0)   | 906 (43.3)  | 1202 (55.9)  |                  |
| 13 | Start preconceptionally      |              |              |              |             |              |                  |
| 14 | Hypertension                 |              |              |              |             |              | 0.11             |
| 15 | Pregnancy induced            | 311 (3.6%)   | 69 (3.2%)    | 80 (3.6%)    | 74 (3.5%)   | 88 (4.1%)    |                  |
| 16 | hypertension                 | 142 (1.6%)   | 54 (2.5%)    | 36 (1.6%)    | 29 (1.4%)   | 23 (1.1%)    |                  |
| 17 | Pre-eclampsia                | 29 (0.3%)    | 4 (0.2%)     | 9 (0.4%)     | 8 (0.4%)    | 8 (0.4%)     |                  |
| 18 | HELLP                        |              |              |              |             |              |                  |
| 19 | Gestational diabetes         | 89 (1.0%)    | 21 (1.0%)    | 32 (1.4%)    | 24 (1.1%)   | 12 (0.6%)    | <b>0.03</b>      |
| 20 | Birth weight                 |              |              |              |             |              | <b>&lt;0.01</b>  |
| 21 | ≤2500 grams                  | 431 (5.0%)   | 118 (5.4%)   | 135 (6.1%)   | 110 (5.3%)  | 68 (3.2%)    |                  |
| 22 | >2500 grams and ≤4000        | 7017 (81.4%) | 1815 (83.6%) | 1786 (80.9%) | 1683        | 1733 (80.6%) |                  |
| 23 | grams                        | 1169 (13.6%) | 237 (11.0%)  | 287 (13.0%)  | (80.5%)     | 348 (16.2%)  |                  |
| 24 | >4000 grams                  |              |              |              | 297         |              |                  |
| 25 |                              |              |              |              | (14.2%)     |              |                  |
| 26 | Gestational age at delivery  |              |              |              |             |              | <b>0.01</b>      |
| 27 | <37 weeks gestational        | 492 (5.7%)   | 134 (6.2%)   | 152 (6.9%)   | 117 (5.6%)  | 89 (4.1%)    |                  |
| 28 | age                          | 7697 (89.3%) | 1937 (89.3%) | 1947 (88.2%) | 1859        | 1954 (90.9)  |                  |
| 29 | .37-42 weeks gestational     | 428 (5.0%)   | 99 (4.5%)    | 109 (4.9%)   | (88.9%)     | 106 (5.0%)   |                  |
| 30 | age                          |              |              |              | 114 (5.5%)  |              |                  |
| 31 | >42 weeks gestational        |              |              |              |             |              |                  |
| 32 | age                          |              |              |              |             |              |                  |
| 33 | Complications in a previous  | 606 (7.0%)   | 153 (7.1%)   | 149 (6.7%)   | 132 (6.3%)  | 172 (8.0%)   | 0.13             |
| 34 | pregnancy                    |              |              |              |             |              |                  |
| 35 | Betal sex (male)             | 4347 (50.4)  | 1063 (49.0)  | 1147 (51.9)  | 1066 (51.0) | 1071 (49.8)  | 0.22             |

458 Data are represented as n (%), mean (SD) or median with the 90% range. Differences in baseline  
 459 characteristics were tested using ANOVA, Kruskal-Wallis tests and chi-square tests. Confounders are  
 460 imputed. Non imputed percentages are valid percentages.

461 **Table 2.** Associations between the neighbourhood status score and adverse pregnancy outcomes.

| Study population                 | Model    | Lowest deprivation quartile  | Second deprivation quartile | Third deprivation quartile   | Highest deprivation quartile |                             |                           |                             |                  |
|----------------------------------|----------|------------------------------|-----------------------------|------------------------------|------------------------------|-----------------------------|---------------------------|-----------------------------|------------------|
| n = 8617                         |          | n = 2277                     | n = 2123                    | n = 2084                     | n = 2133                     |                             |                           |                             |                  |
|                                  |          | $\beta$ / OR (95% CI)        | $\beta$ / OR (95% CI)       | $\beta$ / OR (95% CI)        |                              |                             |                           |                             |                  |
| <b>Small for gestational age</b> | Basic    | <b>261</b><br><b>(11.5%)</b> | <b>1.80 (1.46 ; 2.22)</b>   | <b>220</b><br><b>(10.4%)</b> | <b>1.46 (1.17 ; 1.81)</b>    | <b>190</b><br><b>(9.1%)</b> | <b>1.31 (1.05 ; 1.64)</b> | <b>153</b><br><b>(7.2%)</b> | <i>Reference</i> |
|                                  | Adjusted |                              | <b>1.39 (1.09 ; 1.77)</b>   |                              | 1.14 (0.90 ; 1.44)           |                             | 1.13 (0.90 ; 1.42)        |                             | <i>Reference</i> |
| <b>Preterm birth</b>             | Basic    | <b>129</b><br><b>(5.6%)</b>  | <b>1.60 (1.21 ; 2.13)</b>   | <b>142</b><br><b>(6.7%)</b>  | <b>1.76 (1.33 ; 2.32)</b>    | <b>109</b><br><b>(5.2%)</b> | <b>1.41 (1.05 ; 1.89)</b> | <b>81</b><br><b>(3.8%)</b>  | <i>Reference</i> |
|                                  | Adjusted |                              | <b>1.52 (1.11 ; 2.09)</b>   |                              | <b>1.65 (1.23 ; 2.22)</b>    |                             | 1.32 (0.97 ; 1.77)        |                             | <i>Reference</i> |

462 Abbreviations:  $\beta$ : beta; OR: odds ratio. Values are odds ratios with the 95% CI of the data in SD-score and are based on logistic regression models. Basic  
463 model: by the use of SD scores it is automatically adjusted for gestational age. Adjusted model: basic model and additionally adjusted for maternal age,  
464 educational level, smoking, alcohol use, folic acid supplement use, ethnicity, parity, pre-pregnancy body mass index and fetal sex. p-for trend analysis with the  
465 neighbourhood deprivation as a continuous measure. Small size for gestational age (SGA) at birth was defined as a sex and gestational age adjusted  
466 birthweight below the 10th percentile (<-1.40 SD-score) in the study cohort. Preterm birth (PTB) was defined as a gestational age of <37 weeks at delivery.

467 **References**

- 468 1. Mackenbach JP, Cavelaars AE, Kunst AE, Groenhouf F. Socioeconomic inequalities in  
469 cardiovascular disease mortality; an international study. *Eur Heart J*. 2000;21(14):1141-51.
- 470 2. Pickett KE, Pearl M. Multilevel analyses of neighbourhood socioeconomic context and health  
471 outcomes: a critical review. *J Epidemiol Community Health*. 2001;55(2):111-22.
- 472 3. Vos AA, Posthumus AG, Bonsel GJ, Steegers EA, Denktas S. Deprived neighborhoods and  
473 adverse perinatal outcome: a systematic review and meta-analysis. *Acta Obstet Gynecol Scand*.  
474 2014;93(8):727-40.
- 475 4. de Graaf JP, Ravelli AC, de Haan MA, Steegers EA, Bonsel GJ. Living in deprived urban districts  
476 increases perinatal health inequalities. *J Matern Fetal Neonatal Med*. 2013;26(5):473-81.
- 477 5. Timmermans S, Bonsel GJ, Steegers-Theunissen RP, Mackenbach JP, Steyerberg EW, Raat H,  
478 et al. Individual accumulation of heterogeneous risks explains perinatal inequalities within deprived  
479 neighbourhoods. *Eur J Epidemiol*. 2011;26(2):165-80.
- 480 6. Mook-Kanamori DO, Steegers EA, Eilers PH, Raat H, Hofman A, Jaddoe VW. Risk factors and  
481 outcomes associated with first-trimester fetal growth restriction. *JAMA*. 2010;303(6):527-34.
- 482 7. Ashworth CJ, Toma LM, Hunter MG. Nutritional effects on oocyte and embryo development  
483 in mammals: implications for reproductive efficiency and environmental sustainability. *Philos Trans R*  
484 *Soc Lond B Biol Sci*. 2009;364(1534):3351-61.
- 485 8. Cetin I, Berti C, Calabrese S. Role of micronutrients in the periconceptional period. *Hum*  
486 *Reprod Update*. 2010;16(1):80-95.
- 487 9. Van Dijk MR, Borggreven NV, Willemsen SP, Koning AHJ, Steegers-Theunissen RPM, Koster  
488 MPH. Maternal Lifestyle Impairs Embryonic Growth: The Rotterdam Periconception Cohort. *Reprod*  
489 *Sci*. 2018;25(6):916-22.
- 490 10. Barker DJ. Fetal origins of coronary heart disease. *BMJ*. 1995;311(6998):171-4.
- 491 11. Rutter DR, Quine L. Inequalities in pregnancy outcome: a review of psychosocial and  
492 behavioural mediators. *Soc Sci Med*. 1990;30(5):553-68.
- 493 12. Vehmeijer FOL, Guxens M, Duijts L, El Marroun H. Maternal psychological distress during  
494 pregnancy and childhood health outcomes: a narrative review. *J Dev Orig Health Dis*. 2019;10(3):274-  
495 85.
- 496 13. Kooijman MN, Kruithof CJ, van Duijn CM, Duijts L, Franco OH, van IMH, et al. The Generation  
497 R Study: design and cohort update 2017. *Eur J Epidemiol*. 2016;31(12):1243-64.
- 498 14. National Institute for Public Health and the Environment. Sociaaleconomische status 2017  
499 [Available from: [https://www.volksgezondheidenzorg.info/onderwerp/sociaaleconomische-  
500 status/regionaal-internationaal/regionaal#node-sociaaleconomische-status](https://www.volksgezondheidenzorg.info/onderwerp/sociaaleconomische-status/regionaal-internationaal/regionaal#node-sociaaleconomische-status). .
- 501 15. Blaas HG, Eik-Nes SH, Bremnes JB. The growth of the human embryo. A longitudinal  
502 biometric assessment from 7 to 12 weeks of gestation. *Ultrasound Obstet Gynecol*. 1998;12(5):346-  
503 54.
- 504 16. van Uiter EM, Exalto N, Burton GJ, Willemsen SP, Koning AH, Eilers PH, et al. Human  
505 embryonic growth trajectories and associations with fetal growth and birthweight. *Hum Reprod*.  
506 2013;28(7):1753-61.
- 507 17. van der Kooy J, Poeran J, de Graaf JP, Birnie E, Denktas S, Steegers EAP, et al. Planned home  
508 compared with planned hospital births in the Netherlands: intrapartum and early neonatal death in  
509 low-risk pregnancies. *Obstet Gynecol*. 2011;118(5):1037-46.
- 510 18. Poeran J, Borsboom GJ, de Graaf JP, Birnie E, Steegers EA, Bonsel GJ. Population attributable  
511 risks of patient, child and organizational risk factors for perinatal mortality in hospital births. *Matern*  
512 *Child Health J*. 2015;19(4):764-75.
- 513 19. Hadlock FP, Harrist RB, Sharman RS, Deter RL, Park SK. Estimation of fetal weight with the use  
514 of head, body, and femur measurements--a prospective study. *Am J Obstet Gynecol*.  
515 1985;151(3):333-7.



- 1  
2  
3 516 20. Verburg BO, Steegers EA, De Ridder M, Snijders RJ, Smith E, Hofman A, et al. New charts for  
4 517 ultrasound dating of pregnancy and assessment of fetal growth: longitudinal data from a population-  
5 518 based cohort study. *Ultrasound Obstet Gynecol.* 2008;31(4):388-96.
- 6 519 21. Niklasson A, Ericson A, Fryer JG, Karlberg J, Lawrence C, Karlberg P. An update of the Swedish  
7 520 reference standards for weight, length and head circumference at birth for given gestational age  
8 521 (1977-1981). *Acta Paediatr Scand.* 1991;80(8-9):756-62.
- 9 522 22. Verburg BO, Mulder PG, Hofman A, Jaddoe VW, Witteman JC, Steegers EA. Intra- and  
10 523 interobserver reproducibility study of early fetal growth parameters. *Prenat Diagn.* 2008;28(4):323-  
11 524 31.
- 12 525 23. Gaillard R, de Ridder MA, Verburg BO, Witteman JC, Mackenbach JP, Moll HA, et al.  
13 526 Individually customised fetal weight charts derived from ultrasound measurements: the Generation R  
14 527 Study. *Eur J Epidemiol.* 2011;26(12):919-26.
- 15 528 24. Twisk JWR. *Applied Longitudinal Data Analysis for Epidemiology: A Practical Guide.* 2 ed.  
16 529 Cambridge: Cambridge University Press; 2013.
- 17 530 25. Sterne JA, White IR, Carlin JB, Spratt M, Royston P, Kenward MG, et al. Multiple imputation  
18 531 for missing data in epidemiological and clinical research: potential and pitfalls. *BMJ.* 2009;338:b2393.
- 19 532 26. DG Altman. *Practical statistics for medical research.* . London, UK: Chapman & Hall; 1999.
- 20 533 27. Rajaratnam JK, Burke JG, O'Campo P. Maternal and child health and neighborhood context:  
21 534 the selection and construction of area-level variables. *Health Place.* 2006;12(4):547-56.
- 22 535 28. Noble M, Wright G, Smith G, Dibben C. Measuring Multiple Deprivation at the Small-Area  
23 536 Level. *Environment and Planning A: Economy and Space.* 2006;38(1):169-85.
- 24 537 29. Jarman B. Underprivileged areas: validation and distribution of scores. *Br Med J (Clin Res Ed).*  
25 538 1984;289(6458):1587-92.
- 26 539 30. Kang H-G, Joo HH, Choi KD, Lee D, Moon J. Complementarity in dietary supplements and  
27 540 foods: are supplement users vegetable eaters? *Food Nutr Res.* 2017;61(1):1361769-.
- 28 541 31. Kirk SF, Cade JE, Barrett JH, Conner M. Diet and lifestyle characteristics associated with  
29 542 dietary supplement use in women. *Public Health Nutr.* 1999;2(1):69-73.
- 30 543 32. Reitsma JB, Kardaun JW, Gevers E, de Bruin A, van der Wal J, Bonsel GJ. [Possibilities for  
31 544 anonymous follow-up studies of patients in Dutch national medical registrations using the Municipal  
32 545 Population Register: a pilot study]
- 33 546 Mogelijkheden voor anoniem follow-uponderzoek van patienten in landelijke medische registraties  
34 547 met behulp van de Gemeentelijke Basisadministratie: een pilotonderzoek. *Ned Tijdschr Geneeskd.*  
35 548 2003;147(46):2286-90.
- 36 549 33. Winden de M, Zuurbier. Een onderzoek naar zwartwerk onder uitkeringsgerechtigden en de  
37 550 totale bevolking in 2010. Voorburg/Heerlen.: 2011.
- 38 551 34. de Graaf JP, Steegers EA, Bonsel GJ. Inequalities in perinatal and maternal health. *Curr Opin*  
39 552 *Obstet Gynecol.* 2013;25(2):98-108.
- 40 553 35. Posthumus AG, Birnie E, van Veen MJ, Steegers EA, Bonsel GJ. An antenatal prediction model  
41 554 for adverse birth outcomes in an urban population: The contribution of medical and non-medical  
42 555 risks. *Midwifery.* 2016;38:78-86.
- 43 556 36. Agyemang C, Vrijkotte TG, Droomers M, van der Wal MF, Bonsel GJ, Stronks K. The effect of  
44 557 neighbourhood income and deprivation on pregnancy outcomes in Amsterdam, The Netherlands. *J*  
45 558 *Epidemiol Community Health.* 2009;63(9):755-60.
- 46 559 37. Jokela M. Does neighbourhood deprivation cause poor health? Within-individual analysis of  
47 560 movers in a prospective cohort study. *J Epidemiol Community Health.* 2015;69(9):899-904.
- 48 561 38. Cohen S, Janicki-Deverts D, Miller GE. Psychological stress and disease. *JAMA.*  
49 562 2007;298(14):1685-7.
- 50 563 39. Henrichs J, Schenk JJ, Roza SJ, van den Berg MP, Schmidt HG, Steegers EA, et al. Maternal  
51 564 psychological distress and fetal growth trajectories: the Generation R Study. *Psychol Med.*  
52 565 2010;40(4):633-43.
- 53  
54  
55  
56  
57  
58  
59  
60

- 1  
2  
3 566 40. Burton GJ, Hempstock J, Jauniaux E. Nutrition of the human fetus during the first trimester--a  
4 567 review. *Placenta*. 2001;22 Suppl A:S70-7.
- 5 568 41. Gootjes DV, Koster MPH, Willemsen SP, Koning AHJ, Steegers EAP, Steegers-Theunissen RPM.  
6 569 The Impact of Neighbourhood Deprivation on Embryonic Growth Trajectories: Rotterdam  
7 570 Periconception Cohort. *J Clin Med*. 2019;8(11).
- 8 571 42. Atkinson. *Urban Design and Planning*. Volume 161 2008. p. 115-22.
- 9 572 43. Kramer D, Harting J, Kunst AE. Understanding the impact of area-based interventions on area  
10 573 safety in deprived areas: realist evaluation of a neighbour nuisance intervention in Arnhem, the  
11 574 Netherlands. *BMC Public Health*. 2016;16:291.
- 12 575 44. Waelput AJM, Sijpkens MK, Lagendijk J, van Minde MRC, Raat H, Ernst-Smelt HE, et al.  
13 576 Geographical differences in perinatal health and child welfare in the Netherlands: rationale for the  
14 577 healthy pregnancy 4 all-2 program. *BMC Pregnancy Childbirth*. 2017;17(1):254.
- 15 578 45. Lagendijk J, Vos AA, Bertens LCM, Denktas S, Bonsel GJ, Steyerberg EW, et al. Antenatal non-  
16 579 medical risk assessment and care pathways to improve pregnancy outcomes: a cluster randomised  
17 580 controlled trial. *Eur J Epidemiol*. 2018;33(6):579-89.
- 18 581 46. Steegers EAP, Barker ME, Steegers-Theunissen RPM, Williams MA. Societal Valorisation of  
19 582 New Knowledge to Improve Perinatal Health: Time to Act. *Paediatric and perinatal epidemiology*.  
20 583 2016;30(2):201-4.
- 21 584 47. van Voorst SF, Vos AA, de Jong-Potjer LC, Waelput AJM, Steegers EAP, Denktas S.  
22 585 Effectiveness of general preconception care accompanied by a recruitment approach: protocol of a  
23 586 community-based cohort study (the Healthy Pregnancy 4 All study). *BMJ open*. 2015;5(3):e006284-e.

27  
28  
29  
30  
31  
32  
33  
34  
35  
36  
37  
38  
39  
40  
41  
42  
43  
44  
45  
46  
47  
48  
49  
50  
51  
52  
53  
54  
55  
56  
57  
58  
59  
60

1  
2  
3 **Figure 1.** Flowchart of the study population.  
4

5  
6  
7  
8  
9  
10  
11  
12  
13  
14  
15  
16  
17  
18  
19  
20  
21  
22  
23  
24  
25  
26  
27  
28  
29  
30  
31  
32  
33  
34  
35  
36  
37  
38  
39  
40  
41  
42  
43  
44  
45  
46  
47  
48  
49  
50  
51  
52  
53  
54  
55  
56  
57  
58  
59  
60

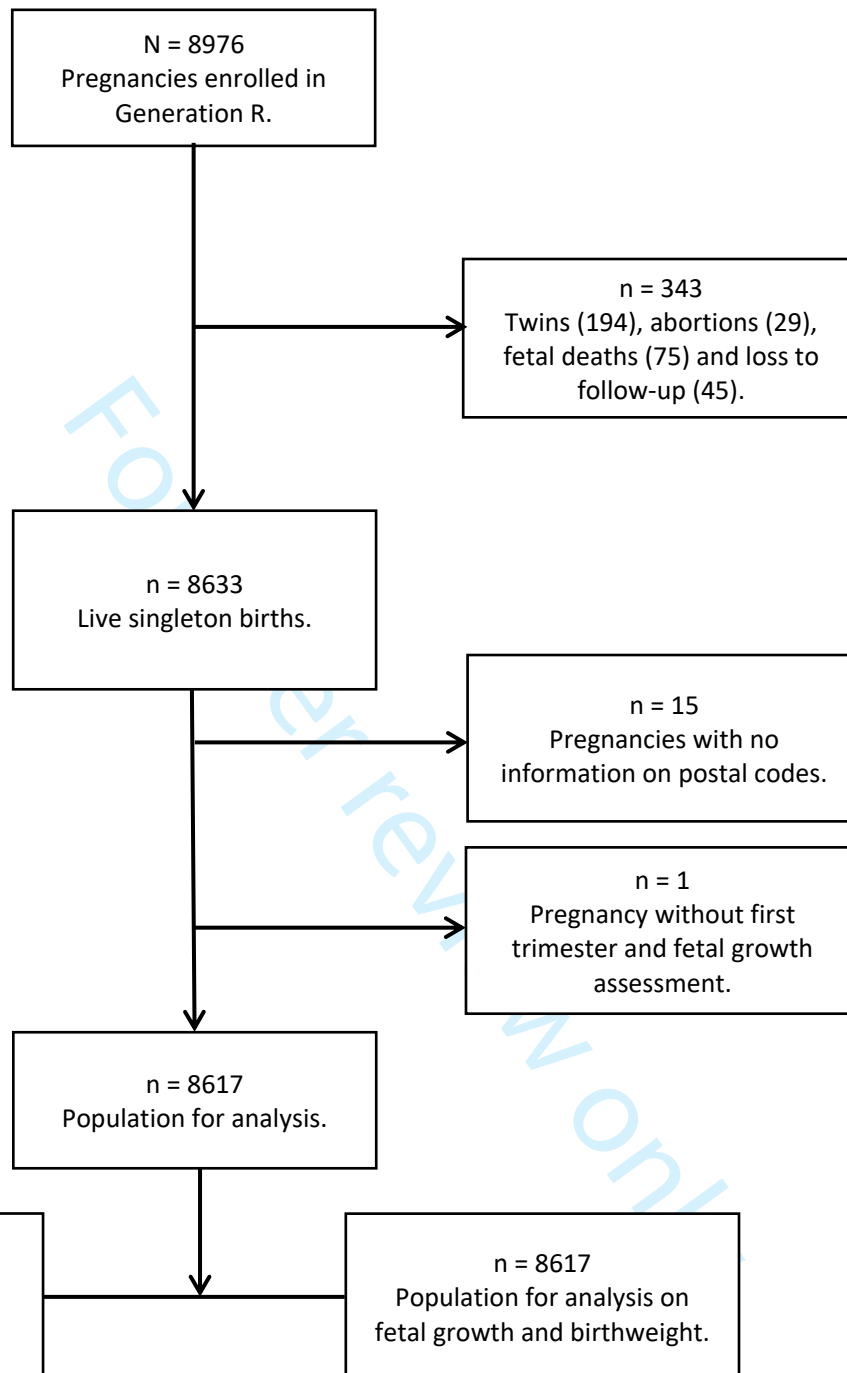

1  
2  
3  
4  
5  
6  
7  
8  
9  
10  
11  
12  
13  
14  
15  
16  
17  
18  
19  
20  
21  
22  
23  
24  
25  
26  
27  
28  
29  
30  
31  
32  
33  
34  
35  
36  
37  
38  
39  
40  
41  
42  
43  
44  
45  
46  
47  
48  
49  
50  
51  
52  
53  
54  
55  
56  
57  
58  
59  
60

For peer review only

**Figure 2. Associations of neighbourhood deprivation with fetal growth.**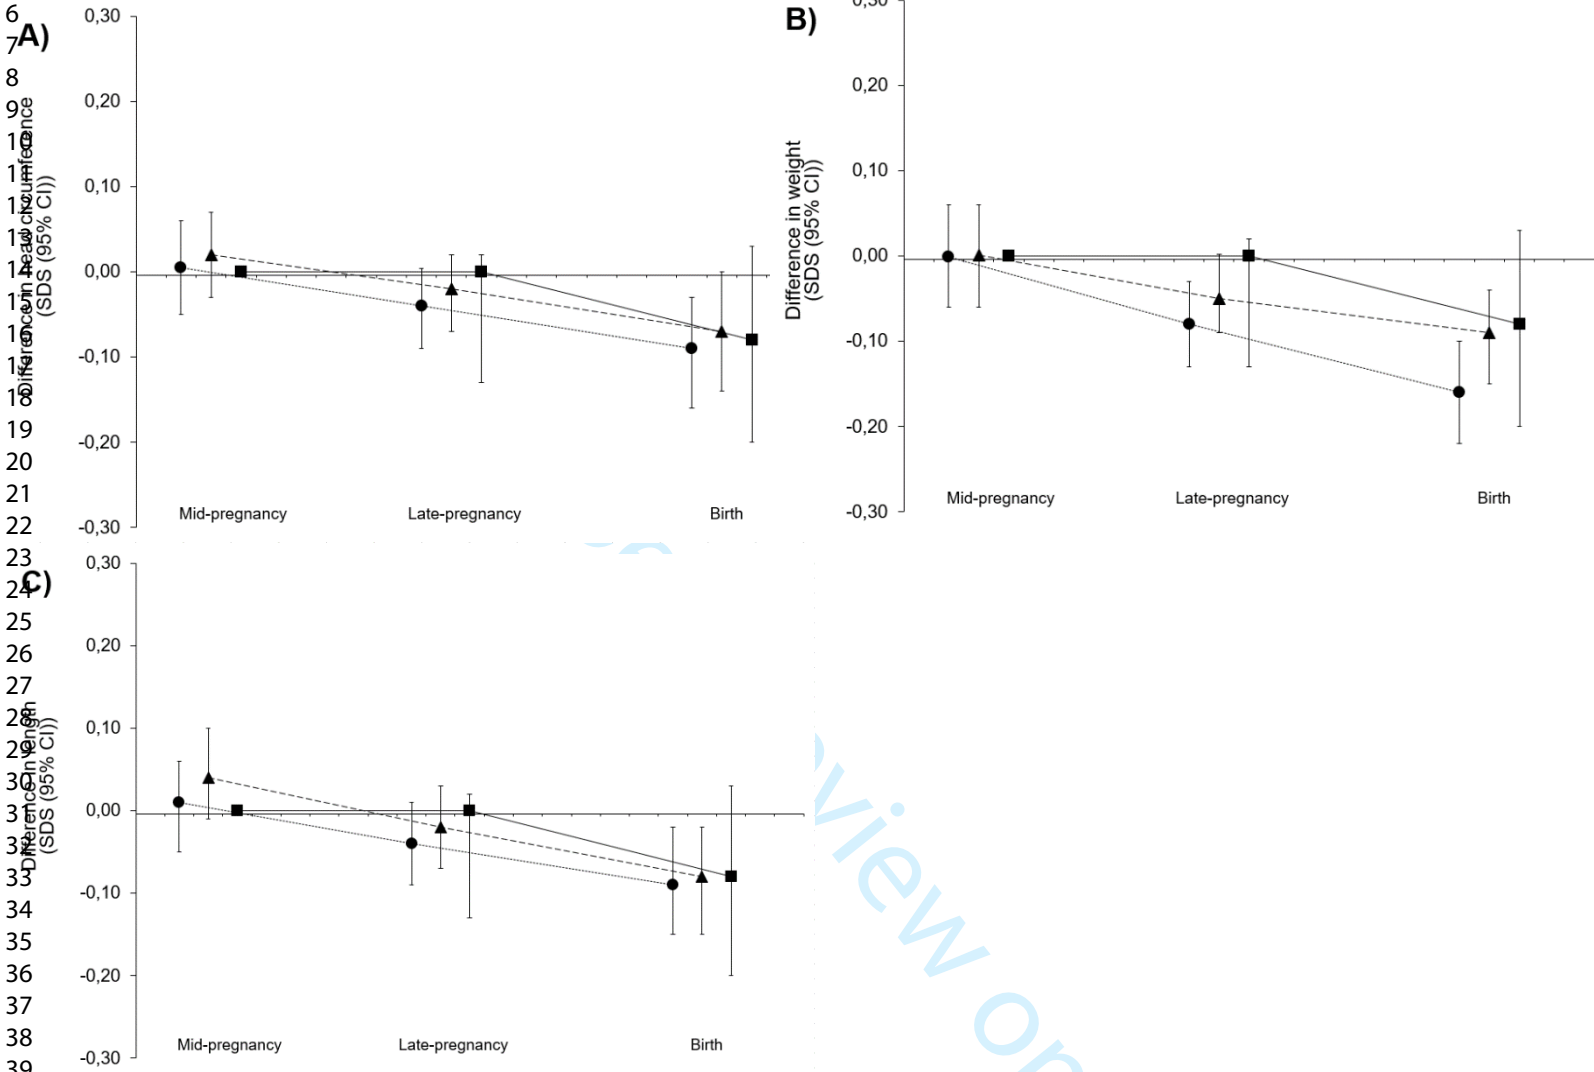

Differences in fetal growth rates for the lower three neighbourhood status score quartiles as compared to the highest neighbourhood status score. Squares represent the lowest quartile of the neighbourhood status score; circles represent the second quartile; and triangles the third quartile. Results are based on repeated measurement regression models and reflect the differences in gestational-age-adjusted SDS scores of (a) fetal head circumference, (b) weight, and (c) length growth for the three lower neighbourhood status score compared to the highest neighbourhood status score (reference group represented as zero line). The models were adjusted for maternal age, educational level, smoking, alcohol use, folic acid supplement use, ethnicity, parity, pre-pregnancy body mass index and fetal sex.

## 1 Supplemental data

## 2 Supplemental Table 1. Fetal growth and adverse pregnancy outcomes in the study population, stratified for quartiles of neighbourhood deprivation.

|                        | n    | Study population<br>n = 8617 | n    | Lowest deprivation<br>quartile<br>n = 2170 | n    | Second deprivation<br>quartile<br>n = 2208 | n    | Third deprivation<br>quartile<br>n = 2090 | n    | Highest deprivation<br>quartile<br>n = 2149 | p-value <sup>1</sup> | p-value <sup>2</sup> |
|------------------------|------|------------------------------|------|--------------------------------------------|------|--------------------------------------------|------|-------------------------------------------|------|---------------------------------------------|----------------------|----------------------|
| <b>Early pregnancy</b> |      |                              |      |                                            |      |                                            |      |                                           |      |                                             |                      |                      |
| CRL                    | 1614 | -0.05 (1.06)                 | 287  | 0.03 (1.05)                                | 362  | -0.01 (1.07)                               | 418  | -0.01 (0.95)                              | 547  | 0.07 (0.87)                                 | 0.81                 | 0.63                 |
| HC                     | 5646 | -0.27 (1.39)                 | 1359 | -0.04 (0.99)                               | 1440 | -0.04 (1.04)                               | 1361 | -0.04 (1.10)                              | 1486 | -0.09 (1.06)                                | 0.36                 | 0.20                 |
| FL                     | 4682 | 0.61 (0.88)                  | 1162 | -0.08 (0.99)                               | 1233 | -0.18 (1.00)                               | 1107 | -0.04 (0.98)                              | 1180 | -0.10 (1.00)                                | 0.18                 | 0.74                 |
| <b>Mid pregnancy</b>   |      |                              |      |                                            |      |                                            |      |                                           |      |                                             |                      |                      |
| HC                     | 8035 | -0.02 (1.02)                 | 1972 | -0.06 (1.03)                               | 2049 | -0.04 (1.05)                               | 1973 | -0.01 (1.02)                              | 2041 | 0.03 (0.98)                                 | <b>0.047</b>         | <b>0.01</b>          |
| FL                     | 8058 | 0.03 (1.03)                  | 1985 | 0.06 (1.07)                                | 2046 | 0.06 (1.08)                                | 1970 | 0.04 (1.02)                               | 2057 | -0.01 (0.97)                                | 0.12                 | <b>0.03</b>          |
| AC                     | 8052 | 0.01 (1.01)                  | 1977 | -0.04 (1.02)                               | 2050 | -0.04 (1.02)                               | 1971 | 0.02 (1.00)                               | 2054 | 0.11 (0.98)                                 | <b>&lt;0.001</b>     | <b>&lt;0.001</b>     |
| EFW                    | 8016 | -0.10 (1.01)                 | 1975 | -0.12 (1.02)                               | 2035 | -0.12 (1.04)                               | 1957 | -0.09 (1.00)                              | 2049 | -0.06 (0.97)                                | 0.22                 | 0.08                 |
| <b>Late pregnancy</b>  |      |                              |      |                                            |      |                                            |      |                                           |      |                                             |                      |                      |
| HC                     | 8163 | 0.01 (1.00)                  | 2029 | -0.08 (1.00)                               | 2067 | -0.09 (1.02)                               | 1984 | 0.06 (1.00)                               | 2083 | 0.17 (0.96)                                 | <b>&lt;0.001</b>     | <b>&lt;0.001</b>     |
| FL                     | 8234 | -0.01 (1.00)                 | 2049 | -0.04 (1.00)                               | 2083 | -0.01 (1.05)                               | 2005 | 0.004 (1.00)                              | 2097 | 0.02 (0.97)                                 | 0.28                 | 0.06                 |
| AC                     | 8212 | 0.01 (1.01)                  | 2042 | -0.10 (1.01)                               | 2076 | -0.07 (1.04)                               | 1995 | 0.04 (1.01)                               | 2099 | 0.14 (0.97)                                 | <b>&lt;0.001</b>     | <b>&lt;0.001</b>     |
| EFW                    | 8201 | 0.03 (1.02)                  | 2042 | -0.06 (1.01)                               | 2073 | -0.02 (1.04)                               | 1993 | 0.07 (1.00)                               | 2093 | 0.15 (1.00)                                 | <b>&lt;0.001</b>     | <b>&lt;0.001</b>     |

1  
2  
3  
4  
5  
6  
7  
8  
9  
10  
11  
12  
13  
14  
15  
16  
17  
18  
19  
20  
21  
22  
23  
24  
25  
26  
27  
28  
29  
30  
31  
32  
33  
34  
35  
36  
37  
38  
39  
40  
41  
42  
43  
44  
45  
46

**Birth**

|                           |     |            |     |             |     |             |     |            |     |            |                  |                  |
|---------------------------|-----|------------|-----|-------------|-----|-------------|-----|------------|-----|------------|------------------|------------------|
| Small for gestational age | 824 | 854 (9.9%) | 261 | 261 (12.2%) | 220 | 225 (10.1%) | 190 | 190 (9.2%) | 153 | 153 (7.1%) | <b>&lt;0.001</b> | <b>&lt;0.001</b> |
| Preterm birth             | 460 | 460 (5.3%) | 128 | 128 (5.9%)  | 142 | 142 (6.4%)  | 109 | 109 (5.2%) | 81  | 81 (3.8%)  | <b>0.001</b>     | <b>0.001</b>     |

---

3 Abbreviations: SD: standard deviation. HC: head circumference. FL: femur length. AC: abdominal circumference. EFW: estimated fetal weight. Values  
4 represent data in SD-score, mean (SD) or n (%).<sup>1</sup> Differences between groups were evaluated using one-way-ANOVA-tests for continuous variables and Chi-  
5 square tests for proportions. <sup>2</sup>Differences in growth parameters between the lowest and highest neighbourhood status score groups were tested were evaluated  
6 using Student’s t-tests. Percentages are valid percentages.

7

8 **Supplemental Table 2. Regression coefficients of longitudinal associations between quartiles of neighbourhood deprivation with fetal growth**  
 9 **patterns.**

|                                  | Intercept                   | Slope                          | Intercept                   | Slope                          | Intercept                    | Slope                          |
|----------------------------------|-----------------------------|--------------------------------|-----------------------------|--------------------------------|------------------------------|--------------------------------|
|                                  | Head circumference          | Head circumference             | Length                      | Length                         | Weight                       | Weight                         |
|                                  | (SDS)                       | (SDS)                          | (SDS)                       | (SDS)                          | (SDS)                        | (SDS)                          |
| <b>Neighbourhood deprivation</b> |                             |                                |                             |                                |                              |                                |
| <b>Quartile 1</b>                | <b>0.225 (0.122; 0.328)</b> | <b>-0.010 (-0.013; -0.006)</b> | <b>0.270 (0.167; 0.373)</b> | <b>-0.012 (-0.016; -0.010)</b> | <b>0.229 (0.115; 0.3441)</b> | <b>-0.011 (-0.015; -0.008)</b> |
| <b>Quartile 2</b>                | <b>0.104 (0.004; 0.204)</b> | <b>-0.005 (-0.008; -0.001)</b> | <b>0.103 (0.003; 0.203)</b> | <b>-0.005 (-0.008; -0.001)</b> | <b>0.155 (0.043; 0.268)</b>  | <b>-0.008 (-0.011; -0.005)</b> |
| <b>Quartile 3</b>                | <b>0.109 (0.009; 0.208)</b> | <b>-0.004 (-0.008; -0.001)</b> | <b>0.170 (0.071; 0.270)</b> | <b>-0.006 (-0.010; -0.003)</b> | <b>0.095 (-0.018; 0.208)</b> | <b>-0.005 (-0.008; -0.001)</b> |
| <b>Quartile 4</b>                | Ref.                        | Ref.                           | Ref.                        | Ref.                           | Ref.                         | Ref.                           |

10 Values are regression coefficients obtained from linear repeated measurement models and reflect the (gestational) age independent differences (intercepts) and  
 11 the gestational age dependent differences (slopes: change in growth characteristics SDS per week per quartile of the neighbourhood deprivation score,  
 12 compared with the highest quartile of the neighbourhood deprivation score as the reference group, adjusted for maternal age, educational level, smoking,  
 13 alcohol use, folic acid supplement use, ethnicity, parity, pre-pregnancy body mass index and fetal sex.)



14 **Supplemental Figure 1.** Associations between neighbourhood deprivation with first trimester and  
15 fetal growth measurements.

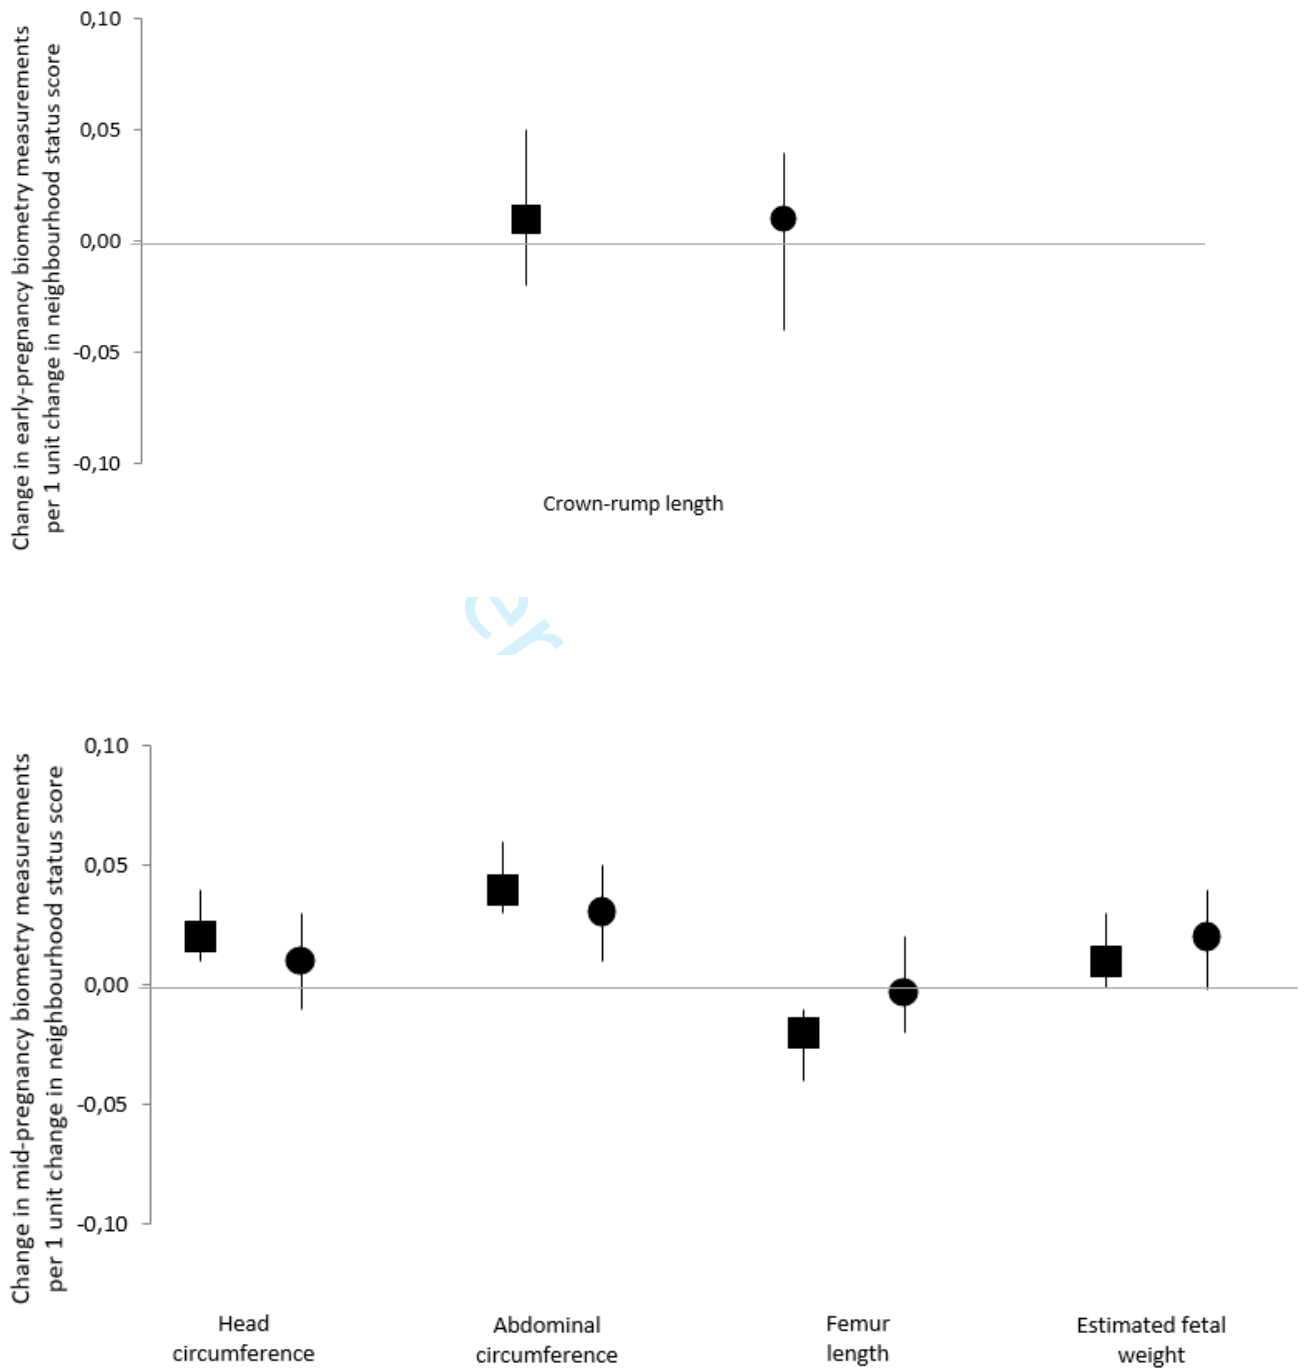

16

17

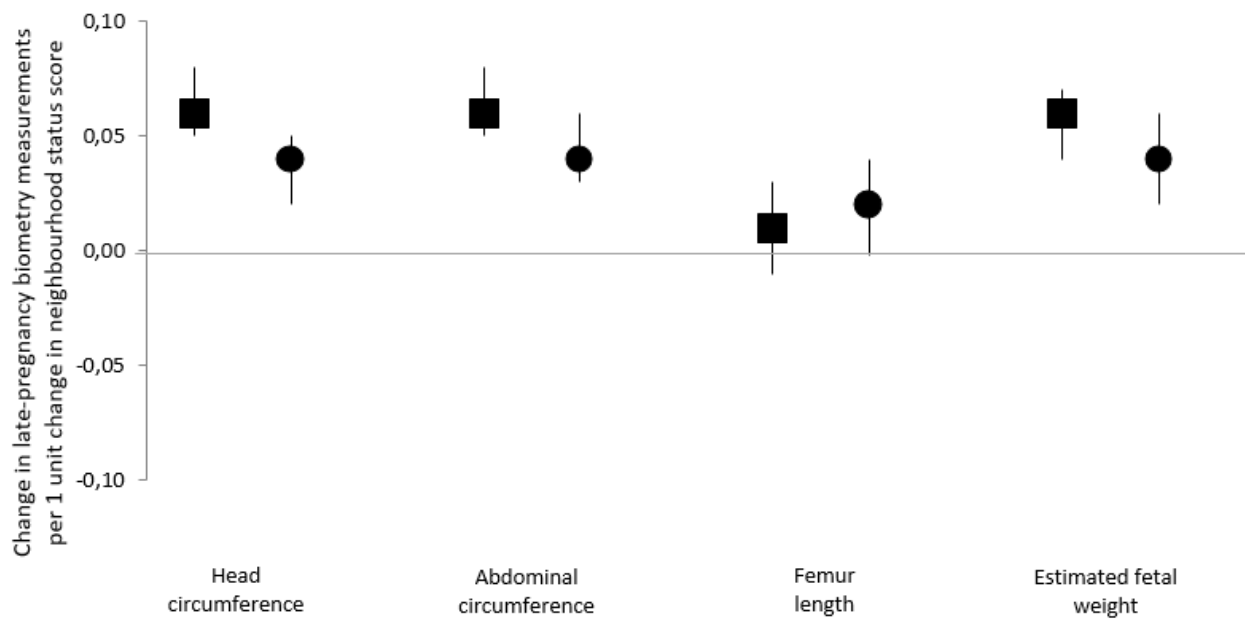

18

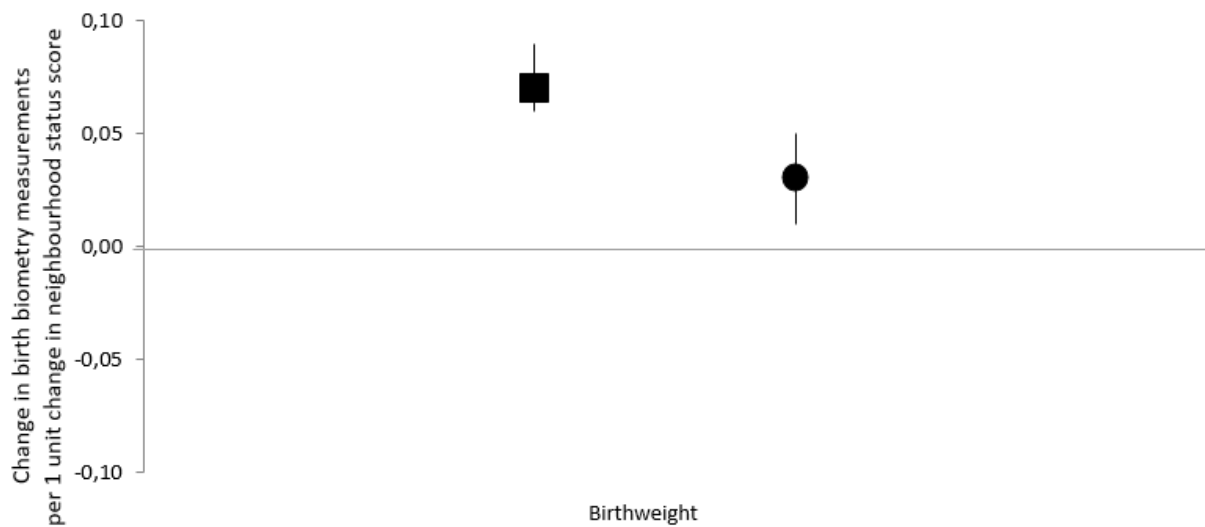

19 Data are SDS values (95% CI) from linear regression models that reflect the differences in growth  
 20 characteristics in SDS's in early pregnancy, mid-pregnancy late pregnancy and birth, per 1 unit change  
 21 in neighbourhood status score. Analyses with crown-rump length were based on subgroup analyses (n  
 22 = 1614). Estimates are from multiple imputed data. Squares show basic model; circles show the  
 23 adjusted model: basic model and additionally adjusted for maternal age, educational level, smoking,  
 24 alcohol use, folic acid supplement use, ethnicity, parity, pre-pregnancy body mass index and fetal sex.

25 **Supplemental Table 3.** P-value of interaction terms (neighbourhood deprivation \* parity and  
 26 neighbourhood deprivation \* complications in a previous pregnancy).

| <b>Study population</b> |                          |                                              |
|-------------------------|--------------------------|----------------------------------------------|
| <b>n = 8617</b>         |                          |                                              |
|                         | <b>Parity</b>            | <b>Complications in a previous pregnancy</b> |
|                         | <b>p-value for trend</b> | <b>p-value for trend</b>                     |
| <b>Early pregnancy</b>  |                          |                                              |
| CRL                     | 0.44                     | 0.36                                         |
| HC                      | 0.25                     | 0.24                                         |
| FL                      | 0.52                     | 0.91                                         |
| <b>Mid pregnancy</b>    |                          |                                              |
| HC                      | 0.15                     | 0.20                                         |
| FL                      | 0.13                     | 0.20                                         |
| AC                      | 0.73                     | 0.81                                         |
| EFW                     | 0.27                     | 0.34                                         |
| <b>Late pregnancy</b>   |                          |                                              |
| HC                      | 0.64                     | 0.62                                         |
| FL                      | 0.58                     | 0.51                                         |
| AC                      | 0.66                     | 0.88                                         |
| EFW                     | 0.82                     | 0.99                                         |
| <b>Birth</b>            |                          |                                              |
| SGA                     | 0.95                     | 0.85                                         |
| PTB                     | 0.17                     | <b>0.03</b>                                  |

27 Abbreviations:  $\beta$ : beta; CRL: crown-rump length; HC: head circumference; FL: femur length; AC:  
 28 abdominal circumference; EFW: estimated fetal weight. Values are based on the adjusted linear and  
 29 logistic regression models.

30 **Supplemental Table 4.** Associations between the neighbourhood status score and fetal growth and adverse pregnancy outcomes, split for nulliparous women,  
 31 multiparous women without a complications in a previous pregnancy or multiparous women with a complications in a previous pregnancy.

| Study population       | Nulliparous<br>n = 8617    |                   | Multiparous, no complications previous pregnancy<br>N = 3166 |                   | Multiparous, complications previous pregnancy<br>N = 606 |                   |
|------------------------|----------------------------|-------------------|--------------------------------------------------------------|-------------------|----------------------------------------------------------|-------------------|
|                        | Trend                      |                   | Trend                                                        |                   | Trend                                                    |                   |
|                        | $\beta$ /OR (95% CI)       | p-value for trend | $\beta$ /OR (95% CI)                                         | p-value for trend | $\beta$ /OR (95% CI)                                     | p-value for trend |
| <b>Early pregnancy</b> |                            |                   |                                                              |                   |                                                          |                   |
| CRL                    | 0.02 (-0.04 ; 0.08)        | 0.42              | -0.01 (-0.10 ; 0.07)                                         | 0.74              | 0.02 (-0.19 ; 0.22)                                      | 0.88              |
| HC                     | 0.004 (-0.03 ; 0.04)       | 0.84              | -0.01 (-0.05 ; 0.04)                                         | 0.73              | -0.04 (-0.15 ; 0.07)                                     | 0.45              |
| FL                     | 0.03 (-0.01 ; 0.07)        | 0.09              | 0.04 (-0.01 ; 0.09)                                          | 0.09              | -0.04 (-0.15 ; 0.07)                                     | 0.50              |
| <b>Mid pregnancy</b>   |                            |                   |                                                              |                   |                                                          |                   |
| HC                     | 0.02 (-0.02 ; 0.05)        | 0.32              | 0.02 (-0.02 ; 0.06)                                          | 0.30              | <b>-0.11 (-0.19 ; -0.03)</b>                             | <b>0.01</b>       |
| FL                     | 0.01 (-0.02 ; 0.04)        | 0.66              | -0.01 (-0.05 ; 0.03)                                         | 0.59              | -0.06 (-0.15 ; 0.02)                                     | 0.14              |
| AC                     | <b>0.03 (0.002 ; 0.06)</b> | <b>0.03</b>       | <b>0.05 (0.01 ; 0.09)</b>                                    | <b>0.01</b>       | -0.02 (-0.11 ; 0.07)                                     | 0.66              |
| EFW                    | 0.02 (-0.01 ; 0.05)        | 0.12              | 0.03 (-0.01 ; 0.07)                                          | 0.18              | -0.04 (-0.13 ; 0.04)                                     | 0.32              |
| <b>Late pregnancy</b>  |                            |                   |                                                              |                   |                                                          |                   |
| HC                     | <b>0.04 (0.01 ; 0.07)</b>  | <b>0.004</b>      | 0.03 (-0.003 ; 0.07)                                         | 0.07              | 0.03 (-0.05 ; 0.11)                                      | 0.50              |
| FL                     | 0.02 (-0.01 ; 0.05)        | 0.10              | -0.003 (-0.04 ; 0.03)                                        | 0.89              | 0.03 (-0.05 ; 0.11)                                      | 0.45              |

1  
2  
3  
4  
5  
6  
7  
8  
9  
10  
11  
12  
13  
14  
15  
16  
17  
18  
19  
20  
21  
22  
23  
24  
25  
26  
27  
28  
29  
30  
31  
32  
33  
34  
35  
36  
37  
38  
39  
40  
41  
42  
43  
44  
45  
46

|              |                            |             |                            |              |                     |      |
|--------------|----------------------------|-------------|----------------------------|--------------|---------------------|------|
| AC           | <b>0.03 (0.002 ; 0.06)</b> | <b>0.04</b> | <b>0.04 (0.01 ; 0.08)</b>  | <b>0.03</b>  | 0.07 (-0.01 ; 0.16) | 0.10 |
| EFW          | <b>0.03 (0.01 ; 0.06)</b>  | <b>0.02</b> | <b>0.04 (0.001 ; 0.08)</b> | <b>0.048</b> | 0.07 (-0.02 ; 0.16) | 0.11 |
| <b>Birth</b> |                            |             |                            |              |                     |      |
| SGA          | <b>0.90 (0.82 ; 0.99)</b>  | <b>0.03</b> | 0.96 (0.82 ; 1.12)         | 0.60         | 0.88 (0.63 ; 1.23)  | 0.46 |
| PTB          | 0.91 (0.81 ; 1.03)         | 0.15        | <b>0.73 (0.58 ; 0.93)</b>  | <b>0.01</b>  | 0.89 (0.66 ; 1.21)  | 0.46 |

32 Abbreviations:  $\beta$ : beta; CRL: crown-rump length; HC: head circumference; FL: femur length; AC: abdominal circumference; EFW: estimated fetal weight.

33 Values are regression coefficients with the 95% CI of the data in SD-score and are based on adjusted linear and logistic regression models. Adjusted model:

34 adjusted for maternal age, educational level, smoking, alcohol use, folic acid supplement use, ethnicity, parity, pre-pregnancy body mass index and fetal sex.

35 p-for trend analysis with the neighbourhood deprivation as a continuous measure.

36 **Supplemental Figure 2.** Multilevel regression analysis of associations between the neighbourhood  
 37 deprivation and first trimester and fetal growth measurements.

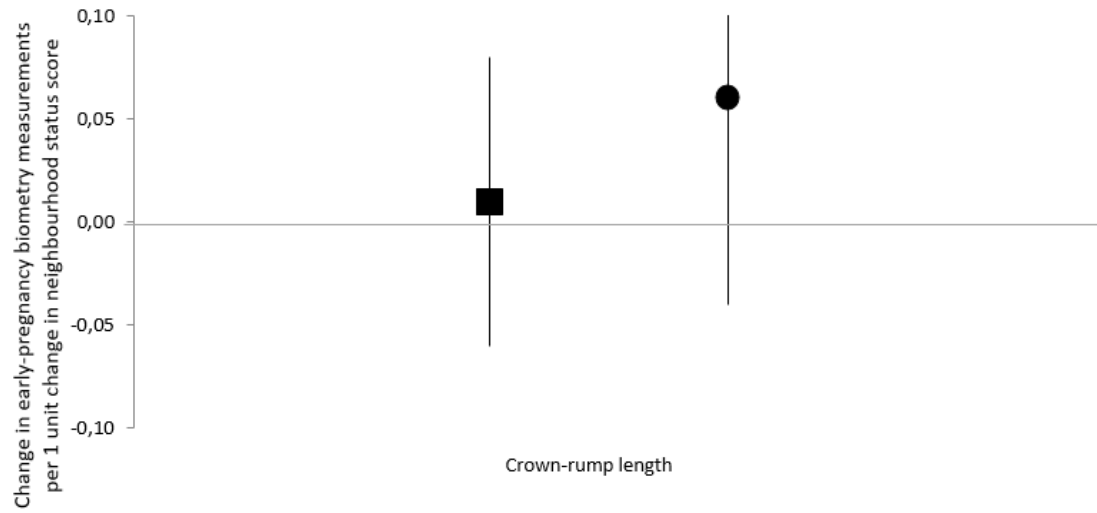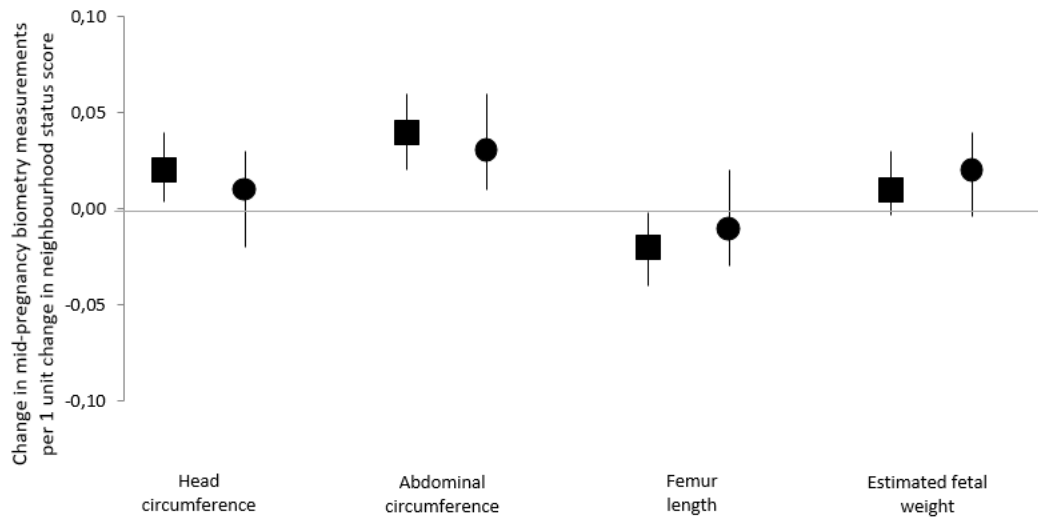

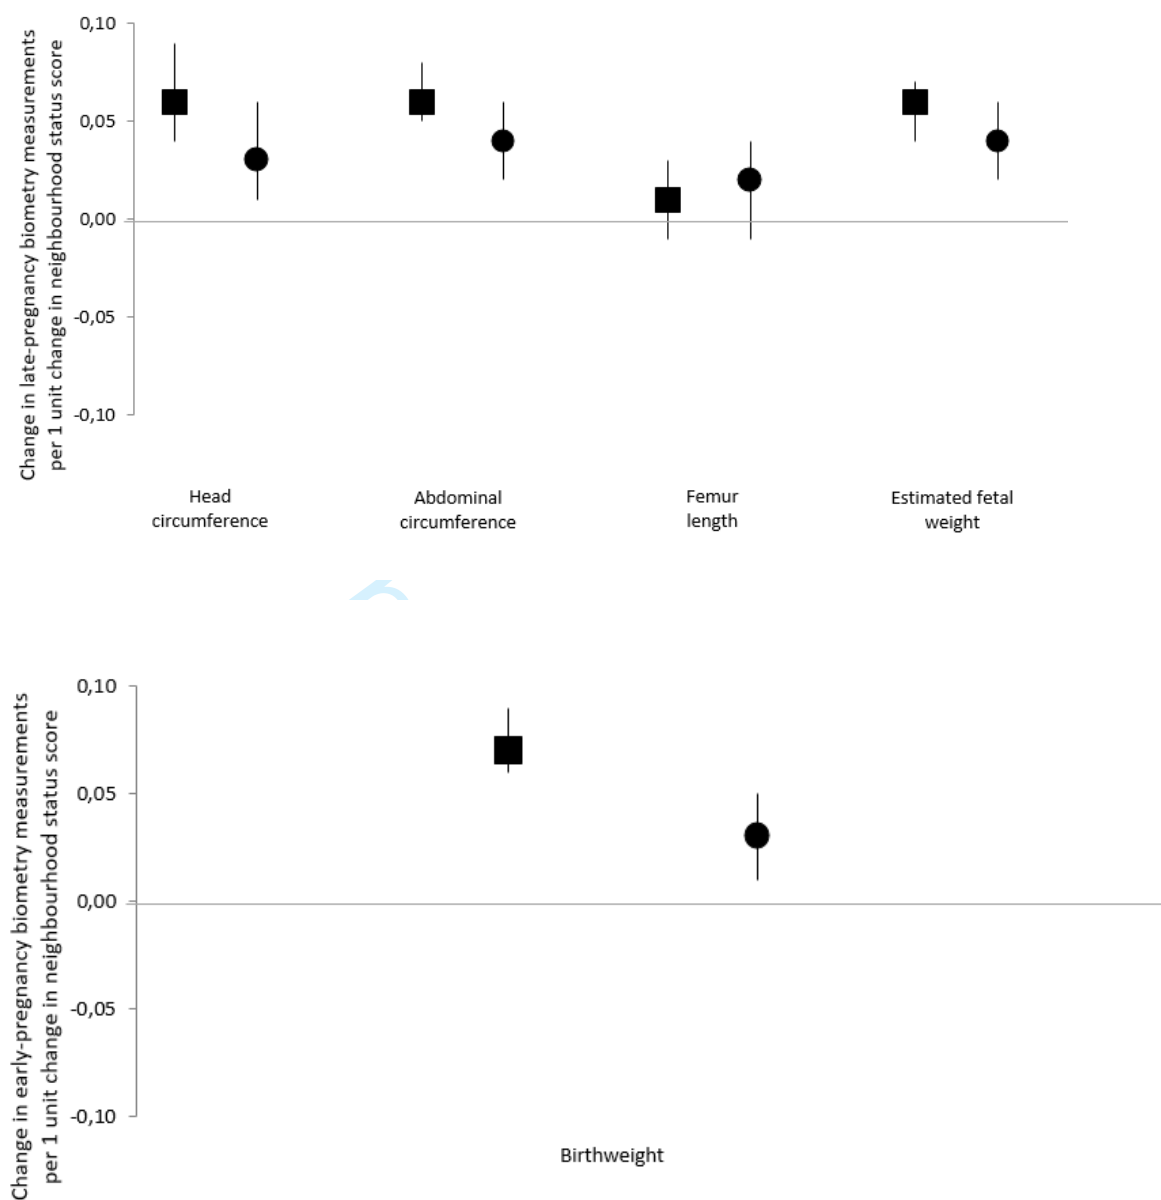

65 Data are SDS values (95% CI) from multilevel analyses and reflect the differences in growth  
 66 characteristics in SDS's in early pregnancy, mid-pregnancy late pregnancy and birth, per 1 unit change  
 67 in neighbourhood status score. Analyses with crown-rump length were based on subgroup analyses (n  
 68 = 1614). Estimates are from multiple imputed data. Squares show basic model. Circles show adjusted  
 69 model: basic model and additionally adjusted for maternal age, educational level, smoking, alcohol  
 70 use, folic acid supplement use, ethnicity, parity, pre-pregnancy body mass index and fetal sex.

71 **Supplemental Table 5.** Sensitivity analysis with all available CRL measurements in the study population.

72 **a. All CRL measurement in the study population, stratified for quartiles of the neighbourhood status score.**

|     | n    | Study population<br>n = 8617 | n   | Lowest deprivation quartile<br>n = 2277 | n   | Second deprivation quartile<br>n = 2123 | n   | Third deprivation quartile<br>n = 2084 | n   | Highest deprivation quartile<br>n = 2133 | p-value <sup>1</sup> | Mean difference (95% CI) <sup>2</sup> | p-value <sup>2</sup> |
|-----|------|------------------------------|-----|-----------------------------------------|-----|-----------------------------------------|-----|----------------------------------------|-----|------------------------------------------|----------------------|---------------------------------------|----------------------|
| CRL | 1614 |                              | 287 | 0.03 (1.05)                             | 362 | -0.01 (1.07)                            | 418 | -0.01 (0.95)                           | 547 | 0.07 (0.87)                              | 0.56                 | -0.03 (-0.17 ; 0.10)                  | 0.61                 |

73

74

75

76

77 **b. All CRL measurement in the study population and the associations between quartiles of the neighbourhood status score.**

|     | n    | Model    | Lowest deprivation quartile<br>n = 300 | Second deprivation quartile<br>n = 373 | Third deprivation quartile<br>n = 399 | Highest deprivation quartile<br>n = 542 | Trend                | p-value for trend |
|-----|------|----------|----------------------------------------|----------------------------------------|---------------------------------------|-----------------------------------------|----------------------|-------------------|
|     |      |          | $\beta$ (95% CI)                       | $\beta$ (95% CI)                       | $\beta$ (95% CI)                      | $\beta$ (95% CI)                        | $\beta$ (95% CI)     |                   |
| CRL | 1614 | Basic    | -0.03 (-0.17 ; 0.10)                   | -0.08 (-0.21 ; 0.05)                   | -0.08 (-0.20 ; 0.05)                  | Reference                               | 0.01 (-0.02 ; 0.05)  | 0.48              |
|     |      | Adjusted | 0.02 (-0.15 ; 0.16)                    | -0.04 (-0.17 ; 0.10)                   | -0.06 (-0.19 ; 0.06)                  | Reference                               | 0.004 (-0.04 ; 0.04) | 0.85              |

78

79



80 c. All CRL measurement in the study population and the associations between quartiles of the neighbourhood status score. Complete case analysis.

|     | n    | Model    | Lowest deprivation quartile<br>n = 2268 | Second deprivation quartile<br>n = 2118 | Third deprivation quartile<br>n = 2081 | Highest deprivation quartile<br>n = 2131 | Trend               | p-value for trend |
|-----|------|----------|-----------------------------------------|-----------------------------------------|----------------------------------------|------------------------------------------|---------------------|-------------------|
|     |      |          | $\beta$ (95% CI)                        | $\beta$ (95% CI)                        | $\beta$ (95% CI)                       |                                          | $\beta$ (95% CI)    |                   |
| CRL | 1143 | Adjusted | -0.06 (-0.23 ; 0.12)                    | 0.02 (-0.14 ; 0.17)                     | -0.06 (-0.21 ; 0.09)                   | Reference                                | 0.01 (-0.04 ; 0.05) | 0.80              |

81

82

83 d. The association between the neighbourhood deprivation status score and all CRL measurement in the study population in a selected cohort of non-SGA pregnancies.  
84

|     | n   | Model    | Lowest deprivation quartile<br>n = 2268 | Second deprivation quartile<br>n = 2118 | Third deprivation quartile<br>n = 2081 | Highest deprivation quartile<br>n = 2131 | Trend                | p-value for trend |
|-----|-----|----------|-----------------------------------------|-----------------------------------------|----------------------------------------|------------------------------------------|----------------------|-------------------|
|     |     |          | $\beta$ (95% CI)                        | $\beta$ (95% CI)                        | $\beta$ (95% CI)                       |                                          | $\beta$ (95% CI)     |                   |
| CRL | 434 | Basic    | 0.05 (-0.26 ; 0.35)                     | 0.10 (-0.17 ; 0.37)                     | -0.05 (-0.31 ; 0.21)                   | Reference                                | -0.01 (-0.09 ; 0.06) | 0.73              |
|     |     | Adjusted | 0.07 (-0.30 ; 0.43)                     | 0.09 (-0.19 ; 0.38)                     | -0.06 (-0.33 ; 0.21)                   | Reference                                | -0.02 (-0.11 ; 0.08) | 0.75              |

85 Abbreviations:  $\beta$ : beta; CRL: crown-rump length. Values are regression coefficients with the 95% CI of the data in SD-score and are based on linear  
86 regression models. Basic model: by the use of SD scores it is automatically adjusted for gestational age. Fully adjusted model: basic model and additionally  
87 adjusted for maternal age, educational level, smoking, alcohol use, folic acid supplement use, ethnicity, parity, pre-pregnancy body mass index and fetal sex.  
88 p-for trend analysis with the neighbourhood deprivation as a continuous measure. <sup>1</sup>Differences between groups were evaluated using one-way-ANOVA-tests  
89 for continuous variables. <sup>2</sup>Differences in growth parameters between the lowest and highest neighbourhood status score groups were tested were evaluated  
90 using Student’s t-tests.

91 **Supplemental Table 6.** Associations between the neighbourhood status score and fetal growth in a selected cohort of non-SGA pregnancies.

| Study population<br>n = 7710 | Model    | Lowest deprivation<br>quartile<br>n = 2268 | Second deprivation<br>quartile<br>n = 2118 | Third deprivation<br>quartile<br>n = 2081 | Highest deprivation<br>quartile<br>n = 2131 | Trend                        |                   |
|------------------------------|----------|--------------------------------------------|--------------------------------------------|-------------------------------------------|---------------------------------------------|------------------------------|-------------------|
|                              |          | $\beta$ (95% CI)                           | $\beta$ (95% CI)                           | $\beta$ (95% CI)                          |                                             | $\beta$ (95% CI)             | p-value for trend |
| <b>Early pregnancy</b>       |          |                                            |                                            |                                           |                                             |                              |                   |
| CRL                          | Basic    | 0.05 (-0.26 ; 0.35)                        | 0.10 (-0.17 ; 0.37)                        | -0.05 (-0.31 ; 0.21)                      | <i>Reference</i>                            | -0.01 (-0.09 ; 0.06)         | 0.73              |
|                              | Adjusted | 0.07 (-0.30 ; 0.43)                        | 0.09 (-0.19 ; 0.38)                        | -0.06 (-0.33 ; 0.21)                      | <i>Reference</i>                            | -0.02 (-0.11 ; 0.08)         | 0.75              |
| HC                           | Basic    | <b>-0.38 (-0.71 ; -0.04)</b>               | <b>-0.37 (-0.69 ; -0.06)</b>               | -0.07 (-0.37 ; 0.23)                      | <i>Reference</i>                            | <b>0.12 (0.04 ; 0.21)</b>    | <b>0.004</b>      |
|                              | Adjusted | -0.22 (-0.60 ; 0.17)                       | -0.32 (-0.65 ; 0.01)                       | -0.06 (-0.36 ; 0.25)                      | <i>Reference</i>                            | 0.09 (-0.01 ; 0.19)          | 0.09              |
| FL                           | Basic    | -0.19 (-0.53 ; 0.15)                       | <b>-0.33 (-0.63 ; -0.03)</b>               | -0.11 (-0.40 ; 0.18)                      | <i>Reference</i>                            | 0.08 (-0.002 ; 0.16)         | 0.06              |
|                              | Adjusted | -0.24 (-0.66 ; 0.18)                       | <b>-0.36 (-0.69 ; -0.03)</b>               | -0.13 (-0.44 ; 0.18)                      | <i>Reference</i>                            | 0.10 (-0.01 ; 0.20)          | 0.07              |
| <b>Mid pregnancy</b>         |          |                                            |                                            |                                           |                                             |                              |                   |
| HC                           | Basic    | <b>-0.07 (-0.13 ; -0.001)</b>              | -0.05 (-0.12 ; 0.01)                       | -0.03 (-0.10 ; 0.04)                      | <i>Reference</i>                            | <b>0.02 (0.003 ; 0.04)</b>   | <b>0.02</b>       |
|                              | Adjusted | -0.02 (-0.10 ; 0.05)                       | -0.03 (-0.09 ; 0.04)                       | -0.02 (-0.09 ; 0.05)                      | <i>Reference</i>                            | 0.01 (-0.01 ; 0.03)          | 0.40              |
| FL                           | Basic    | <b>0.10 (0.045 ; 0.17)</b>                 | <b>0.10 (0.03 ; 0.16)</b>                  | <b>0.08 (0.01 ; 0.15)</b>                 | <i>Reference</i>                            | <b>-0.02 (-0.05 ; -0.01)</b> | <b>0.001</b>      |
|                              | Adjusted | 0.02 (-0.05 ; 0.10)                        | 0.05 (-0.03 ; 0.11)                        | 0.04 (-0.03 ; 0.11)                       | <i>Reference</i>                            | -0.01 (-0.03 ; 0.01)         | 0.42              |
| AC                           | Basic    | <b>-0.12 (-0.18 ; -0.05)</b>               | <b>-0.13 (-0.20 ; -0.07)</b>               | <b>-0.07 (-0.13 ; -0.01)</b>              | <i>Reference</i>                            | <b>0.04 (0.02 ; 0.05)</b>    | <b>&lt;0.001</b>  |

1  
2  
3  
4  
5  
6  
7  
8  
9  
10  
11  
12  
13  
14  
15  
16  
17  
18  
19  
20  
21  
22  
23  
24  
25  
26  
27  
28  
29  
30  
31  
32  
33  
34  
35  
36  
37  
38  
39  
40  
41  
42  
43  
44  
45  
46

|                       |          |                              |                              |                               |                  |                           |                  |
|-----------------------|----------|------------------------------|------------------------------|-------------------------------|------------------|---------------------------|------------------|
|                       | Adjusted | <b>-0.09 (-0.16 ; -0.01)</b> | <b>-0.11 (-0.18 ; -0.04)</b> | -0.06 (-0.12 ; 0.01)          | <i>Reference</i> | <b>0.03 (0.01 ; 0.05)</b> | <b>0.01</b>      |
| EFW                   | Basic    | -0.03 (-0.08 ; 0.05)         | -0.03 (-0.09 ; 0.04)         | 0.001 (-0.07 ; 0.06)          | <i>Reference</i> | 0.01 (-0.01 ; 0.02)       | 0.77             |
|                       | Adjusted | -0.04 (-0.12 ; 0.03)         | -0.04 (-0.11 ; 0.03)         | -0.01 (-0.08 ; 0.05)          | <i>Reference</i> | 0.01 (-0.01 ; 0.03)       | 0.19             |
| <hr/>                 |          |                              |                              |                               |                  |                           |                  |
| <b>Late pregnancy</b> |          |                              |                              |                               |                  |                           |                  |
| HC                    | Basic    | <b>-0.22 (-0.29 ; -0.16)</b> | <b>-0.24 (-0.31 ; -0.18)</b> | <b>-0.09 (-0.16 ; -0.03)</b>  | <i>Reference</i> | <b>0.06 (0.04 ; 0.08)</b> | <b>&lt;0.001</b> |
|                       | Adjusted | <b>-0.13 (-0.20 ; -0.06)</b> | <b>-0.18 (-0.24 ; -0.11)</b> | <b>-0.06 (-0.12 ; -0.001)</b> | <i>Reference</i> | <b>0.03 (0.01 ; 0.05)</b> | <b>&lt;0.001</b> |
| FL                    | Basic    | -0.02 (-0.09 ; 0.04)         | 0.01 (-0.05 ; 0.07)          | 0.01 (-0.05 ; 0.08)           | <i>Reference</i> | 0.001 (-0.02 ; 0.02)      | 0.90             |
|                       | Adjusted | <b>-0.08 (-0.15 ; -0.01)</b> | -0.01 (-0.08 ; 0.05)         | -0.01 (-0.07 ; 0.06)          | <i>Reference</i> | 0.01 (-0.01 ; 0.03)       | 0.20             |
| AC                    | Basic    | <b>-0.20 (-0.27 ; -0.14)</b> | <b>-0.18 (-0.24 ; -0.12)</b> | <b>-0.07 (-0.13 ; -0.01)</b>  | <i>Reference</i> | <b>0.06 (0.04 ; 0.07)</b> | <b>&lt;0.001</b> |
|                       | Adjusted | <b>-0.15 (-0.22 ; -0.08)</b> | <b>-0.13 (-0.19 ; -0.06)</b> | -0.05 (-0.12 ; 0.01)          | <i>Reference</i> | <b>0.04 (0.02 ; 0.06)</b> | <b>0.02</b>      |
| EFW                   | Basic    | <b>-0.18 (-0.20 ; -0.12)</b> | <b>-0.14 (-0.20 ; -0.08)</b> | -0.05 (-0.11 ; 0.01)          | <i>Reference</i> | <b>0.05 (0.03 ; 0.06)</b> | <b>&lt;0.001</b> |
|                       | Adjusted | <b>-0.16 (-0.23 ; -0.08)</b> | <b>-0.11 (-0.17 ; -0.04)</b> | -0.05 (-0.11 ; 0.02)          | <i>Reference</i> | <b>0.04 (0.02 ; 0.06)</b> | <b>&lt;0.001</b> |

92 Abbreviations: SGA: small for gestational age, HC: head circumference, FL: femur length, AC: abdominal circumference, EFW: estimated fetal weight.  
 93 Values are regression coefficients with the 95% CI of the data in SD-score and are based on linear regression models. Basic model: by the use of SD scores it  
 94 is automatically adjusted for gestational age. Fully adjusted model: basic model and additionally adjusted for maternal age, educational level, smoking, alcohol  
 95 use, folic acid supplement use, ethnicity, parity, pre-pregnancy body mass index and fetal sex. p-for trend analysis with the neighbourhood deprivation as a  
 96 continuous measure.

97 **Supplemental Table 7.** Associations between the neighbourhood status score and foetal growth, additionally adjusted for household income.

| Study population       | n    | Model    | Lowest SES quartile<br>n = 2170 | Second SES quartile<br>n = 2208 | Third SES quartile<br>n = 2090 | Highest SES quartile<br>n = 2149 | Trend                        | p-value for trend |
|------------------------|------|----------|---------------------------------|---------------------------------|--------------------------------|----------------------------------|------------------------------|-------------------|
|                        |      |          | $\beta$ (95% CI)                | $\beta$ (95% CI)                | $\beta$ (95% CI)               | $\beta$ (95% CI)                 | $\beta$ (95% CI)             |                   |
| <b>Early pregnancy</b> |      |          |                                 |                                 |                                |                                  |                              |                   |
| CRL                    | 1614 | Basic    | -0.03 (-0.17 ; 0.10)            | -0.08 (-0.21 ; 0.05)            | -0.08 (-0.20 ; 0.05)           | <i>Reference</i>                 | 0.01 (-0.02 ; 0.05)          | 0.48              |
|                        |      | Adjusted | 0.002 (-0.15 ; 0.16)            | -0.04 (-0.17 ; 0.10)            | -0.06 (-0.19 ; 0.06)           | <i>Reference</i>                 | 0.02 (-0.02 ; 0.07)          | 0.30              |
| HC                     | 5646 | Basic    | 0.05 (-0.03 ; 0.13)             | 0.05 (-0.03 ; 0.13)             | 0.05 (-0.02 ; 0.13)            | <i>Reference</i>                 | -0.01 (-0.03 ; 0.01)         | 0.44              |
|                        |      | Adjusted | 0.02 (-0.06 ; 0.11)             | 0.04 (-0.04 ; 0.12)             | 0.05 (-0.03 ; 0.13)            | <i>Reference</i>                 | 0.004 (-0.02 ; 0.03)         | 0.75              |
| FL                     | 4682 | Basic    | 0.01 (-0.07 ; 0.09)             | <b>-0.09 (-0.17 ; -0.01)</b>    | 0.06 (-0.02 ; 0.14)            | <i>Reference</i>                 | 0.01 (-0.01 ; 0.03)          | 0.44              |
|                        |      | Adjusted | -0.09 (-0.18 ; 0.003)           | <b>-0.16 (-0.24 ; -0.07)</b>    | 0.01 (-0.06 ; 0.10)            | <i>Reference</i>                 | <b>0.03 (0.002; 0.06)</b>    | <b>0.04</b>       |
| <b>Mid pregnancy</b>   |      |          |                                 |                                 |                                |                                  |                              |                   |
| HC                     | 8035 | Basic    | <b>-0.08 (-0.15 ; -0.02)</b>    | <b>-0.07 (-0.13 ; -0.01)</b>    | -0.04 (-0.10 ; 0.03)           | <i>Reference</i>                 | <b>0.02 (0.01 ; 0.04)</b>    | <b>0.01</b>       |
|                        |      | Adjusted | -0.02 (-0.09 ; 0.05)            | -0.03 (-0.10 ; 0.03)            | -0.02 (-0.08 ; 0.04)           | <i>Reference</i>                 | 0.02 (-0.01 ; 0.04)          | 0.18              |
| FL                     | 8058 | Basic    | <b>0.07 (0.01 ; 0.14)</b>       | <b>0.06 (0.001 ; 0.13)</b>      | 0.05 (-0.01 ; 0.12)            | <i>Reference</i>                 | <b>-0.02 (-0.04 ; -0.01)</b> | <b>0.01</b>       |
|                        |      | Adjusted | -0.01 (-0.08 ; 0.07)            | 0.02 (-0.05 ; 0.09)             | 0.02 (-0.05 ; 0.08)            | <i>Reference</i>                 | 0.003 (-0.02 ; 0.02)         | 0.80              |

1  
2  
3  
4  
5  
6  
7  
8  
9  
10  
11  
12  
13  
14  
15  
16  
17  
18  
19  
20  
21  
22  
23  
24  
25  
26  
27  
28  
29  
30  
31  
32  
33

|                       |      |          |                              |                              |                              |                  |                           |                  |  |
|-----------------------|------|----------|------------------------------|------------------------------|------------------------------|------------------|---------------------------|------------------|--|
| AC                    | 8052 | Basic    | <b>-0.15 (-0.21 ; -0.09)</b> | <b>-0.15 (-0.21 ; -0.09)</b> | <b>-0.09 (-0.15 ; -0.03)</b> | <i>Reference</i> | <b>0.04 (0.03 ; 0.06)</b> | <b>&lt;0.001</b> |  |
|                       |      | Adjusted | <b>-0.10 (-0.17 ; -0.03)</b> | <b>-0.11 (-0.18 ; -0.05)</b> | <b>-0.07 (-0.13 ; -0.01)</b> | <i>Reference</i> | <b>0.03 (0.01 ; 0.05)</b> | <b>0.01</b>      |  |
| EFW                   | 8016 | Basic    | -0.06 (-0.12 ; 0.01)         | -0.06 (-0.12 ; 0.003)        | -0.03 (-0.09 ; 0.03)         | <i>Reference</i> | 0.01 (-0.001 ; 0.03)      | 0.08             |  |
|                       |      | Adjusted | -0.06 (-0.14 ; 0.01)         | -0.06 (-0.13 ; 0.01)         | -0.03 (-0.10 ; 0.03)         | <i>Reference</i> | 0.02 (-0.003 ; 0.04)      | 0.09             |  |
| <b>Late pregnancy</b> |      |          |                              |                              |                              |                  |                           |                  |  |
| HC                    | 8163 | Basic    | <b>-0.24 (-0.31 ; -0.18)</b> | <b>-0.25 (-0.31 ; -0.19)</b> | <b>-0.11 (-0.17 ; -0.05)</b> | <i>Reference</i> | <b>0.06 (0.05 ; 0.08)</b> | <b>&lt;0.001</b> |  |
|                       |      | Adjusted | <b>-0.14 (-0.21 ; -0.08)</b> | <b>-0.17 (-0.24 ; -0.11)</b> | <b>-0.07 (-0.14 ; -0.01)</b> | <i>Reference</i> | <b>0.04 (0.02 ; 0.06)</b> | <b>0.001</b>     |  |
| FL                    | 8234 | Basic    | -0.06 (-0.12 ; 0.003)        | -0.03 (-0.09 ; 0.03)         | -0.02 (-0.08 ; 0.05)         | <i>Reference</i> | 0.01 (-0.01 ; 0.03)       | 0.21             |  |
|                       |      | Adjusted | <b>-0.10 (-0.17 ; -0.02)</b> | -0.04 (-0.10 ; 0.03)         | -0.03 (-0.09 ; 0.04)         | <i>Reference</i> | 0.02 (-0.01 ; 0.04)       | 0.16             |  |
| AC                    | 8212 | Basic    | <b>-0.24 (-0.30 ; -0.18)</b> | <b>-0.21 (-0.27 ; -0.15)</b> | <b>-0.10 (-0.16 ; -0.04)</b> | <i>Reference</i> | <b>0.06 (0.05 ; 0.08)</b> | <b>&lt;0.001</b> |  |
|                       |      | Adjusted | <b>-0.16 (-0.23 ; -0.09)</b> | <b>-0.13 (-0.20 ; -0.07)</b> | <b>-0.07 (-0.13 ; -0.01)</b> | <i>Reference</i> | <b>0.03 (0.01 ; 0.05)</b> | <b>0.002</b>     |  |
| EFW                   | 8201 | Basic    | <b>-0.22 (-0.28 ; -0.16)</b> | <b>-0.18 (-0.24 ; -0.11)</b> | <b>-0.09 (-0.15 ; -0.02)</b> | <i>Reference</i> | <b>0.06 (0.04 ; 0.07)</b> | <b>&lt;0.001</b> |  |
|                       |      | Adjusted | <b>-0.17 (-0.25 ; -0.10)</b> | <b>-0.12 (-0.19 ; -0.06)</b> | <b>-0.07 (-0.13 ; -0.01)</b> | <i>Reference</i> | <b>0.03 (0.01 ; 0.06)</b> | <b>0.001</b>     |  |

98 Abbreviations: HC: head circumference, FL: femur length, AC: abdominal circumference, EFW: estimated fetal weight. Values are regression coefficients  
 99 with the 95% CI of the data in SD-score and are based on linear regression models. Basic model: by the use of SD scores it is automatically adjusted for  
 100 gestational age. Fully adjusted model: basic model and additionally adjusted for maternal age, educational level, smoking, alcohol use, folic acid supplement

44  
45  
46

1  
2  
3 101 use, ethnicity, parity, pre-pregnancy body mass index, fetal sex and household income. p-for trend analysis with the neighbourhood deprivation as a  
4  
5 102 continuous measure.  
6  
7  
8  
9  
10  
11  
12  
13  
14  
15  
16  
17  
18  
19  
20  
21  
22  
23  
24  
25  
26  
27  
28  
29  
30  
31  
32  
33  
34  
35  
36  
37  
38  
39  
40  
41  
42  
43  
44  
45  
46

For peer review only

103 **Supplemental Table 8.** Associations between the neighbourhood status score and foetal growth, adjusted for different classification of ethnicity.

| Study population       | n    | Model    | Lowest SES quartile<br>n = 2170 | Second SES quartile<br>n = 2208 | Third SES quartile<br>n = 2090 | Highest SES quartile<br>n = 2149 | Trend                        | p-value for trend |
|------------------------|------|----------|---------------------------------|---------------------------------|--------------------------------|----------------------------------|------------------------------|-------------------|
|                        |      |          | $\beta$ (95% CI)                | $\beta$ (95% CI)                | $\beta$ (95% CI)               | $\beta$ (95% CI)                 | $\beta$ (95% CI)             |                   |
| <b>Early pregnancy</b> |      |          |                                 |                                 |                                |                                  |                              |                   |
| CRL                    | 1614 | Basic    | -0.03 (-0.17 ; 0.10)            | -0.08 (-0.21 ; 0.05)            | -0.08 (-0.20 ; 0.05)           | <i>Reference</i>                 | 0.01 (-0.02 ; 0.05)          | 0.48              |
|                        |      | Adjusted | 0.002 (-0.15 ; 0.16)            | -0.04 (-0.17 ; 0.10)            | -0.06 (-0.19 ; 0.06)           | <i>Reference</i>                 | 0.01 (-0.03 ; 0.05)          | 0.73              |
| HC                     | 5646 | Basic    | 0.05 (-0.03 ; 0.13)             | 0.05 (-0.03 ; 0.13)             | 0.05 (-0.02 ; 0.13)            | <i>Reference</i>                 | -0.01 (-0.03 ; 0.01)         | 0.44              |
|                        |      | Adjusted | 0.02 (-0.06 ; 0.11)             | 0.04 (-0.04 ; 0.12)             | 0.05 (-0.03 ; 0.13)            | <i>Reference</i>                 | 0.002 (-0.02 ; 0.03)         | 0.90              |
| FL                     | 4682 | Basic    | 0.01 (-0.07 ; 0.09)             | <b>-0.09 (-0.17 ; -0.01)</b>    | 0.06 (-0.02 ; 0.14)            | <i>Reference</i>                 | 0.01 (-0.01 ; 0.03)          | 0.44              |
|                        |      | Adjusted | -0.09 (-0.18 ; 0.003)           | <b>-0.16 (-0.24 ; -0.07)</b>    | 0.01 (-0.06 ; 0.10)            | <i>Reference</i>                 | <b>0.04 (0.01 ; 0.06)</b>    | <b>0.003</b>      |
| <b>Mid pregnancy</b>   |      |          |                                 |                                 |                                |                                  |                              |                   |
| HC                     | 8035 | Basic    | <b>-0.08 (-0.15 ; -0.02)</b>    | <b>-0.07 (-0.13 ; -0.01)</b>    | -0.04 (-0.10 ; 0.03)           | <i>Reference</i>                 | <b>0.02 (0.01 ; 0.04)</b>    | <b>0.01</b>       |
|                        |      | Adjusted | -0.02 (-0.09 ; 0.05)            | -0.03 (-0.10 ; 0.03)            | -0.02 (-0.08 ; 0.04)           | <i>Reference</i>                 | 0.01 (-0.01 ; 0.02)          | 0.57              |
| FL                     | 8058 | Basic    | <b>0.07 (0.01 ; 0.14)</b>       | <b>0.06 (0.001 ; 0.13)</b>      | 0.05 (-0.01 ; 0.12)            | <i>Reference</i>                 | <b>-0.02 (-0.04 ; -0.01)</b> | <b>0.01</b>       |
|                        |      | Adjusted | -0.01 (-0.08 ; 0.07)            | 0.02 (-0.05 ; 0.09)             | 0.02 (-0.05 ; 0.08)            | <i>Reference</i>                 | -0.004 (-0.02 ; 0.02)        | 0.69              |

1  
2  
3  
4  
5  
6  
7  
8  
9  
10  
11  
12  
13  
14  
15  
16  
17  
18  
19  
20  
21  
22  
23  
24  
25  
26  
27  
28  
29  
30  
31  
32  
33  
34  
35  
36  
37  
38  
39  
40  
41  
42  
43  
44  
45  
46

|                       |      |          |                              |                              |                              |                  |                           |                  |
|-----------------------|------|----------|------------------------------|------------------------------|------------------------------|------------------|---------------------------|------------------|
| AC                    | 8052 | Basic    | <b>-0.15 (-0.21 ; -0.09)</b> | <b>-0.15 (-0.21 ; -0.09)</b> | <b>-0.09 (-0.15 ; -0.03)</b> | <i>Reference</i> | <b>0.04 (0.03 ; 0.06)</b> | <b>&lt;0.001</b> |
|                       |      | Adjusted | <b>-0.10 (-0.17 ; -0.03)</b> | <b>-0.11 (-0.18 ; -0.05)</b> | <b>-0.07 (-0.13 ; -0.01)</b> | <i>Reference</i> | <b>0.03 (0.01 ; 0.05)</b> | <b>0.01</b>      |
| EFW                   | 8016 | Basic    | -0.06 (-0.12 ; 0.01)         | -0.06 (-0.12 ; 0.003)        | -0.03 (-0.09 ; 0.03)         | <i>Reference</i> | 0.01 (-0.001 ; 0.03)      | 0.08             |
|                       |      | Adjusted | -0.06 (-0.14 ; 0.01)         | -0.06 (-0.13 ; 0.01)         | -0.03 (-0.10 ; 0.03)         | <i>Reference</i> | 0.02 (-0.004 ; 0.03)      | 0.13             |
| <b>Late pregnancy</b> |      |          |                              |                              |                              |                  |                           |                  |
| HC                    | 8163 | Basic    | <b>-0.24 (-0.31 ; -0.18)</b> | <b>-0.25 (-0.31 ; -0.19)</b> | <b>-0.11 (-0.17 ; -0.05)</b> | <i>Reference</i> | <b>0.06 (0.05 ; 0.08)</b> | <b>&lt;0.001</b> |
|                       |      | Adjusted | <b>-0.14 (-0.21 ; -0.08)</b> | <b>-0.17 (-0.24 ; -0.11)</b> | <b>-0.07 (-0.14 ; -0.01)</b> | <i>Reference</i> | <b>0.03 (0.02 ; 0.05)</b> | <b>&lt;0.001</b> |
| FL                    | 8234 | Basic    | -0.06 (-0.12 ; 0.003)        | -0.03 (-0.09 ; 0.03)         | -0.02 (-0.08 ; 0.05)         | <i>Reference</i> | 0.01 (-0.01 ; 0.03)       | 0.21             |
|                       |      | Adjusted | <b>-0.10 (-0.17 ; -0.02)</b> | -0.04 (-0.10 ; 0.03)         | -0.03 (-0.09 ; 0.04)         | <i>Reference</i> | 0.02 (-0.002 ; 0.04)      | 0.08             |
| AC                    | 8212 | Basic    | <b>-0.24 (-0.30 ; -0.18)</b> | <b>-0.21 (-0.27 ; -0.15)</b> | <b>-0.10 (-0.16 ; -0.04)</b> | <i>Reference</i> | <b>0.06 (0.05 ; 0.08)</b> | <b>&lt;0.001</b> |
|                       |      | Adjusted | <b>-0.16 (-0.23 ; -0.09)</b> | <b>-0.13 (-0.20 ; -0.07)</b> | <b>-0.07 (-0.13 ; -0.01)</b> | <i>Reference</i> | <b>0.04 (0.02 ; 0.06)</b> | <b>&lt;0.001</b> |
| EFW                   | 8201 | Basic    | <b>-0.22 (-0.28 ; -0.16)</b> | <b>-0.18 (-0.24 ; -0.11)</b> | <b>-0.09 (-0.15 ; -0.02)</b> | <i>Reference</i> | <b>0.06 (0.04 ; 0.07)</b> | <b>&lt;0.001</b> |
|                       |      | Adjusted | <b>-0.17 (-0.25 ; -0.10)</b> | <b>-0.12 (-0.19 ; -0.06)</b> | <b>-0.07 (-0.13 ; -0.01)</b> | <i>Reference</i> | <b>0.04 (0.02 ; 0.06)</b> | <b>&lt;0.001</b> |

104 Abbreviations: HC: head circumference, FL: femur length, AC: abdominal circumference, EFW: estimated fetal weight. Values are regression coefficients  
 105 with the 95% CI of the data in SD-score and are based on linear regression models. Basic model: by the use of SD scores it is automatically adjusted for  
 106 gestational age. Fully adjusted model: basic model and additionally adjusted for maternal age, educational level, smoking, alcohol use, folic acid supplement  
 107 use, ethnicity, parity, pre-pregnancy body mass index and fetal sex. p-for trend analysis with the neighbourhood deprivation as a continuous measure.



1  
2  
3  
4  
5  
6  
7  
8  
9  
10  
11  
12  
13  
14  
15  
16  
17  
18  
19  
20  
21  
22  
23  
24  
25  
26  
27  
28  
29  
30  
31  
32  
33  
34  
35  
36  
37  
38  
39  
40  
41  
42  
43  
44  
45  
46

108 **Supplemental Table 9.** Associations between the neighbourhood status score and SGA pregnancies, adjusted for maternal hypertension.

| Study population          | Model    | Lowest deprivation quartile<br>n = 1190 | Second deprivation quartile<br>n = 1068 | Third deprivation quartile<br>n = 1273 | Highest deprivation quartile<br>n = 1653 | Trend               | p-value for trend                                |              |
|---------------------------|----------|-----------------------------------------|-----------------------------------------|----------------------------------------|------------------------------------------|---------------------|--------------------------------------------------|--------------|
|                           |          | OR (95% CI)                             | OR (95% CI)                             | OR (95% CI)                            |                                          | OR (95% CI)         |                                                  |              |
| Small for gestational age | Adjusted | <b>1.39</b><br>(1.09 ; 1.77)            | <b>0.01</b><br>(0.91 ; 1.46)            | 1.15<br>(0.89 ; 1.43)                  | 0.24<br>(0.89 ; 1.43)                    | 1.13<br><i>0.31</i> | <i>Reference</i><br><b>0.91</b><br>(0.85 ; 0.97) | <b>0.004</b> |

109 Abbreviations:  $\beta$ : beta; OR: odds ratio. Values are odds ratios with the 95% CI of the data in SD-score and are based on logistic regression models. Adjusted  
110 model: basic model and additionally adjusted for maternal age, educational level, smoking, alcohol use, folic acid supplement use, ethnicity, parity, pre-  
111 pregnancy body mass index, fetal sex, and additionally for maternal hypertension.. P-for trend analysis with the neighbourhood deprivation as a continuous  
112 measure. Small size for gestational age (SGA) at birth was defined as a sex and gestational age adjusted birthweight below the 10th percentile (<-1.40 SD-  
113 score) in the study cohort.

115 **Supplemental Table 10.** Observed and expected values of covariates.

| <b>Maternal characteristics</b>                   |                    |                    |
|---------------------------------------------------|--------------------|--------------------|
|                                                   | <b>Observed</b>    | <b>Expected</b>    |
| Age at intake (years)                             | 29.6 (5.3)         | 29.6 (5.3)         |
| Prepregnancy body mass index (kg/m <sup>2</sup> ) | 22.8 (18.4 – 32.2) | 22.6 (18.6 – 32.4) |
| Parity (nulliparous)                              | 4796 (55.7)        | 4739 (55.7)        |
| Fetal sex (boy)                                   | 4347 (50.4)        | 4346 (50.4)        |
| Educational level                                 |                    |                    |
| Lower/no education                                | 1101 (12.8)        | 916 (11.7)         |
| Middle                                            | 4060 (47.1)        | 3638 (46.4)        |
| High                                              | 3456 (40.1)        | 3282 (41.9)        |
| Ethnicity                                         |                    |                    |
| Dutch and Western                                 | 4967 (57.6)        | 4793 (58.8)        |
| Turkish and Moroccan                              | 1464 (17.0)        | 1330 (16.3)        |
| African                                           | 1178 (13.7)        | 1076 (13.2)        |
| Asian                                             | 1008 (11.7)        | 946 (11.6)         |
| Smoking                                           |                    |                    |
| Never smoked during pregnancy                     | 6256 (72.6)        | 5472 (72.8)        |
| Smoked until pregnancy was known                  | 735 (8.5)          | 644 (8.6)          |
| Continued smoking in pregnancy                    | 1626 (18.9)        | 1403 (18.7)        |
| Alcohol                                           |                    |                    |
| Never alcohol consumption in pregnancy            | 4351 (50.5)        | 3692 (49.8)        |
| Alcohol consumption until pregnancy was known     | 1149 (13.3)        | 999 (13.5)         |
| Continued alcohol consumption in pregnancy        | 3117 (36.2)        | 2728 (36.8)        |
| Folic acid supplement use                         |                    |                    |
| None                                              | 2751 (31.9)        | 1877 (29.4)        |
| Start in first 10 weeks of pregnancy              | 2661 (30.9)        | 1981 (31.1)        |
| Start preconceptional                             | 3205 (37.2)        | 2518 (39.5)        |

116 Data are represented as n (%), mean (SD) or median with the 90% range. Percentages 'expected'

117 displayed as valid percentages.

1  
2  
3 118 **Supplemental 1.** First trimester and fetal growth, measurement guidelines.

4 119

5 120 **CRL: crown-rump length (39)**

6  
7 121 CRL is measured as the largest dimension of embryo, excluding the yolk sac and extremities. A  
8 122 midline sagittal section of the whole embryo or fetus should be obtained, ideally with the embryo or  
9 123 fetus oriented horizontally on the screen. An image should be magnified sufficiently to fill most of the  
10 124 width of the ultrasound screen, so that the measurement line between crown and rump is at about 90°  
11 125 to the ultrasound beam.

12  
13  
14 126 Caliper placement: measure the fetus in a neutral position (i.e. neither flexed nor hyperextended). The  
15 127 end points of crown and rump should be defined clearly.

16 128

17 129

18 130 **HC: Head circumference (40)**

19 131 As described for the BPD, ensuring that the circumference placement markers correspond to the  
20 132 technique described on the reference chart.

21 133 Caliper placement: If the ultrasound equipment has ellipse measurement capacity, then the HC can be  
22 134 measured directly by placing the ellipse around the outside of the skull bone echoes.

23 135

24 136

25 137 **AC: abdominal circumference (40)**

26 138 - Transverse section of the fetal abdomen (as circular as possible);

27 139 - umbilical vein at the level of the portal sinus;

28 140 - stomach bubble visualized;

29 141 - kidneys should not be visible.

30 142 Caliper placement: The AC is measured at the outer surface of the skin line, either directly with ellipse  
31 143 calipers or calculated from linear measurements made perpendicular to each other, usually the  
32 144 anteroposterior abdominal diameter and transverse abdominal diameter.

33 145

34 146

35 147

36 148 **FL: femur length (40)**

37 149 The FL is imaged optimally with both ends of the ossified metaphysis clearly visible. The longest  
38 150 axis of the ossified diaphysis is measured. The same technique as that used to establish the reference  
39 151 chart should be used with regard to the angle between the femur and the insonating ultrasound beams.  
40 152 An angle of insonation between 45° and 90° is typical.

41 153 Caliper placement: Each caliper is placed at the ends of the ossified diaphysis without including the  
42 154 distal femoral epiphysis if it is visible

43 155

44 156

45 157

46 158

47 159

48 160

1  
2  
3 156 **Supplemental 2.** Multiple imputations for missing data of covariates.  
4

5 157 We imputed missing data of the covariates using multiple imputations (17). The percentages of  
6  
7 158 missing values for the confounders within the population for analysis were lower than 20%. For the  
8  
9 159 multiple imputation, we the Markov chain Monte Carlo approach. In the imputation model, we  
10  
11 160 included all confounders, plus maternal age, ethnicity, parity and prepregnancy BMI. Furthermore, we  
12  
13 161 additionally added the studied determinants and outcomes in the imputation model as prediction  
14  
15 162 variables only; they were not imputed themselves. Five imputed datasets were created and analyzed  
16  
17 163 together.  
18  
19  
20  
21  
22  
23  
24  
25  
26  
27  
28  
29  
30  
31  
32  
33  
34  
35  
36  
37  
38  
39  
40  
41  
42  
43  
44  
45  
46  
47  
48  
49  
50  
51  
52  
53  
54  
55  
56  
57  
58  
59  
60

---

For peer review only

# Reporting checklist for cohort study.

Based on the STROBE cohort guidelines.

## Instructions to authors

Complete this checklist by entering the page numbers from your manuscript where readers will find each of the items listed below.

Your article may not currently address all the items on the checklist. Please modify your text to include the missing information. If you are certain that an item does not apply, please write "n/a" and provide a short explanation.

Upload your completed checklist as an extra file when you submit to a journal.

In your methods section, say that you used the STROBE cohort reporting guidelines, and cite them as:

von Elm E, Altman DG, Egger M, Pocock SJ, Gøtzsche PC, Vandenbroucke JP. The Strengthening the Reporting of Observational Studies in Epidemiology (STROBE) Statement: guidelines for reporting observational studies.

|                           |                                                                                                        | Page   |
|---------------------------|--------------------------------------------------------------------------------------------------------|--------|
|                           | Reporting Item                                                                                         | Number |
| <b>Title and abstract</b> |                                                                                                        |        |
| Title                     | <a href="#">#1a</a> Indicate the study's design with a commonly used term in the title or the abstract | 1      |

|    |                      |                     |                                                                 |         |
|----|----------------------|---------------------|-----------------------------------------------------------------|---------|
| 1  | Abstract             | <a href="#">#1b</a> | Provide in the abstract an informative and balanced summary     | 2       |
| 2  |                      |                     |                                                                 |         |
| 3  |                      |                     | of what was done and what was found                             |         |
| 4  |                      |                     |                                                                 |         |
| 5  |                      |                     |                                                                 |         |
| 6  | <b>Introduction</b>  |                     |                                                                 |         |
| 7  |                      |                     |                                                                 |         |
| 8  |                      |                     |                                                                 |         |
| 9  |                      |                     |                                                                 |         |
| 10 | Background /         | <a href="#">#2</a>  | Explain the scientific background and rationale for the         | 4       |
| 11 | rationale            |                     | investigation being reported                                    |         |
| 12 |                      |                     |                                                                 |         |
| 13 |                      |                     |                                                                 |         |
| 14 |                      |                     |                                                                 |         |
| 15 | Objectives           | <a href="#">#3</a>  | State specific objectives, including any prespecified           | 4       |
| 16 |                      |                     | hypotheses                                                      |         |
| 17 |                      |                     |                                                                 |         |
| 18 |                      |                     |                                                                 |         |
| 19 |                      |                     |                                                                 |         |
| 20 | <b>Methods</b>       |                     |                                                                 |         |
| 21 |                      |                     |                                                                 |         |
| 22 |                      |                     |                                                                 |         |
| 23 | Study design         | <a href="#">#4</a>  | Present key elements of study design early in the paper         | 4, 5    |
| 24 |                      |                     |                                                                 |         |
| 25 |                      |                     |                                                                 |         |
| 26 | Setting              | <a href="#">#5</a>  | Describe the setting, locations, and relevant dates, including  | 4, 5    |
| 27 |                      |                     | periods of recruitment, exposure, follow-up, and data           |         |
| 28 |                      |                     | collection                                                      |         |
| 29 |                      |                     |                                                                 |         |
| 30 |                      |                     |                                                                 |         |
| 31 |                      |                     |                                                                 |         |
| 32 |                      |                     |                                                                 |         |
| 33 |                      |                     |                                                                 |         |
| 34 | Eligibility criteria | <a href="#">#6a</a> | Give the eligibility criteria, and the sources and methods of   | 4, 5    |
| 35 |                      |                     | selection of participants. Describe methods of follow-up.       |         |
| 36 |                      |                     |                                                                 |         |
| 37 |                      |                     |                                                                 |         |
| 38 |                      |                     |                                                                 |         |
| 39 | Eligibility criteria | <a href="#">#6b</a> | For matched studies, give matching criteria and number of       | 4, 5    |
| 40 |                      |                     | exposed and unexposed                                           |         |
| 41 |                      |                     |                                                                 |         |
| 42 |                      |                     |                                                                 |         |
| 43 |                      |                     |                                                                 |         |
| 44 |                      |                     |                                                                 |         |
| 45 | Variables            | <a href="#">#7</a>  | Clearly define all outcomes, exposures, predictors, potential   | 5, 6    |
| 46 |                      |                     | confounders, and effect modifiers. Give diagnostic criteria, if |         |
| 47 |                      |                     | applicable                                                      |         |
| 48 |                      |                     |                                                                 |         |
| 49 |                      |                     |                                                                 |         |
| 50 |                      |                     |                                                                 |         |
| 51 |                      |                     |                                                                 |         |
| 52 |                      |                     |                                                                 |         |
| 53 | Data sources /       | <a href="#">#8</a>  | For each variable of interest give sources of data and details  | 4, 5, 6 |
| 54 | measurement          |                     | of methods of assessment (measurement). Describe                |         |
| 55 |                      |                     | comparability of assessment methods if there is more than       |         |
| 56 |                      |                     |                                                                 |         |
| 57 |                      |                     |                                                                 |         |
| 58 |                      |                     |                                                                 |         |
| 59 |                      |                     |                                                                 |         |
| 60 |                      |                     |                                                                 |         |

one group. Give information separately for for exposed and unexposed groups if applicable.

|    |                |                      |                                                            |         |
|----|----------------|----------------------|------------------------------------------------------------|---------|
| 1  |                |                      |                                                            |         |
| 2  |                |                      |                                                            |         |
| 3  |                |                      |                                                            |         |
| 4  |                |                      |                                                            |         |
| 5  |                |                      |                                                            |         |
| 6  | Bias           | <a href="#">#9</a>   | Describe any efforts to address potential sources of bias  | 5, 6, 8 |
| 7  |                |                      |                                                            |         |
| 8  |                |                      |                                                            |         |
| 9  | Study size     | <a href="#">#10</a>  | Explain how the study size was arrived at                  | 4, 5    |
| 10 |                |                      |                                                            |         |
| 11 |                |                      |                                                            |         |
| 12 | Quantitative   | <a href="#">#11</a>  | Explain how quantitative variables were handled in the     | 7, 8    |
| 13 |                |                      |                                                            |         |
| 14 | variables      |                      | analyses. If applicable, describe which groupings were     |         |
| 15 |                |                      | chosen, and why                                            |         |
| 16 |                |                      |                                                            |         |
| 17 |                |                      |                                                            |         |
| 18 |                |                      |                                                            |         |
| 19 | Statistical    | <a href="#">#12a</a> | Describe all statistical methods, including those used to  |         |
| 20 |                |                      |                                                            |         |
| 21 | methods        |                      | control for confounding                                    |         |
| 22 |                |                      |                                                            |         |
| 23 |                |                      |                                                            |         |
| 24 |                |                      |                                                            |         |
| 25 | 6, 8           |                      |                                                            |         |
| 26 |                |                      |                                                            |         |
| 27 |                |                      |                                                            |         |
| 28 | Statistical    | <a href="#">#12b</a> | Describe any methods used to examine subgroups and         | 7, 8    |
| 29 |                |                      |                                                            |         |
| 30 | methods        |                      | interactions                                               |         |
| 31 |                |                      |                                                            |         |
| 32 |                |                      |                                                            |         |
| 33 | Statistical    | <a href="#">#12c</a> | Explain how missing data were addressed                    | 7, 8    |
| 34 |                |                      |                                                            |         |
| 35 | methods        |                      |                                                            |         |
| 36 |                |                      |                                                            |         |
| 37 |                |                      |                                                            |         |
| 38 |                |                      |                                                            |         |
| 39 | Statistical    | <a href="#">#12d</a> | If applicable, explain how loss to follow-up was addressed | 7, 8    |
| 40 |                |                      |                                                            |         |
| 41 | methods        |                      |                                                            |         |
| 42 |                |                      |                                                            |         |
| 43 |                |                      |                                                            |         |
| 44 | Statistical    | <a href="#">#12e</a> | Describe any sensitivity analyses                          |         |
| 45 |                |                      |                                                            |         |
| 46 | methods        |                      |                                                            |         |
| 47 |                |                      |                                                            |         |
| 48 |                |                      |                                                            |         |
| 49 | 7, 8           |                      |                                                            |         |
| 50 |                |                      |                                                            |         |
| 51 |                |                      |                                                            |         |
| 52 | <b>Results</b> |                      |                                                            |         |
| 53 |                |                      |                                                            |         |
| 54 |                |                      |                                                            |         |
| 55 |                |                      |                                                            |         |
| 56 | Participants   | <a href="#">#13a</a> | Report numbers of individuals at each stage of study—eg    | 9       |
| 57 |                |                      |                                                            |         |
| 58 |                |                      | numbers potentially eligible, examined for eligibility,    |         |
| 59 |                |                      |                                                            |         |
| 60 |                |                      |                                                            |         |

confirmed eligible, included in the study, completing follow-up, and analysed. Give information separately for for exposed and unexposed groups if applicable.

|    |                  |                      |                                                                                                                                                                                                                   |       |
|----|------------------|----------------------|-------------------------------------------------------------------------------------------------------------------------------------------------------------------------------------------------------------------|-------|
| 1  |                  |                      |                                                                                                                                                                                                                   |       |
| 2  |                  |                      |                                                                                                                                                                                                                   |       |
| 3  |                  |                      |                                                                                                                                                                                                                   |       |
| 4  |                  |                      |                                                                                                                                                                                                                   |       |
| 5  |                  |                      |                                                                                                                                                                                                                   |       |
| 6  |                  |                      |                                                                                                                                                                                                                   |       |
| 7  |                  |                      |                                                                                                                                                                                                                   |       |
| 8  | Participants     | <a href="#">#13b</a> | Give reasons for non-participation at each stage                                                                                                                                                                  | 9     |
| 9  |                  |                      |                                                                                                                                                                                                                   |       |
| 10 |                  |                      |                                                                                                                                                                                                                   |       |
| 11 | Participants     | <a href="#">#13c</a> | Consider use of a flow diagram                                                                                                                                                                                    |       |
| 12 |                  |                      |                                                                                                                                                                                                                   |       |
| 13 |                  |                      |                                                                                                                                                                                                                   |       |
| 14 | 9                |                      |                                                                                                                                                                                                                   |       |
| 15 |                  |                      |                                                                                                                                                                                                                   |       |
| 16 |                  |                      |                                                                                                                                                                                                                   |       |
| 17 | Descriptive data | <a href="#">#14a</a> | Give characteristics of study participants (eg demographic, clinical, social) and information on exposures and potential confounders. Give information separately for exposed and unexposed groups if applicable. | 9     |
| 18 |                  |                      |                                                                                                                                                                                                                   |       |
| 19 |                  |                      |                                                                                                                                                                                                                   |       |
| 20 |                  |                      |                                                                                                                                                                                                                   |       |
| 21 |                  |                      |                                                                                                                                                                                                                   |       |
| 22 |                  |                      |                                                                                                                                                                                                                   |       |
| 23 |                  |                      |                                                                                                                                                                                                                   |       |
| 24 |                  |                      |                                                                                                                                                                                                                   |       |
| 25 |                  |                      |                                                                                                                                                                                                                   |       |
| 26 |                  |                      |                                                                                                                                                                                                                   |       |
| 27 | Descriptive data | <a href="#">#14b</a> | Indicate number of participants with missing data for each variable of interest                                                                                                                                   |       |
| 28 |                  |                      |                                                                                                                                                                                                                   |       |
| 29 |                  |                      |                                                                                                                                                                                                                   |       |
| 30 |                  |                      |                                                                                                                                                                                                                   |       |
| 31 |                  |                      |                                                                                                                                                                                                                   |       |
| 32 | 9                |                      |                                                                                                                                                                                                                   |       |
| 33 |                  |                      |                                                                                                                                                                                                                   |       |
| 34 |                  |                      |                                                                                                                                                                                                                   |       |
| 35 |                  |                      |                                                                                                                                                                                                                   |       |
| 36 | Descriptive data | <a href="#">#14c</a> | Summarise follow-up time (eg, average and total amount)                                                                                                                                                           |       |
| 37 |                  |                      |                                                                                                                                                                                                                   |       |
| 38 |                  |                      |                                                                                                                                                                                                                   |       |
| 39 | 9                |                      |                                                                                                                                                                                                                   |       |
| 40 |                  |                      |                                                                                                                                                                                                                   |       |
| 41 |                  |                      |                                                                                                                                                                                                                   |       |
| 42 | Outcome data     | <a href="#">#15</a>  | Report numbers of outcome events or summary measures over time. Give information separately for exposed and unexposed groups if applicable.                                                                       |       |
| 43 |                  |                      |                                                                                                                                                                                                                   |       |
| 44 |                  |                      |                                                                                                                                                                                                                   |       |
| 45 |                  |                      |                                                                                                                                                                                                                   |       |
| 46 |                  |                      |                                                                                                                                                                                                                   |       |
| 47 |                  |                      |                                                                                                                                                                                                                   |       |
| 48 |                  |                      |                                                                                                                                                                                                                   |       |
| 49 | 9, 10            |                      |                                                                                                                                                                                                                   |       |
| 50 |                  |                      |                                                                                                                                                                                                                   |       |
| 51 |                  |                      |                                                                                                                                                                                                                   |       |
| 52 | Main results     | <a href="#">#16a</a> | Give unadjusted estimates and, if applicable, confounder-adjusted estimates and their precision (eg, 95% confidence                                                                                               | 9, 10 |
| 53 |                  |                      |                                                                                                                                                                                                                   |       |
| 54 |                  |                      |                                                                                                                                                                                                                   |       |
| 55 |                  |                      |                                                                                                                                                                                                                   |       |
| 56 |                  |                      |                                                                                                                                                                                                                   |       |
| 57 |                  |                      |                                                                                                                                                                                                                   |       |
| 58 |                  |                      |                                                                                                                                                                                                                   |       |
| 59 |                  |                      |                                                                                                                                                                                                                   |       |
| 60 |                  |                      |                                                                                                                                                                                                                   |       |



interval). Make clear which confounders were adjusted for  
and why they were included

1  
2  
3  
4  
5  
6 Main results [#16b](#) Report category boundaries when continuous variables were 9, 10  
7  
8 categorized  
9

10  
11 Main results [#16c](#) If relevant, consider translating estimates of relative risk into  
12 absolute risk for a meaningful time period  
13  
14

15  
16 9, 10  
17  
18

19  
20 Other analyses [#17](#) Report other analyses done—eg analyses of subgroups and 10, 11  
21 interactions, and sensitivity analyses  
22  
23

## 24 Discussion

25  
26  
27  
28 Key results [#18](#) Summarise key results with reference to study objectives 11  
29

30  
31 Limitations [#19](#) Discuss limitations of the study, taking into account sources 12, 13  
32 of potential bias or imprecision. Discuss both direction and  
33 magnitude of any potential bias.  
34  
35

36  
37  
38  
39 Interpretation [#20](#) Give a cautious overall interpretation considering objectives, 13, 14  
40 limitations, multiplicity of analyses, results from similar  
41 studies, and other relevant evidence.  
42  
43  
44

45  
46 Generalisability [#21](#) Discuss the generalisability (external validity) of the study 13  
47 results  
48  
49

## 50 Other Information

1 Funding [#22](#) Give the source of funding and the role of the funders for the 15  
2  
3 present study and, if applicable, for the original study on  
4  
5 which the present article is based  
6  
7  
8

9 The STROBE checklist is distributed under the terms of the Creative Commons Attribution License  
10  
11 CC-BY. This checklist was completed on 14. January 2021 using <https://www.goodreports.org/>, a tool  
12  
13 made by the [EQUATOR Network](#) in collaboration with [Penelope.ai](#)  
14  
15  
16  
17  
18  
19  
20  
21  
22  
23  
24  
25  
26  
27  
28  
29  
30  
31  
32  
33  
34  
35  
36  
37  
38  
39  
40  
41  
42  
43  
44  
45  
46  
47  
48  
49  
50  
51  
52  
53  
54  
55  
56  
57  
58  
59  
60
