# Supplementary material for: Association between neighbourhood deprivation, fetal growth, small-for-gestational age and preterm birth: a population-based prospective cohort study
Source: PubMed Central journal article supplement — BMJ Open. 2021 Nov 16;11(11):e049075. doi: 10.1136/bmjopen-2021-049075 (PMC8596053; doi:10.1136/bmjopen-2021-049075), 2021-11-16
Supplement: bmjopen-2021-049075supp001.pdf [file bmjopen-2021-049075supp001.pdf]

1 [Supplemental data](#)2 **Supplemental Table 1.** Fetal growth and adverse pregnancy outcomes in the study population, stratified for quartiles of neighbourhood deprivation.

|                        | n    | Study population<br>n = 8617 | n    | Lowest deprivation quartile<br>n = 2170 | n    | Second deprivation quartile<br>n = 2208 | n    | Third deprivation quartile<br>n = 2090 | n    | Highest deprivation quartile<br>n = 2149 | p-value <sup>1</sup> | p-value <sup>2</sup> |
|------------------------|------|------------------------------|------|-----------------------------------------|------|-----------------------------------------|------|----------------------------------------|------|------------------------------------------|----------------------|----------------------|
| <b>Early pregnancy</b> |      |                              |      |                                         |      |                                         |      |                                        |      |                                          |                      |                      |
| CRL                    | 1614 | -0.05 (1.06)                 | 287  | 0.03 (1.05)                             | 362  | -0.01 (1.07)                            | 418  | -0.01 (0.95)                           | 547  | 0.07 (0.87)                              | 0.81                 | 0.63                 |
| HC                     | 5646 | -0.27 (1.39)                 | 1359 | -0.04 (0.99)                            | 1440 | -0.04 (1.04)                            | 1361 | -0.04 (1.10)                           | 1486 | -0.09 (1.06)                             | 0.36                 | 0.20                 |
| FL                     | 4682 | 0.61 (0.88)                  | 1162 | -0.08 (0.99)                            | 1233 | -0.18 (1.00)                            | 1107 | -0.04 (0.98)                           | 1180 | -0.10 (1.00)                             | 0.18                 | 0.74                 |
| <b>Mid pregnancy</b>   |      |                              |      |                                         |      |                                         |      |                                        |      |                                          |                      |                      |
| HC                     | 8035 | -0.02 (1.02)                 | 1972 | -0.06 (1.03)                            | 2049 | -0.04 (1.05)                            | 1973 | -0.01 (1.02)                           | 2041 | 0.03 (0.98)                              | <b>0.047</b>         | <b>0.01</b>          |
| FL                     | 8058 | 0.03 (1.03)                  | 1985 | 0.06 (1.07)                             | 2046 | 0.06 (1.08)                             | 1970 | 0.04 (1.02)                            | 2057 | -0.01 (0.97)                             | 0.12                 | <b>0.03</b>          |
| AC                     | 8052 | 0.01 (1.01)                  | 1977 | -0.04 (1.02)                            | 2050 | -0.04 (1.02)                            | 1971 | 0.02 (1.00)                            | 2054 | 0.11 (0.98)                              | <b>&lt;0.001</b>     | <b>&lt;0.001</b>     |
| EFW                    | 8016 | -0.10 (1.01)                 | 1975 | -0.12 (1.02)                            | 2035 | -0.12 (1.04)                            | 1957 | -0.09 (1.00)                           | 2049 | -0.06 (0.97)                             | 0.22                 | 0.08                 |
| <b>Late pregnancy</b>  |      |                              |      |                                         |      |                                         |      |                                        |      |                                          |                      |                      |
| HC                     | 8163 | 0.01 (1.00)                  | 2029 | -0.08 (1.00)                            | 2067 | -0.09 (1.02)                            | 1984 | 0.06 (1.00)                            | 2083 | 0.17 (0.96)                              | <b>&lt;0.001</b>     | <b>&lt;0.001</b>     |
| FL                     | 8234 | -0.01 (1.00)                 | 2049 | -0.04 (1.00)                            | 2083 | -0.01 (1.05)                            | 2005 | 0.004 (1.00)                           | 2097 | 0.02 (0.97)                              | 0.28                 | 0.06                 |
| AC                     | 8212 | 0.01 (1.01)                  | 2042 | -0.10 (1.01)                            | 2076 | -0.07 (1.04)                            | 1995 | 0.04 (1.01)                            | 2099 | 0.14 (0.97)                              | <b>&lt;0.001</b>     | <b>&lt;0.001</b>     |
| EFW                    | 8201 | 0.03 (1.02)                  | 2042 | -0.06 (1.01)                            | 2073 | -0.02 (1.04)                            | 1993 | 0.07 (1.00)                            | 2093 | 0.15 (1.00)                              | <b>&lt;0.001</b>     | <b>&lt;0.001</b>     |

**Birth**

|                           |     |            |     |             |     |             |     |            |     |            |                  |                  |
|---------------------------|-----|------------|-----|-------------|-----|-------------|-----|------------|-----|------------|------------------|------------------|
| Small for gestational age | 824 | 854 (9.9%) | 261 | 261 (12.2%) | 220 | 225 (10.1%) | 190 | 190 (9.2%) | 153 | 153 (7.1%) | <b>&lt;0.001</b> | <b>&lt;0.001</b> |
| Preterm birth             | 460 | 460 (5.3%) | 128 | 128 (5.9%)  | 142 | 142 (6.4%)  | 109 | 109 (5.2%) | 81  | 81 (3.8%)  | <b>0.001</b>     | <b>0.001</b>     |

3 Abbreviations: SD: standard deviation. HC: head circumference. FL: femur length. AC: abdominal circumference. EFW: estimated fetal weight. Values  
 4 represent data in SD-score, mean (SD) or n (%).<sup>1</sup> Differences between groups were evaluated using one-way-ANOVA-tests for continuous variables and Chi-  
 5 square tests for proportions. <sup>2</sup>Differences in growth parameters between the lowest and highest neighbourhood status score groups were tested were evaluated  
 6 using Student's t-tests. Percentages are valid percentages.

7

8 **Supplemental Table 2. Regression coefficients of longitudinal associations between quartiles of neighbourhood deprivation with fetal growth**  
 9 **patterns.**

|                                  | <b>Intercept</b>            | <b>Slope</b>                   | <b>Intercept</b>            | <b>Slope</b>                   | <b>Intercept</b>             | <b>Slope</b>                   |
|----------------------------------|-----------------------------|--------------------------------|-----------------------------|--------------------------------|------------------------------|--------------------------------|
|                                  | <b>Head circumference</b>   | <b>Head circumference</b>      | <b>Length</b>               | <b>Length</b>                  | <b>Weight</b>                | <b>Weight</b>                  |
|                                  | <b>(SDS)</b>                | <b>(SDS)</b>                   | <b>(SDS)</b>                | <b>(SDS)</b>                   | <b>(SDS)</b>                 | <b>(SDS)</b>                   |
| <b>Neighbourhood deprivation</b> |                             |                                |                             |                                |                              |                                |
| <b>Quartile 1</b>                | <b>0.225 (0.122; 0.328)</b> | <b>-0.010 (-0.013; -0.006)</b> | <b>0.270 (0.167; 0.373)</b> | <b>-0.012 (-0.016; -0.010)</b> | <b>0.229 (0.115; 0.3441)</b> | <b>-0.011 (-0.015; -0.008)</b> |
| <b>Quartile 2</b>                | <b>0.104 (0.004; 0.204)</b> | <b>-0.005 (-0.008; -0.001)</b> | <b>0.103 (0.003; 0.203)</b> | <b>-0.005 (-0.008; -0.001)</b> | <b>0.155 (0.043; 0.268)</b>  | <b>-0.008 (-0.011; -0.005)</b> |
| <b>Quartile 3</b>                | <b>0.109 (0.009; 0.208)</b> | <b>-0.004 (-0.008; -0.001)</b> | <b>0.170 (0.071; 0.270)</b> | <b>-0.006 (-0.010; -0.003)</b> | <b>0.095 (-0.018; 0.208)</b> | <b>-0.005 (-0.008; -0.001)</b> |
| <b>Quartile 4</b>                | Ref.                        | Ref.                           | Ref.                        | Ref.                           | Ref.                         | Ref.                           |

10 Values are regression coefficients obtained from linear repeated measurement models and reflect the (gestational) age independent differences (intercepts) and  
 11 the gestational age dependent differences (slopes: change in growth characteristics SDS per week per quartile of the neighbourhood deprivation score,  
 12 compared with the highest quartile of the neighbourhood deprivation score as the reference group, adjusted for maternal age, educational level, smoking,  
 13 alcohol use, folic acid supplement use, ethnicity, parity, pre-pregnancy body mass index and fetal sex.)

- 14 **Supplemental Figure 1.** Associations between neighbourhood deprivation with first trimester and  
15 fetal growth measurements.

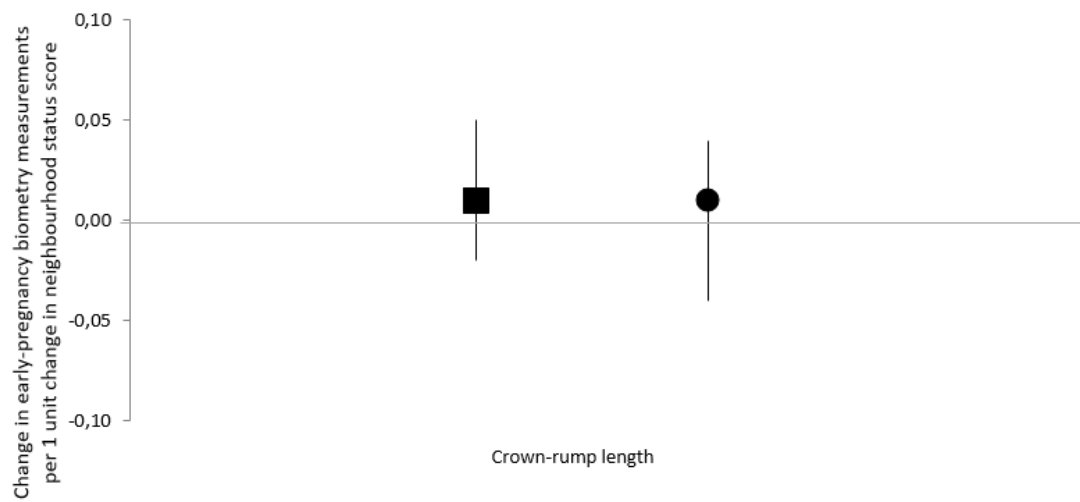

16

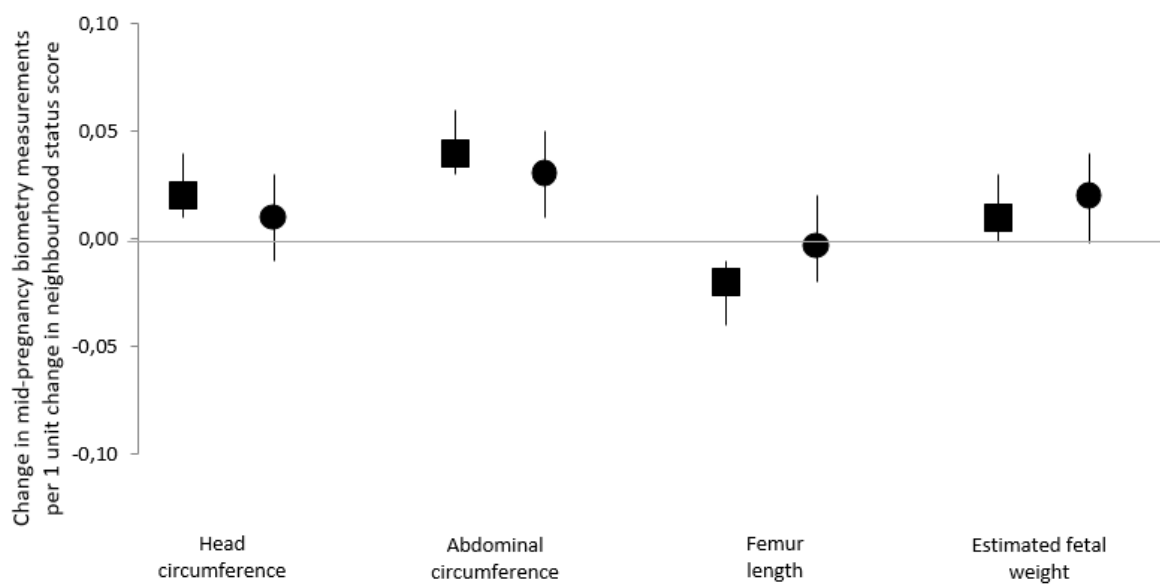

17

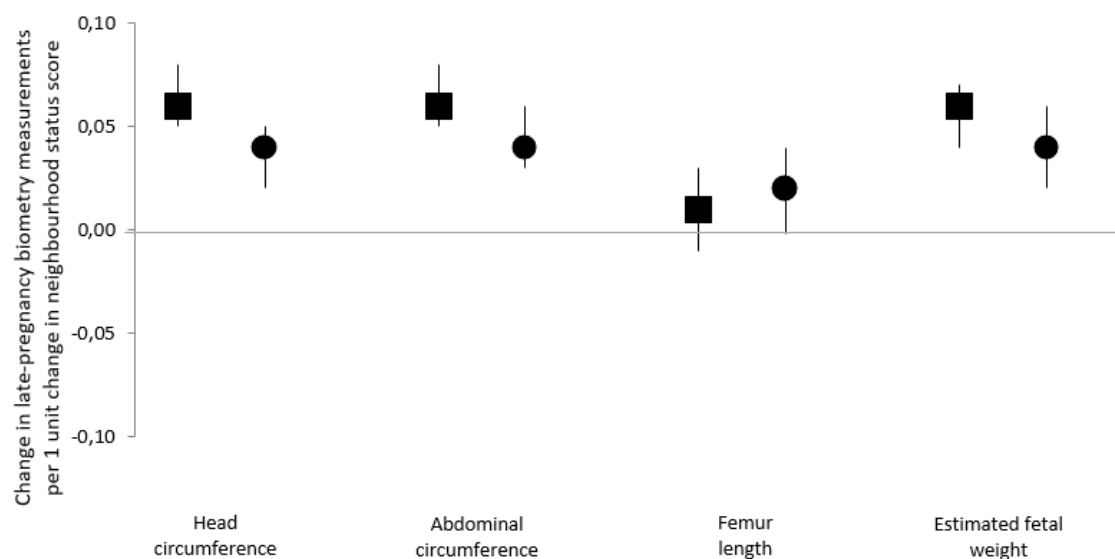

18

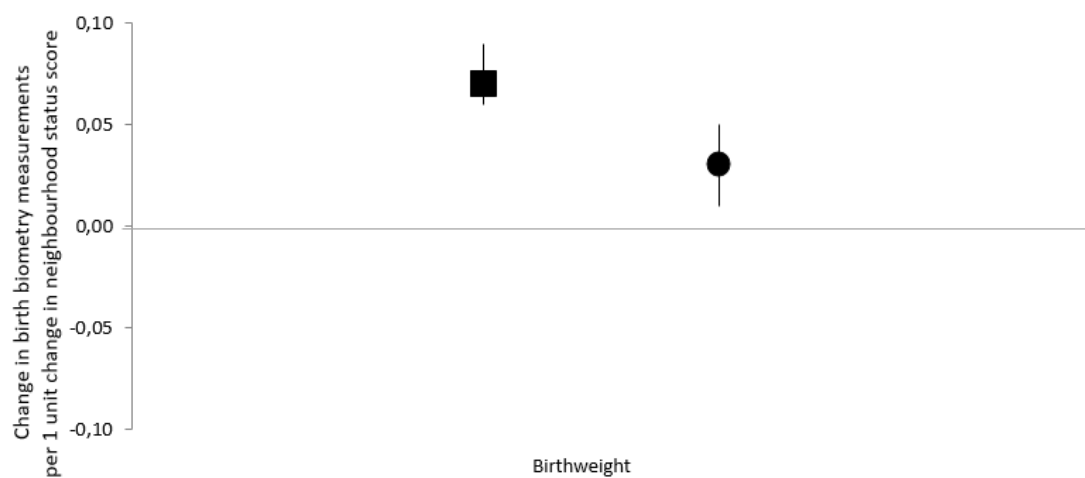

19 Data are SDS values (95% CI) from linear regression models that reflect the differences in growth  
 20 characteristics in SDS's in early pregnancy, mid-pregnancy late pregnancy and birth, per 1 unit change  
 21 in neighbourhood status score. Analyses with crown-rump length were based on subgroup analyses (n  
 22 = 1614). Estimates are from multiple imputed data. Squares show basic model; circles show the  
 23 adjusted model: basic model and additionally adjusted for maternal age, educational level, smoking,  
 24 alcohol use, folic acid supplement use, ethnicity, parity, pre-pregnancy body mass index and fetal sex.

25 **Supplemental Table 3.** P-value of interaction terms (neighbourhood deprivation \* parity and  
 26 neighbourhood deprivation \* complications in a previous pregnancy).

| <b>Study population</b> |                          |                                              |
|-------------------------|--------------------------|----------------------------------------------|
| <b>n = 8617</b>         |                          |                                              |
|                         | <b>Parity</b>            | <b>Complications in a previous pregnancy</b> |
|                         | <b>p-value for trend</b> | <b>p-value for trend</b>                     |
| <b>Early pregnancy</b>  |                          |                                              |
| CRL                     | 0.44                     | 0.36                                         |
| HC                      | 0.25                     | 0.24                                         |
| FL                      | 0.52                     | 0.91                                         |
| <b>Mid pregnancy</b>    |                          |                                              |
| HC                      | 0.15                     | 0.20                                         |
| FL                      | 0.13                     | 0.20                                         |
| AC                      | 0.73                     | 0.81                                         |
| EFW                     | 0.27                     | 0.34                                         |
| <b>Late pregnancy</b>   |                          |                                              |
| HC                      | 0.64                     | 0.62                                         |
| FL                      | 0.58                     | 0.51                                         |
| AC                      | 0.66                     | 0.88                                         |
| EFW                     | 0.82                     | 0.99                                         |
| <b>Birth</b>            |                          |                                              |
| SGA                     | 0.95                     | 0.85                                         |
| PTB                     | 0.17                     | <b>0.03</b>                                  |

27 Abbreviations:  $\beta$ : beta; CRL: crown-rump length; HC: head circumference; FL: femur length; AC:  
 28 abdominal circumference; EFW: estimated fetal weight. Values are based on the adjusted linear and  
 29 logistic regression models.

30 **Supplemental Table 4.** Associations between the neighbourhood status score and fetal growth and adverse pregnancy outcomes, split for nulliparous women,  
 31 multiparous women without a complications in a previous pregnancy or multiparous women with a complications in a previous pregnancy.

| Study population<br>n = 8617 | Nulliparous<br>N = 4739    |                   | Multiparous, no complications previous pregnancy<br>N = 3166 |                   | Multiparous, complications previous pregnancy<br>N = 606 |                   |
|------------------------------|----------------------------|-------------------|--------------------------------------------------------------|-------------------|----------------------------------------------------------|-------------------|
|                              | Trend                      |                   | Trend                                                        |                   | Trend                                                    |                   |
|                              | $\beta$ /OR (95% CI)       | p-value for trend | $\beta$ /OR (95% CI)                                         | p-value for trend | $\beta$ /OR (95% CI)                                     | p-value for trend |
| <b>Early pregnancy</b>       |                            |                   |                                                              |                   |                                                          |                   |
| CRL                          | 0.02 (-0.04 ; 0.08)        | 0.42              | -0.01 (-0.10 ; 0.07)                                         | 0.74              | 0.02 (-0.19 ; 0.22)                                      | 0.88              |
| HC                           | 0.004 (-0.03 ; 0.04)       | 0.84              | -0.01 (-0.05 ; 0.04)                                         | 0.73              | -0.04 (-0.15 ; 0.07)                                     | 0.45              |
| FL                           | 0.03 (-0.01 ; 0.07)        | 0.09              | 0.04 (-0.01 ; 0.09)                                          | 0.09              | -0.04 (-0.15 ; 0.07)                                     | 0.50              |
| <b>Mid pregnancy</b>         |                            |                   |                                                              |                   |                                                          |                   |
| HC                           | 0.02 (-0.02 ; 0.05)        | 0.32              | 0.02 (-0.02 ; 0.06)                                          | 0.30              | <b>-0.11 (-0.19 ; -0.03)</b>                             | <b>0.01</b>       |
| FL                           | 0.01 (-0.02 ; 0.04)        | 0.66              | -0.01 (-0.05 ; 0.03)                                         | 0.59              | -0.06 (-0.15 ; 0.02)                                     | 0.14              |
| AC                           | <b>0.03 (0.002 ; 0.06)</b> | <b>0.03</b>       | <b>0.05 (0.01 ; 0.09)</b>                                    | <b>0.01</b>       | -0.02 (-0.11 ; 0.07)                                     | 0.66              |
| EFW                          | 0.02 (-0.01 ; 0.05)        | 0.12              | 0.03 (-0.01 ; 0.07)                                          | 0.18              | -0.04 (-0.13 ; 0.04)                                     | 0.32              |
| <b>Late pregnancy</b>        |                            |                   |                                                              |                   |                                                          |                   |
| HC                           | <b>0.04 (0.01 ; 0.07)</b>  | <b>0.004</b>      | 0.03 (-0.003 ; 0.07)                                         | 0.07              | 0.03 (-0.05 ; 0.11)                                      | 0.50              |
| FL                           | 0.02 (-0.01 ; 0.05)        | 0.10              | -0.003 (-0.04 ; 0.03)                                        | 0.89              | 0.03 (-0.05 ; 0.11)                                      | 0.45              |

|              |                            |             |                            |              |                     |      |
|--------------|----------------------------|-------------|----------------------------|--------------|---------------------|------|
| AC           | <b>0.03 (0.002 ; 0.06)</b> | <b>0.04</b> | <b>0.04 (0.01 ; 0.08)</b>  | <b>0.03</b>  | 0.07 (-0.01 ; 0.16) | 0.10 |
| EFW          | <b>0.03 (0.01 ; 0.06)</b>  | <b>0.02</b> | <b>0.04 (0.001 ; 0.08)</b> | <b>0.048</b> | 0.07 (-0.02 ; 0.16) | 0.11 |
| <b>Birth</b> |                            |             |                            |              |                     |      |
| SGA          | <b>0.90 (0.82 ; 0.99)</b>  | <b>0.03</b> | 0.96 (0.82 ; 1.12)         | 0.60         | 0.88 (0.63 ; 1.23)  | 0.46 |
| PTB          | 0.91 (0.81 ; 1.03)         | 0.15        | <b>0.73 (0.58 ; 0.93)</b>  | <b>0.01</b>  | 0.89 (0.66 ; 1.21)  | 0.46 |

32 Abbreviations:  $\beta$ : beta; CRL: crown-rump length; HC: head circumference; FL: femur length; AC: abdominal circumference; EFW: estimated fetal weight.

33 Values are regression coefficients with the 95% CI of the data in SD-score and are based on adjusted linear and logistic regression models. Adjusted model:

34 adjusted for maternal age, educational level, smoking, alcohol use, folic acid supplement use, ethnicity, parity, pre-pregnancy body mass index and fetal sex.

35 p-for trend analysis with the neighbourhood deprivation as a continuous measure.



36 **Supplemental Figure 2.** Multilevel regression analysis of associations between the neighbourhood  
 37 deprivation and first trimester and fetal growth measurements.

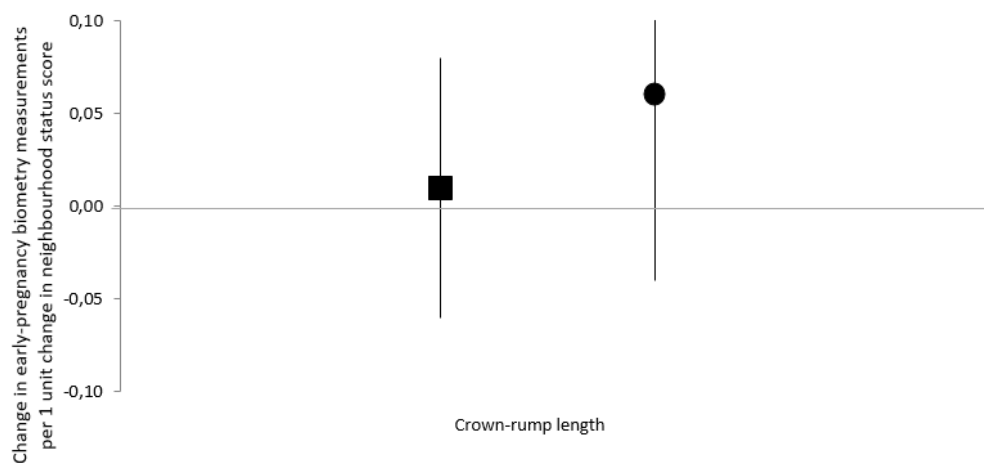

38

39

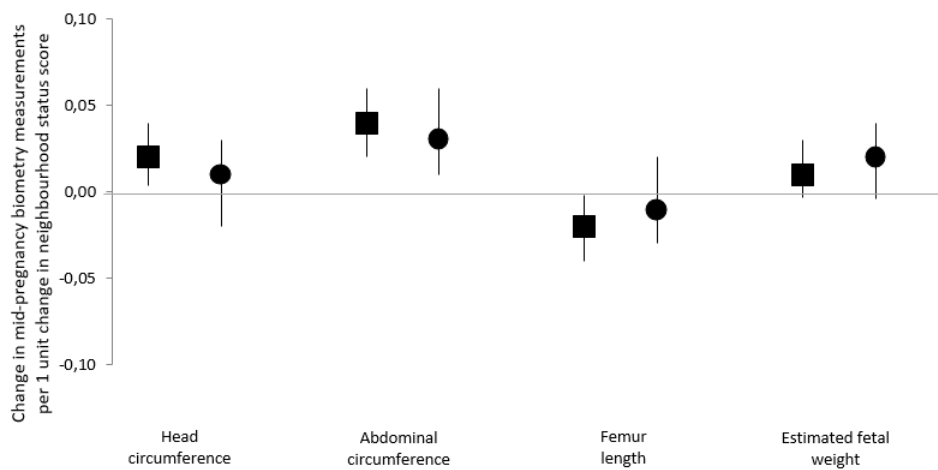

50

51

52

53

54

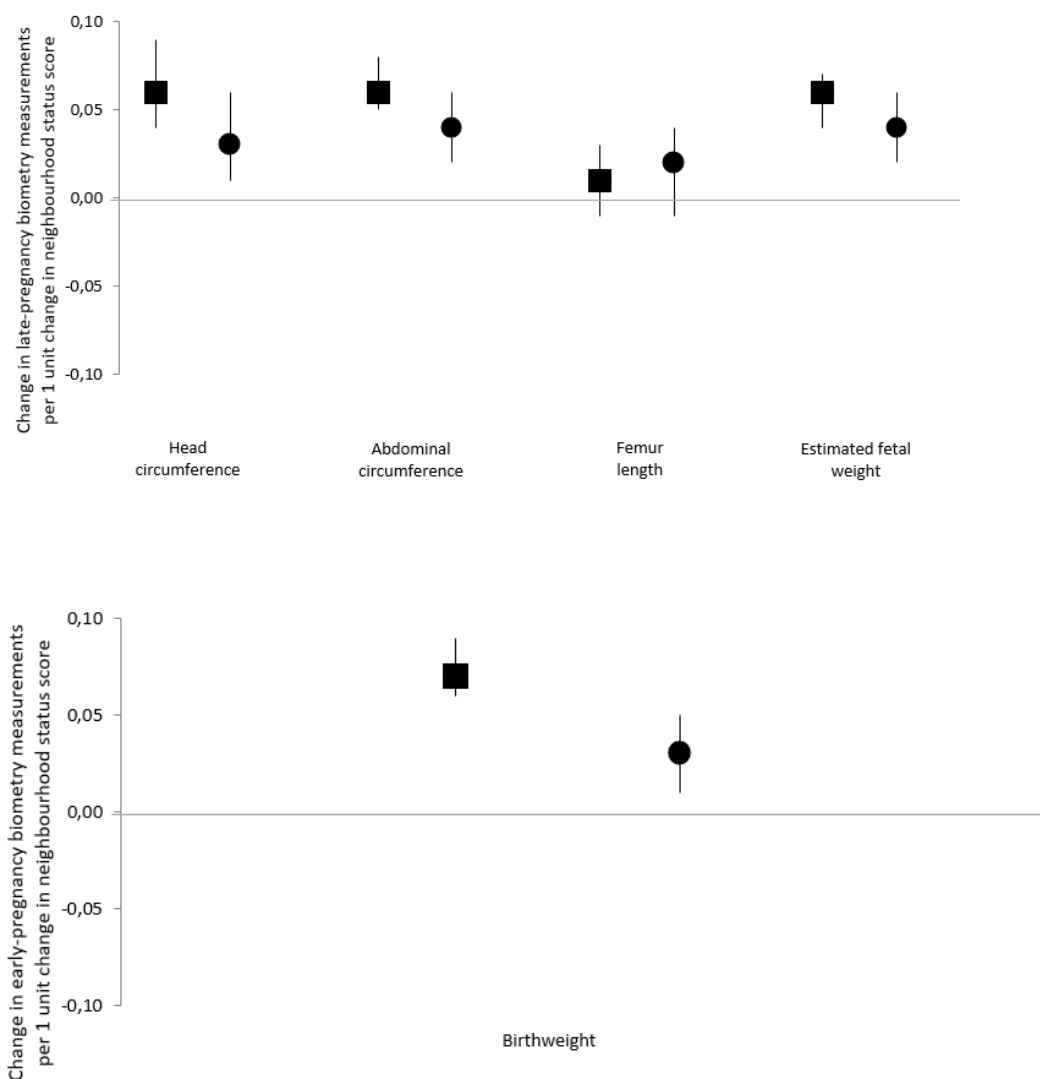

65 Data are SDS values (95% CI) from multilevel analyses and reflect the differences in growth  
66 characteristics in SDS's in early pregnancy, mid-pregnancy late pregnancy and birth, per 1 unit change  
67 in neighbourhood status score. Analyses with crown-rump length were based on subgroup analyses (n  
68 = 1614). Estimates are from multiple imputed data. Squares show basic model. Circles show adjusted  
69 model: basic model and additionally adjusted for maternal age, educational level, smoking, alcohol  
70 use, folic acid supplement use, ethnicity, parity, pre-pregnancy body mass index and fetal sex.

71 **Supplemental Table 5.** Sensitivity analysis with all available CRL measurements in the study population.

72 **a. All CRL measurement in the study population, stratified for quartiles of the neighbourhood status score.**

|     | n    | Study population<br>n = 8617 | n   | Lowest deprivation quartile<br>n = 2277 | n   | Second deprivation quartile<br>n = 2123 | n   | Third deprivation quartile<br>n = 2084 | n   | Highest deprivation quartile<br>n = 2133 | p-value <sup>1</sup> | Mean difference (95% CI) <sup>2</sup> | p-value <sup>2</sup> |
|-----|------|------------------------------|-----|-----------------------------------------|-----|-----------------------------------------|-----|----------------------------------------|-----|------------------------------------------|----------------------|---------------------------------------|----------------------|
| CRL | 1614 |                              | 287 | 0.03 (1.05)                             | 362 | -0.01 (1.07)                            | 418 | -0.01 (0.95)                           | 547 | 0.07 (0.87)                              | 0.56                 | -0.03 (-0.17 ; 0.10)                  | 0.61                 |

73

74

75

76

77 **b. All CRL measurement in the study population and the associations between quartiles of the neighbourhood status score.**

|     | n    | Model    | Lowest deprivation quartile<br>n = 300 | Second deprivation quartile<br>n = 373 | Third deprivation quartile<br>n = 399 | Highest deprivation quartile<br>n = 542 | Trend                | p-value for trend |
|-----|------|----------|----------------------------------------|----------------------------------------|---------------------------------------|-----------------------------------------|----------------------|-------------------|
|     |      |          | $\beta$ (95% CI)                       | $\beta$ (95% CI)                       | $\beta$ (95% CI)                      |                                         | $\beta$ (95% CI)     |                   |
| CRL | 1614 | Basic    | -0.03 (-0.17 ; 0.10)                   | -0.08 (-0.21 ; 0.05)                   | -0.08 (-0.20 ; 0.05)                  | <i>Reference</i>                        | 0.01 (-0.02 ; 0.05)  | 0.48              |
|     |      | Adjusted | 0.02 (-0.15 ; 0.16)                    | -0.04 (-0.17 ; 0.10)                   | -0.06 (-0.19 ; 0.06)                  | <i>Reference</i>                        | 0.004 (-0.04 ; 0.04) | 0.85              |

78

79

80 **c. All CRL measurement in the study population and the associations between quartiles of the neighbourhood status score. Complete case analysis.**

|     | n    | Model    | Lowest deprivation   | Second deprivation   | Third deprivation    | Highest deprivation  | Trend               | p-value for trend |
|-----|------|----------|----------------------|----------------------|----------------------|----------------------|---------------------|-------------------|
|     |      |          | quartile<br>n = 2268 | quartile<br>n = 2118 | quartile<br>n = 2081 | quartile<br>n = 2131 |                     |                   |
|     |      |          | $\beta$ (95% CI)     | $\beta$ (95% CI)     | $\beta$ (95% CI)     |                      | $\beta$ (95% CI)    |                   |
| CRL | 1143 | Adjusted | -0.06 (-0.23 ; 0.12) | 0.02 (-0.14 ; 0.17)  | -0.06 (-0.21 ; 0.09) | <i>Reference</i>     | 0.01 (-0.04 ; 0.05) | 0.80              |

81

82

83 **d. The association between the neighbourhood deprivation status score and all CRL measurement in the study population in a selected cohort of non-SGA pregnancies.**  
84

|     | n   | Model    | Lowest deprivation   | Second deprivation   | Third deprivation    | Highest deprivation  | Trend                | p-value for trend |
|-----|-----|----------|----------------------|----------------------|----------------------|----------------------|----------------------|-------------------|
|     |     |          | quartile<br>n = 2268 | quartile<br>n = 2118 | quartile<br>n = 2081 | quartile<br>n = 2131 |                      |                   |
|     |     |          | $\beta$ (95% CI)     | $\beta$ (95% CI)     | $\beta$ (95% CI)     |                      | $\beta$ (95% CI)     |                   |
| CRL | 434 | Basic    | 0.05 (-0.26 ; 0.35)  | 0.10 (-0.17 ; 0.37)  | -0.05 (-0.31 ; 0.21) | <i>Reference</i>     | -0.01 (-0.09 ; 0.06) | 0.73              |
|     |     | Adjusted | 0.07 (-0.30 ; 0.43)  | 0.09 (-0.19 ; 0.38)  | -0.06 (-0.33 ; 0.21) | <i>Reference</i>     | -0.02 (-0.11 ; 0.08) | 0.75              |

85 Abbreviations:  $\beta$ : beta; CRL: crown-rump length. Values are regression coefficients with the 95% CI of the data in SD-score and are based on linear  
86 regression models. Basic model: by the use of SD scores it is automatically adjusted for gestational age. Fully adjusted model: basic model and additionally  
87 adjusted for maternal age, educational level, smoking, alcohol use, folic acid supplement use, ethnicity, parity, pre-pregnancy body mass index and fetal sex.  
88 p-for trend analysis with the neighbourhood deprivation as a continuous measure. <sup>1</sup>Differences between groups were evaluated using one-way-ANOVA-tests  
89 for continuous variables. <sup>2</sup>Differences in growth parameters between the lowest and highest neighbourhood status score groups were tested were evaluated  
90 using Student's t-tests.

91 **Supplemental Table 6.** Associations between the neighbourhood status score and fetal growth in a selected cohort of non-SGA pregnancies.

| Study population<br>n = 7710 | Model    | Lowest deprivation<br>quartile<br>n = 2268 | Second deprivation<br>quartile<br>n = 2118 | Third deprivation<br>quartile<br>n = 2081 | Highest deprivation<br>quartile<br>n = 2131 | Trend                        |                   |
|------------------------------|----------|--------------------------------------------|--------------------------------------------|-------------------------------------------|---------------------------------------------|------------------------------|-------------------|
|                              |          | $\beta$ (95% CI)                           | $\beta$ (95% CI)                           | $\beta$ (95% CI)                          |                                             | $\beta$ (95% CI)             | p-value for trend |
| <b>Early pregnancy</b>       |          |                                            |                                            |                                           |                                             |                              |                   |
| CRL                          | Basic    | 0.05 (-0.26 ; 0.35)                        | 0.10 (-0.17 ; 0.37)                        | -0.05 (-0.31 ; 0.21)                      | <i>Reference</i>                            | -0.01 (-0.09 ; 0.06)         | 0.73              |
|                              | Adjusted | 0.07 (-0.30 ; 0.43)                        | 0.09 (-0.19 ; 0.38)                        | -0.06 (-0.33 ; 0.21)                      | <i>Reference</i>                            | -0.02 (-0.11 ; 0.08)         | 0.75              |
| HC                           | Basic    | <b>-0.38 (-0.71 ; -0.04)</b>               | <b>-0.37 (-0.69 ; -0.06)</b>               | -0.07 (-0.37 ; 0.23)                      | <i>Reference</i>                            | <b>0.12 (0.04 ; 0.21)</b>    | <b>0.004</b>      |
|                              | Adjusted | -0.22 (-0.60 ; 0.17)                       | -0.32 (-0.65 ; 0.01)                       | -0.06 (-0.36 ; 0.25)                      | <i>Reference</i>                            | 0.09 (-0.01 ; 0.19)          | 0.09              |
| FL                           | Basic    | -0.19 (-0.53 ; 0.15)                       | <b>-0.33 (-0.63 ; -0.03)</b>               | -0.11 (-0.40 ; 0.18)                      | <i>Reference</i>                            | 0.08 (-0.002 ; 0.16)         | 0.06              |
|                              | Adjusted | -0.24 (-0.66 ; 0.18)                       | <b>-0.36 (-0.69 ; -0.03)</b>               | -0.13 (-0.44 ; 0.18)                      | <i>Reference</i>                            | 0.10 (-0.01 ; 0.20)          | 0.07              |
| <b>Mid pregnancy</b>         |          |                                            |                                            |                                           |                                             |                              |                   |
| HC                           | Basic    | <b>-0.07 (-0.13 ; -0.001)</b>              | -0.05 (-0.12 ; 0.01)                       | -0.03 (-0.10 ; 0.04)                      | <i>Reference</i>                            | <b>0.02 (0.003 ; 0.04)</b>   | <b>0.02</b>       |
|                              | Adjusted | -0.02 (-0.10 ; 0.05)                       | -0.03 (-0.09 ; 0.04)                       | -0.02 (-0.09 ; 0.05)                      | <i>Reference</i>                            | 0.01 (-0.01 ; 0.03)          | 0.40              |
| FL                           | Basic    | <b>0.10 (0.045 ; 0.17)</b>                 | <b>0.10 (0.03 ; 0.16)</b>                  | <b>0.08 (0.01 ; 0.15)</b>                 | <i>Reference</i>                            | <b>-0.02 (-0.05 ; -0.01)</b> | <b>0.001</b>      |
|                              | Adjusted | 0.02 (-0.05 ; 0.10)                        | 0.05 (-0.03 ; 0.11)                        | 0.04 (-0.03 ; 0.11)                       | <i>Reference</i>                            | -0.01 (-0.03 ; 0.01)         | 0.42              |
| AC                           | Basic    | <b>-0.12 (-0.18 ; -0.05)</b>               | <b>-0.13 (-0.20 ; -0.07)</b>               | <b>-0.07 (-0.13 ; -0.01)</b>              | <i>Reference</i>                            | <b>0.04 (0.02 ; 0.05)</b>    | <b>&lt;0.001</b>  |

|                       |          |                              |                              |                               |                  |                           |                  |
|-----------------------|----------|------------------------------|------------------------------|-------------------------------|------------------|---------------------------|------------------|
|                       | Adjusted | <b>-0.09 (-0.16 ; -0.01)</b> | <b>-0.11 (-0.18 ; -0.04)</b> | -0.06 (-0.12 ; 0.01)          | <i>Reference</i> | <b>0.03 (0.01 ; 0.05)</b> | <b>0.01</b>      |
| EFW                   | Basic    | -0.03 (-0.08 ; 0.05)         | -0.03 (-0.09 ; 0.04)         | 0.001 (-0.07 ; 0.06)          | <i>Reference</i> | 0.01 (-0.01 ; 0.02)       | 0.77             |
|                       | Adjusted | -0.04 (-0.12 ; 0.03)         | -0.04 (-0.11 ; 0.03)         | -0.01 (-0.08 ; 0.05)          | <i>Reference</i> | 0.01 (-0.01 ; 0.03)       | 0.19             |
| <b>Late pregnancy</b> |          |                              |                              |                               |                  |                           |                  |
| HC                    | Basic    | <b>-0.22 (-0.29 ; -0.16)</b> | <b>-0.24 (-0.31 ; -0.18)</b> | <b>-0.09 (-0.16 ; -0.03)</b>  | <i>Reference</i> | <b>0.06 (0.04 ; 0.08)</b> | <b>&lt;0.001</b> |
|                       | Adjusted | <b>-0.13 (-0.20 ; -0.06)</b> | <b>-0.18 (-0.24 ; -0.11)</b> | <b>-0.06 (-0.12 ; -0.001)</b> | <i>Reference</i> | <b>0.03 (0.01 ; 0.05)</b> | <b>&lt;0.001</b> |
| FL                    | Basic    | -0.02 (-0.09 ; 0.04)         | 0.01 (-0.05 ; 0.07)          | 0.01 (-0.05 ; 0.08)           | <i>Reference</i> | 0.001 (-0.02 ; 0.02)      | 0.90             |
|                       | Adjusted | <b>-0.08 (-0.15 ; -0.01)</b> | -0.01 (-0.08 ; 0.05)         | -0.01 (-0.07 ; 0.06)          | <i>Reference</i> | 0.01 (-0.01 ; 0.03)       | 0.20             |
| AC                    | Basic    | <b>-0.20 (-0.27 ; -0.14)</b> | <b>-0.18 (-0.24 ; -0.12)</b> | <b>-0.07 (-0.13 ; -0.01)</b>  | <i>Reference</i> | <b>0.06 (0.04 ; 0.07)</b> | <b>&lt;0.001</b> |
|                       | Adjusted | <b>-0.15 (-0.22 ; -0.08)</b> | <b>-0.13 (-0.19 ; -0.06)</b> | -0.05 (-0.12 ; 0.01)          | <i>Reference</i> | <b>0.04 (0.02 ; 0.06)</b> | <b>0.02</b>      |
| EFW                   | Basic    | <b>-0.18 (-0.20 ; -0.12)</b> | <b>-0.14 (-0.20 ; -0.08)</b> | -0.05 (-0.11 ; 0.01)          | <i>Reference</i> | <b>0.05 (0.03 ; 0.06)</b> | <b>&lt;0.001</b> |
|                       | Adjusted | <b>-0.16 (-0.23 ; -0.08)</b> | <b>-0.11 (-0.17 ; -0.04)</b> | -0.05 (-0.11 ; 0.02)          | <i>Reference</i> | <b>0.04 (0.02 ; 0.06)</b> | <b>&lt;0.001</b> |

92 Abbreviations: SGA: small for gestational age, HC: head circumference, FL: femur length, AC: abdominal circumference, EFW: estimated fetal weight.

93 Values are regression coefficients with the 95% CI of the data in SD-score and are based on linear regression models. Basic model: by the use of SD scores it  
 94 is automatically adjusted for gestational age. Fully adjusted model: basic model and additionally adjusted for maternal age, educational level, smoking, alcohol  
 95 use, folic acid supplement use, ethnicity, parity, pre-pregnancy body mass index and fetal sex. p-for trend analysis with the neighbourhood deprivation as a  
 96 continuous measure.

97 **Supplemental Table 7.** Associations between the neighbourhood status score and foetal growth, additionally adjusted for household income.

| Study population       | n    | Model    | Lowest SES quartile<br>n = 2170 | Second SES quartile<br>n = 2208 | Third SES quartile<br>n = 2090 | Highest SES quartile<br>n = 2149 | Trend                        | p-value for trend |
|------------------------|------|----------|---------------------------------|---------------------------------|--------------------------------|----------------------------------|------------------------------|-------------------|
|                        |      |          | $\beta$ (95% CI)                | $\beta$ (95% CI)                | $\beta$ (95% CI)               | $\beta$ (95% CI)                 | $\beta$ (95% CI)             |                   |
| <b>Early pregnancy</b> |      |          |                                 |                                 |                                |                                  |                              |                   |
| CRL                    | 1614 | Basic    | -0.03 (-0.17 ; 0.10)            | -0.08 (-0.21 ; 0.05)            | -0.08 (-0.20 ; 0.05)           | Reference                        | 0.01 (-0.02 ; 0.05)          | 0.48              |
|                        |      | Adjusted | 0.002 (-0.15 ; 0.16)            | -0.04 (-0.17 ; 0.10)            | -0.06 (-0.19 ; 0.06)           | Reference                        | 0.02 (-0.02 ; 0.07)          | 0.30              |
| HC                     | 5646 | Basic    | 0.05 (-0.03 ; 0.13)             | 0.05 (-0.03 ; 0.13)             | 0.05 (-0.02 ; 0.13)            | Reference                        | -0.01 (-0.03 ; 0.01)         | 0.44              |
|                        |      | Adjusted | 0.02 (-0.06 ; 0.11)             | 0.04 (-0.04 ; 0.12)             | 0.05 (-0.03 ; 0.13)            | Reference                        | 0.004 (-0.02 ; 0.03)         | 0.75              |
| FL                     | 4682 | Basic    | 0.01 (-0.07 ; 0.09)             | <b>-0.09 (-0.17 ; -0.01)</b>    | 0.06 (-0.02 ; 0.14)            | Reference                        | 0.01 (-0.01 ; 0.03)          | 0.44              |
|                        |      | Adjusted | -0.09 (-0.18 ; 0.003)           | <b>-0.16 (-0.24 ; -0.07)</b>    | 0.01 (-0.06 ; 0.10)            | Reference                        | <b>0.03 (0.002 ; 0.06)</b>   | <b>0.04</b>       |
| <b>Mid pregnancy</b>   |      |          |                                 |                                 |                                |                                  |                              |                   |
| HC                     | 8035 | Basic    | <b>-0.08 (-0.15 ; -0.02)</b>    | <b>-0.07 (-0.13 ; -0.01)</b>    | -0.04 (-0.10 ; 0.03)           | Reference                        | <b>0.02 (0.01 ; 0.04)</b>    | <b>0.01</b>       |
|                        |      | Adjusted | -0.02 (-0.09 ; 0.05)            | -0.03 (-0.10 ; 0.03)            | -0.02 (-0.08 ; 0.04)           | Reference                        | 0.02 (-0.01 ; 0.04)          | 0.18              |
| FL                     | 8058 | Basic    | <b>0.07 (0.01 ; 0.14)</b>       | <b>0.06 (0.001 ; 0.13)</b>      | 0.05 (-0.01 ; 0.12)            | Reference                        | <b>-0.02 (-0.04 ; -0.01)</b> | <b>0.01</b>       |
|                        |      | Adjusted | -0.01 (-0.08 ; 0.07)            | 0.02 (-0.05 ; 0.09)             | 0.02 (-0.05 ; 0.08)            | Reference                        | 0.003 (-0.02 ; 0.02)         | 0.80              |

|                       |      |          |                              |                              |                              |           |                           |                  |
|-----------------------|------|----------|------------------------------|------------------------------|------------------------------|-----------|---------------------------|------------------|
| AC                    | 8052 | Basic    | <b>-0.15 (-0.21 ; -0.09)</b> | <b>-0.15 (-0.21 ; -0.09)</b> | <b>-0.09 (-0.15 ; -0.03)</b> | Reference | <b>0.04 (0.03 ; 0.06)</b> | <b>&lt;0.001</b> |
|                       |      | Adjusted | <b>-0.10 (-0.17 ; -0.03)</b> | <b>-0.11 (-0.18 ; -0.05)</b> | <b>-0.07 (-0.13 ; -0.01)</b> | Reference | <b>0.03 (0.01 ; 0.05)</b> | <b>0.01</b>      |
| EFW                   | 8016 | Basic    | -0.06 (-0.12 ; 0.01)         | -0.06 (-0.12 ; 0.003)        | -0.03 (-0.09 ; 0.03)         | Reference | 0.01 (-0.001 ; 0.03)      | 0.08             |
|                       |      | Adjusted | -0.06 (-0.14 ; 0.01)         | -0.06 (-0.13 ; 0.01)         | -0.03 (-0.10 ; 0.03)         | Reference | 0.02 (-0.003 ; 0.04)      | 0.09             |
| <b>Late pregnancy</b> |      |          |                              |                              |                              |           |                           |                  |
| HC                    | 8163 | Basic    | <b>-0.24 (-0.31 ; -0.18)</b> | <b>-0.25 (-0.31 ; -0.19)</b> | <b>-0.11 (-0.17 ; -0.05)</b> | Reference | <b>0.06 (0.05 ; 0.08)</b> | <b>&lt;0.001</b> |
|                       |      | Adjusted | <b>-0.14 (-0.21 ; -0.08)</b> | <b>-0.17 (-0.24 ; -0.11)</b> | <b>-0.07 (-0.14 ; -0.01)</b> | Reference | <b>0.04 (0.02 ; 0.06)</b> | <b>0.001</b>     |
| FL                    | 8234 | Basic    | -0.06 (-0.12 ; 0.003)        | -0.03 (-0.09 ; 0.03)         | -0.02 (-0.08 ; 0.05)         | Reference | 0.01 (-0.01 ; 0.03)       | 0.21             |
|                       |      | Adjusted | <b>-0.10 (-0.17 ; -0.02)</b> | -0.04 (-0.10 ; 0.03)         | -0.03 (-0.09 ; 0.04)         | Reference | 0.02 (-0.01 ; 0.04)       | 0.16             |
| AC                    | 8212 | Basic    | <b>-0.24 (-0.30 ; -0.18)</b> | <b>-0.21 (-0.27 ; -0.15)</b> | <b>-0.10 (-0.16 ; -0.04)</b> | Reference | <b>0.06 (0.05 ; 0.08)</b> | <b>&lt;0.001</b> |
|                       |      | Adjusted | <b>-0.16 (-0.23 ; -0.09)</b> | <b>-0.13 (-0.20 ; -0.07)</b> | <b>-0.07 (-0.13 ; -0.01)</b> | Reference | <b>0.03 (0.01 ; 0.05)</b> | <b>0.002</b>     |
| EFW                   | 8201 | Basic    | <b>-0.22 (-0.28 ; -0.16)</b> | <b>-0.18 (-0.24 ; -0.11)</b> | <b>-0.09 (-0.15 ; -0.02)</b> | Reference | <b>0.06 (0.04 ; 0.07)</b> | <b>&lt;0.001</b> |
|                       |      | Adjusted | <b>-0.17 (-0.25 ; -0.10)</b> | <b>-0.12 (-0.19 ; -0.06)</b> | <b>-0.07 (-0.13 ; -0.01)</b> | Reference | <b>0.03 (0.01 ; 0.06)</b> | <b>0.001</b>     |

98 Abbreviations: HC: head circumference, FL: femur length, AC: abdominal circumference, EFW: estimated fetal weight. Values are regression coefficients  
 99 with the 95% CI of the data in SD-score and are based on linear regression models. Basic model: by the use of SD scores it is automatically adjusted for  
 100 gestational age. Fully adjusted model: basic model and additionally adjusted for maternal age, educational level, smoking, alcohol use, folic acid supplement



101 use, ethnicity, parity, pre-pregnancy body mass index, fetal sex and household income. p-for trend analysis with the neighbourhood deprivation as a  
102 continuous measure.

103 **Supplemental Table 8.** Associations between the neighbourhood status score and foetal growth, adjusted for different classification of ethnicity.

| Study population       | n    | Model    | Lowest SES quartile<br>n = 2170 | Second SES quartile<br>n = 2208 | Third SES quartile<br>n = 2090 | Highest SES quartile<br>n = 2149 | Trend                        | p-value for trend |
|------------------------|------|----------|---------------------------------|---------------------------------|--------------------------------|----------------------------------|------------------------------|-------------------|
|                        |      |          | $\beta$ (95% CI)                | $\beta$ (95% CI)                | $\beta$ (95% CI)               | $\beta$ (95% CI)                 | $\beta$ (95% CI)             |                   |
| <b>Early pregnancy</b> |      |          |                                 |                                 |                                |                                  |                              |                   |
| CRL                    | 1614 | Basic    | -0.03 (-0.17 ; 0.10)            | -0.08 (-0.21 ; 0.05)            | -0.08 (-0.20 ; 0.05)           | Reference                        | 0.01 (-0.02 ; 0.05)          | 0.48              |
|                        |      | Adjusted | 0.002 (-0.15 ; 0.16)            | -0.04 (-0.17 ; 0.10)            | -0.06 (-0.19 ; 0.06)           | Reference                        | 0.01 (-0.03 ; 0.05)          | 0.73              |
| HC                     | 5646 | Basic    | 0.05 (-0.03 ; 0.13)             | 0.05 (-0.03 ; 0.13)             | 0.05 (-0.02 ; 0.13)            | Reference                        | -0.01 (-0.03 ; 0.01)         | 0.44              |
|                        |      | Adjusted | 0.02 (-0.06 ; 0.11)             | 0.04 (-0.04 ; 0.12)             | 0.05 (-0.03 ; 0.13)            | Reference                        | 0.002 (-0.02 ; 0.03)         | 0.90              |
| FL                     | 4682 | Basic    | 0.01 (-0.07 ; 0.09)             | <b>-0.09 (-0.17 ; -0.01)</b>    | 0.06 (-0.02 ; 0.14)            | Reference                        | 0.01 (-0.01 ; 0.03)          | 0.44              |
|                        |      | Adjusted | -0.09 (-0.18 ; 0.003)           | <b>-0.16 (-0.24 ; -0.07)</b>    | 0.01 (-0.06 ; 0.10)            | Reference                        | <b>0.04 (0.01 ; 0.06)</b>    | <b>0.003</b>      |
| <b>Mid pregnancy</b>   |      |          |                                 |                                 |                                |                                  |                              |                   |
| HC                     | 8035 | Basic    | <b>-0.08 (-0.15 ; -0.02)</b>    | <b>-0.07 (-0.13 ; -0.01)</b>    | -0.04 (-0.10 ; 0.03)           | Reference                        | <b>0.02 (0.01 ; 0.04)</b>    | <b>0.01</b>       |
|                        |      | Adjusted | -0.02 (-0.09 ; 0.05)            | -0.03 (-0.10 ; 0.03)            | -0.02 (-0.08 ; 0.04)           | Reference                        | 0.01 (-0.01 ; 0.02)          | 0.57              |
| FL                     | 8058 | Basic    | <b>0.07 (0.01 ; 0.14)</b>       | <b>0.06 (0.001 ; 0.13)</b>      | 0.05 (-0.01 ; 0.12)            | Reference                        | <b>-0.02 (-0.04 ; -0.01)</b> | <b>0.01</b>       |
|                        |      | Adjusted | -0.01 (-0.08 ; 0.07)            | 0.02 (-0.05 ; 0.09)             | 0.02 (-0.05 ; 0.08)            | Reference                        | -0.004 (-0.02 ; 0.02)        | 0.69              |

|                       |      |          |                              |                              |                              |           |                           |                  |
|-----------------------|------|----------|------------------------------|------------------------------|------------------------------|-----------|---------------------------|------------------|
| AC                    | 8052 | Basic    | <b>-0.15 (-0.21 ; -0.09)</b> | <b>-0.15 (-0.21 ; -0.09)</b> | <b>-0.09 (-0.15 ; -0.03)</b> | Reference | <b>0.04 (0.03 ; 0.06)</b> | <b>&lt;0.001</b> |
|                       |      | Adjusted | <b>-0.10 (-0.17 ; -0.03)</b> | <b>-0.11 (-0.18 ; -0.05)</b> | <b>-0.07 (-0.13 ; -0.01)</b> | Reference | <b>0.03 (0.01 ; 0.05)</b> | <b>0.01</b>      |
| EFW                   | 8016 | Basic    | -0.06 (-0.12 ; 0.01)         | -0.06 (-0.12 ; 0.003)        | -0.03 (-0.09 ; 0.03)         | Reference | 0.01 (-0.001 ; 0.03)      | 0.08             |
|                       |      | Adjusted | -0.06 (-0.14 ; 0.01)         | -0.06 (-0.13 ; 0.01)         | -0.03 (-0.10 ; 0.03)         | Reference | 0.02 (-0.004 ; 0.03)      | 0.13             |
| <b>Late pregnancy</b> |      |          |                              |                              |                              |           |                           |                  |
| HC                    | 8163 | Basic    | <b>-0.24 (-0.31 ; -0.18)</b> | <b>-0.25 (-0.31 ; -0.19)</b> | <b>-0.11 (-0.17 ; -0.05)</b> | Reference | <b>0.06 (0.05 ; 0.08)</b> | <b>&lt;0.001</b> |
|                       |      | Adjusted | <b>-0.14 (-0.21 ; -0.08)</b> | <b>-0.17 (-0.24 ; -0.11)</b> | <b>-0.07 (-0.14 ; -0.01)</b> | Reference | <b>0.03 (0.02 ; 0.05)</b> | <b>&lt;0.001</b> |
| FL                    | 8234 | Basic    | -0.06 (-0.12 ; 0.003)        | -0.03 (-0.09 ; 0.03)         | -0.02 (-0.08 ; 0.05)         | Reference | 0.01 (-0.01 ; 0.03)       | 0.21             |
|                       |      | Adjusted | <b>-0.10 (-0.17 ; -0.02)</b> | -0.04 (-0.10 ; 0.03)         | -0.03 (-0.09 ; 0.04)         | Reference | 0.02 (-0.002 ; 0.04)      | 0.08             |
| AC                    | 8212 | Basic    | <b>-0.24 (-0.30 ; -0.18)</b> | <b>-0.21 (-0.27 ; -0.15)</b> | <b>-0.10 (-0.16 ; -0.04)</b> | Reference | <b>0.06 (0.05 ; 0.08)</b> | <b>&lt;0.001</b> |
|                       |      | Adjusted | <b>-0.16 (-0.23 ; -0.09)</b> | <b>-0.13 (-0.20 ; -0.07)</b> | <b>-0.07 (-0.13 ; -0.01)</b> | Reference | <b>0.04 (0.02 ; 0.06)</b> | <b>&lt;0.001</b> |
| EFW                   | 8201 | Basic    | <b>-0.22 (-0.28 ; -0.16)</b> | <b>-0.18 (-0.24 ; -0.11)</b> | <b>-0.09 (-0.15 ; -0.02)</b> | Reference | <b>0.06 (0.04 ; 0.07)</b> | <b>&lt;0.001</b> |
|                       |      | Adjusted | <b>-0.17 (-0.25 ; -0.10)</b> | <b>-0.12 (-0.19 ; -0.06)</b> | <b>-0.07 (-0.13 ; -0.01)</b> | Reference | <b>0.04 (0.02 ; 0.06)</b> | <b>&lt;0.001</b> |

104 Abbreviations: HC: head circumference, FL: femur length, AC: abdominal circumference, EFW: estimated fetal weight. Values are regression coefficients  
105 with the 95% CI of the data in SD-score and are based on linear regression models. Basic model: by the use of SD scores it is automatically adjusted for  
106 gestational age. Fully adjusted model: basic model and additionally adjusted for maternal age, educational level, smoking, alcohol use, folic acid supplement  
107 use, ethnicity, parity, pre-pregnancy body mass index and fetal sex. p-for trend analysis with the neighbourhood deprivation as a continuous measure.

108 **Supplemental Table 9.** Associations between the neighbourhood status score and SGA pregnancies, adjusted for maternal hypertension.

| Study population          | Model    | Lowest deprivation quartile<br>n = 1190 | Second deprivation quartile<br>n = 1068 | Third deprivation quartile<br>n = 1273 | Highest deprivation quartile<br>n = 1653 | Trend                 | p-value for trend |           |                              |              |
|---------------------------|----------|-----------------------------------------|-----------------------------------------|----------------------------------------|------------------------------------------|-----------------------|-------------------|-----------|------------------------------|--------------|
|                           |          | OR (95% CI)                             | OR (95% CI)                             | OR (95% CI)                            | OR (95% CI)                              | OR (95% CI)           |                   |           |                              |              |
| Small for gestational age | Adjusted | <b>1.39</b><br>(1.09 ; 1.77)            | <b>0.01</b>                             | 1.15<br>(0.91 ; 1.46)                  | 0.24                                     | 1.13<br>(0.89 ; 1.43) | 0.31              | Reference | <b>0.91</b><br>(0.85 ; 0.97) | <b>0.004</b> |

109 Abbreviations:  $\beta$ : beta; OR: odds ratio. Values are odds ratios with the 95% CI of the data in SD-score and are based on logistic regression models. Adjusted  
110 model: basic model and additionally adjusted for maternal age, educational level, smoking, alcohol use, folic acid supplement use, ethnicity, parity, pre-  
111 pregnancy body mass index, fetal sex, and additionally for maternal hypertension.. P-for trend analysis with the neighbourhood deprivation as a continuous  
112 measure. Small size for gestational age (SGA) at birth was defined as a sex and gestational age adjusted birthweight below the 10th percentile (<-1.40 SD-  
113 score) in the study cohort.  
114

115 **Supplemental Table 10.** Observed and expected values of covariates.

| <b>Maternal characteristics</b>                   |                    |                    |
|---------------------------------------------------|--------------------|--------------------|
|                                                   | <b>Observed</b>    | <b>Expected</b>    |
| Age at intake (years)                             | 29.6 (5.3)         | 29.6 (5.3)         |
| Prepregnancy body mass index (kg/m <sup>2</sup> ) | 22.8 (18.4 – 32.2) | 22.6 (18.6 – 32.4) |
| Parity (nulliparous)                              | 4796 (55.7)        | 4739 (55.7)        |
| Fetal sex (boy)                                   | 4347 (50.4)        | 4346 (50.4)        |
| Educational level                                 |                    |                    |
| Lower/no education                                | 1101 (12.8)        | 916 (11.7)         |
| Middle                                            | 4060 (47.1)        | 3638 (46.4)        |
| High                                              | 3456 (40.1)        | 3282 (41.9)        |
| Ethnicity                                         |                    |                    |
| Dutch and Western                                 | 4967 (57.6)        | 4793 (58.8)        |
| Turkish and Moroccan                              | 1464 (17.0)        | 1330 (16.3)        |
| African                                           | 1178 (13.7)        | 1076 (13.2)        |
| Asian                                             | 1008 (11.7)        | 946 (11.6)         |
| Smoking                                           |                    |                    |
| Never smoked during pregnancy                     | 6256 (72.6)        | 5472 (72.8)        |
| Smoked until pregnancy was known                  | 735 (8.5)          | 644 (8.6)          |
| Continued smoking in pregnancy                    | 1626 (18.9)        | 1403 (18.7)        |
| Alcohol                                           |                    |                    |
| Never alcohol consumption in pregnancy            | 4351 (50.5)        | 3692 (49.8)        |
| Alcohol consumption until pregnancy was known     | 1149 (13.3)        | 999 (13.5)         |
| Continued alcohol consumption in pregnancy        | 3117 (36.2)        | 2728 (36.8)        |
| Folic acid supplement use                         |                    |                    |
| None                                              | 2751 (31.9)        | 1877 (29.4)        |
| Start in first 10 weeks of pregnancy              | 2661 (30.9)        | 1981 (31.1)        |
| Start preconceptional                             | 3205 (37.2)        | 2518 (39.5)        |

116 Data are represented as n (%), mean (SD) or median with the 90% range. Percentages 'expected'

117 displayed as valid percentages.

118 **Supplemental 1.** First trimester and fetal growth, measurement guidelines.

119

120 **CRL: crown-rump length (39)**

121 CRL is measured as the largest dimension of embryo, excluding the yolk sac and extremities. A  
122 midline sagittal section of the whole embryo or fetus should be obtained, ideally with the embryo or  
123 fetus oriented horizontally on the screen. An image should be magnified sufficiently to fill most of the  
124 width of the ultrasound screen, so that the measurement line between crown and rump is at about 90°  
125 to the ultrasound beam.

126 Caliper placement: measure the fetus in a neutral position (i.e. neither flexed nor hyperextended). The  
127 end points of crown and rump should be defined clearly.

128

129

130 **HC: Head circumference (40)**

131 As described for the BPD, ensuring that the circumference placement markers correspond to the  
132 technique described on the reference chart.

133 Caliper placement: If the ultrasound equipment has ellipse measurement capacity, then the HC can be  
134 measured directly by placing the ellipse around the outside of the skull bone echoes.

135

136

137 **AC: abdominal circumference (40)**

138 - Transverse section of the fetal abdomen (as circular as possible);

139 - umbilical vein at the level of the portal sinus;

140 - stomach bubble visualized;

141 - kidneys should not be visible.

142 Caliper placement: The AC is measured at the outer surface of the skin line, either directly with ellipse  
143 calipers or calculated from linear measurements made perpendicular to each other, usually the  
144 anteroposterior abdominal diameter and transverse abdominal diameter.

145

146

147 **FL: femur length (40)**

148 The FL is imaged optimally with both ends of the ossified metaphysis clearly visible. The longest  
149 axis of the ossified diaphysis is measured. The same technique as that used to establish the reference  
150 chart should be used with regard to the angle between the femur and the insonating ultrasound beams.

151 An angle of insonation between 45° and 90° is typical.

152 Caliper placement: Each caliper is placed at the ends of the ossified diaphysis without including the  
153 distal femoral epiphysis if it is visible

154

155

156 **Supplemental 2.** Multiple imputations for missing data of covariates.

157 We imputed missing data of the covariates using multiple imputations (17). The percentages of  
158 missing values for the confounders within the population for analysis were lower than 20%. For the  
159 multiple imputation, we the Markov chain Monte Carlo approach. In the imputation model, we  
160 included all confounders, plus maternal age, ethnicity, parity and prepregnancy BMI. Furthermore, we  
161 additionally added the studied determinants and outcomes in the imputation model as prediction  
162 variables only; they were not imputed themselves. Five imputed datasets were created and analyzed  
163 together.

---

164
